# Supplementary material
Source: publisher figshare collection journal article supplement (https://acs.figshare.com/ndownloader/files/4159186)
Supplement: Supplementary file 1 [file 4159186]

 
data_pca21(Compound 1) 
 
_audit_creation_method            SHELXL-97 
_chemical_name_systematic 
; 
 ? 
; 
_chemical_name_common             ? 
_chemical_melting_point           ? 
_chemical_formula_moiety          ? 
_chemical_formula_sum 
 'C26 H26 Cd N2 O13' 
_chemical_formula_weight          686.89 
 
loop_ 
 _atom_type_symbol 
 _atom_type_description 
 _atom_type_scat_dispersion_real 
 _atom_type_scat_dispersion_imag 
 _atom_type_scat_source 
 'C'  'C'   0.0033   0.0016 
 'International Tables Vol C Tables 4.2.6.8 and 6.1.1.4' 
 'H'  'H'   0.0000   0.0000 
 'International Tables Vol C Tables 4.2.6.8 and 6.1.1.4' 
 'N'  'N'   0.0061   0.0033 
 'International Tables Vol C Tables 4.2.6.8 and 6.1.1.4' 
 'O'  'O'   0.0106   0.0060 
 'International Tables Vol C Tables 4.2.6.8 and 6.1.1.4' 
 'Cd'  'Cd'  -0.8075   1.2024 
 'International Tables Vol C Tables 4.2.6.8 and 6.1.1.4' 
 
_symmetry_cell_setting            ? 
_symmetry_space_group_name_H-M    ? 
 
loop_ 
 _symmetry_equiv_pos_as_xyz 
 'x, y, z' 
 '-x, -y, z+1/2' 
 'x+1/2, -y, z' 
 '-x+1/2, y, z+1/2' 
 
_cell_length_a                    8.0615(16) 
_cell_length_b                    25.852(5) 
_cell_length_c                    13.293(3) 
_cell_angle_alpha                 90.00 
_cell_angle_beta                  90.00 
_cell_angle_gamma                 90.00 
_cell_volume                      2770.2(9) 
_cell_formula_units_Z             4 
_cell_measurement_temperature     296(2) 
_cell_measurement_reflns_used     ? 
_cell_measurement_theta_min       ? 
_cell_measurement_theta_max       ? 
 
_exptl_crystal_description        ? 
_exptl_crystal_colour             ? 
_exptl_crystal_size_max           0.21 
_exptl_crystal_size_mid           0.16 
_exptl_crystal_size_min           0.11 
_exptl_crystal_density_meas       ? 
_exptl_crystal_density_diffrn     1.647 
_exptl_crystal_density_method     'not measured' 
_exptl_crystal_F_000              1392 
_exptl_absorpt_coefficient_mu     0.860 
_exptl_absorpt_correction_type    ? 
_exptl_absorpt_correction_T_min   0.8400 
_exptl_absorpt_correction_T_max   0.9113 
_exptl_absorpt_process_details    ? 
 
_exptl_special_details 
; 
 ? 
; 
 
_diffrn_ambient_temperature       296(2) 
_diffrn_radiation_wavelength      0.71073 
_diffrn_radiation_type            MoK\a 
_diffrn_radiation_source          'fine-focus sealed tube' 
_diffrn_radiation_monochromator   graphite 
_diffrn_measurement_device_type   ? 
_diffrn_measurement_method        ? 
_diffrn_detector_area_resol_mean  ? 
_diffrn_reflns_number             14275 
_diffrn_reflns_av_R_equivalents   0.0357 
_diffrn_reflns_av_sigmaI/netI     0.0436 
_diffrn_reflns_limit_h_min        -8 
_diffrn_reflns_limit_h_max        9 
_diffrn_reflns_limit_k_min        -29 
_diffrn_reflns_limit_k_max        31 
_diffrn_reflns_limit_l_min        -16 
_diffrn_reflns_limit_l_max        16 
_diffrn_reflns_theta_min          2.36 
_diffrn_reflns_theta_max          25.50 
_reflns_number_total              5142 
_reflns_number_gt                 4476 
_reflns_threshold_expression      >2sigma(I) 
 
_computing_data_collection        ? 
_computing_cell_refinement        ? 
_computing_data_reduction         ? 
_computing_structure_solution     'SHELXS-97 (Sheldrick, 2008)' 
_computing_structure_refinement   'SHELXL-97 (Sheldrick, 2008)' 
_computing_molecular_graphics     ? 
_computing_publication_material   ? 
 
_refine_special_details 
; 
 Refinement of F^2^ against ALL reflections.  The weighted R-factor wR and 
 goodness of fit S are based on F^2^, conventional R-factors R are based 
 on F, with F set to zero for negative F^2^. The threshold expression of 
 F^2^ > 2sigma(F^2^) is used only for calculating R-factors(gt) etc. and is 
 not relevant to the choice of reflections for refinement.  R-factors based 
 on F^2^ are statistically about twice as large as those based on F, and R- 
 factors based on ALL data will be even larger. 
; 
 
_refine_ls_structure_factor_coef  Fsqd  
_refine_ls_matrix_type            full 
_refine_ls_weighting_scheme       calc  
_refine_ls_weighting_details 
 'calc w=1/[\s^2^(Fo^2^)+(0.0382P)^2^+0.3693P] where P=(Fo^2^+2Fc^2^)/3' 
_atom_sites_solution_primary      direct 
_atom_sites_solution_secondary    difmap 
_atom_sites_solution_hydrogens    geom 
_refine_ls_hydrogen_treatment     mixed 
_refine_ls_extinction_method      none 
_refine_ls_extinction_coef        ? 
_refine_ls_abs_structure_details 
 'Flack H D (1983), Acta Cryst. A39, 876-881' 
_refine_ls_abs_structure_Flack    0.07(3) 
_refine_ls_number_reflns          5142 
_refine_ls_number_parameters      403 
_refine_ls_number_restraints      11 
_refine_ls_R_factor_all           0.0408 
_refine_ls_R_factor_gt            0.0334 
_refine_ls_wR_factor_ref          0.0756 
_refine_ls_wR_factor_gt           0.0723 
_refine_ls_goodness_of_fit_ref    1.009 
_refine_ls_restrained_S_all       1.008 
_refine_ls_shift/su_max           0.000 
_refine_ls_shift/su_mean          0.000 
 
loop_ 
 _atom_site_label 
 _atom_site_type_symbol 
 _atom_site_fract_x 
 _atom_site_fract_y 
 _atom_site_fract_z 
 _atom_site_U_iso_or_equiv 
 _atom_site_adp_type 
 _atom_site_occupancy 
 _atom_site_symmetry_multiplicity 
 _atom_site_calc_flag 
 _atom_site_refinement_flags 
 _atom_site_disorder_assembly 
 _atom_site_disorder_group 
C16 C 0.4225(6) 0.30711(19) 0.4329(3) 0.0356(11) Uani 1 1 d . . . 
O5 O 0.5407(4) 0.33106(14) 0.3939(2) 0.0450(9) Uani 1 1 d . . . 
O4 O 0.3693(4) 0.26520(13) 0.3986(2) 0.0475(9) Uani 1 1 d . . . 
Cd1 Cd -0.01226(3) 0.257657(9) 0.74883(4) 0.02446(8) Uani 1 1 d . . . 
C1 C -0.0449(5) 0.18342(16) 0.5458(3) 0.0262(9) Uani 1 1 d . . . 
C3 C -0.1140(5) 0.12128(16) 0.4065(3) 0.0266(9) Uani 1 1 d . . . 
H3 H -0.0413 0.0974 0.4345 0.032 Uiso 1 1 calc R . . 
C5 C -0.3075(5) 0.14615(15) 0.2817(3) 0.0276(10) Uani 1 1 d . . . 
H5 H -0.3683 0.1384 0.2243 0.033 Uiso 1 1 calc R . . 
C4 C -0.2021(5) 0.10886(15) 0.3189(3) 0.0283(10) Uani 1 1 d . . . 
C2 C -0.1351(5) 0.16900(15) 0.4512(3) 0.0259(9) Uani 1 1 d . . . 
C6 C -0.2424(5) 0.20381(15) 0.4072(3) 0.0268(9) Uani 1 1 d . . . 
H6 H -0.2562 0.2361 0.4367 0.032 Uiso 1 1 calc R . . 
O9 O 0.5313(4) 0.37189(14) 0.8067(3) 0.0529(10) Uani 1 1 d . . . 
C26 C 0.4805(6) 0.41080(19) 0.8458(4) 0.0384(12) Uani 1 1 d . . . 
C20 C 0.3346(5) 0.44755(17) 0.6941(4) 0.0295(11) Uani 1 1 d . . . 
C25 C 0.4037(6) 0.45432(18) 0.7886(4) 0.0313(11) Uani 1 1 d . . . 
C19 C 0.1937(5) 0.36190(15) 0.6967(3) 0.0276(9) Uani 1 1 d . . . 
H19 H 0.1441 0.3729 0.7562 0.033 Uiso 1 1 calc R . . 
C18 C 0.3045(5) 0.39433(15) 0.6509(3) 0.0258(9) Uani 1 1 d . . . 
O6 O 0.2106(4) 0.19641(12) 0.7335(3) 0.0419(8) Uani 1 1 d D . . 
N1 N 0.1525(4) 0.31500(13) 0.6609(3) 0.0275(8) Uani 1 1 d . . . 
O2 O -0.0960(4) 0.22070(11) 0.5946(2) 0.0322(7) Uani 1 1 d . . . 
O10 O 0.4910(5) 0.41905(17) 0.9432(3) 0.0628(12) Uani 1 1 d . . . 
H10 H 0.5389 0.3947 0.9700 0.094 Uiso 1 1 calc R . . 
O1 O 0.0797(4) 0.15520(12) 0.5685(2) 0.0346(8) Uani 1 1 d . . . 
O3 O -0.2516(4) 0.30417(14) 0.7087(3) 0.0411(8) Uani 1 1 d D . . 
N2 N -0.3275(4) 0.19269(13) 0.3232(3) 0.0276(8) Uani 1 1 d . . . 
C8 C -0.1229(5) 0.04747(17) 0.1763(4) 0.0323(10) Uani 1 1 d . . . 
O7 O -0.0316(7) 0.13226(17) 0.1449(4) 0.111(2) Uani 1 1 d . . . 
C21 C 0.2839(6) 0.48852(17) 0.6390(4) 0.0437(13) Uani 1 1 d . . . 
H21 H 0.2378 0.4836 0.5755 0.052 Uiso 1 1 calc R . . 
C10 C -0.1141(6) -0.00340(18) 0.1397(4) 0.0415(12) Uani 1 1 d . . . 
H10A H -0.0746 -0.0095 0.0750 0.050 Uiso 1 1 calc R . . 
C9 C -0.0553(7) 0.0905(2) 0.1139(4) 0.0440(12) Uani 1 1 d . . . 
C7 C -0.1860(5) 0.05640(15) 0.2730(3) 0.0267(11) Uani 1 1 d . . . 
C23 C 0.3659(6) 0.5462(2) 0.7730(5) 0.0544(17) Uani 1 1 d . . . 
H23 H 0.3750 0.5794 0.7994 0.065 Uiso 1 1 calc R . . 
C15 C 0.3399(5) 0.32938(16) 0.5250(3) 0.0247(9) Uani 1 1 d . . . 
C24 C 0.4166(6) 0.50427(18) 0.8280(4) 0.0429(12) Uani 1 1 d . . . 
H24 H 0.4600 0.5091 0.8922 0.051 Uiso 1 1 calc R . . 
C14 C 0.2251(5) 0.30003(15) 0.5764(3) 0.0289(10) Uani 1 1 d . . . 
H14 H 0.1969 0.2678 0.5503 0.035 Uiso 1 1 calc R . . 
C17 C 0.3774(5) 0.37774(16) 0.5623(3) 0.0298(10) Uani 1 1 d . . . 
H17 H 0.4512 0.3991 0.5282 0.036 Uiso 1 1 calc R . . 
C22 C 0.3018(7) 0.5388(2) 0.6787(5) 0.0573(16) Uani 1 1 d . . . 
H22 H 0.2697 0.5673 0.6404 0.069 Uiso 1 1 calc R . . 
O8 O -0.0163(5) 0.07738(17) 0.0227(3) 0.0624(11) Uani 1 1 d . . . 
H8 H 0.0468 0.0990 -0.0011 0.094 Uiso 1 1 calc R . . 
C12 C -0.2236(7) -0.0360(2) 0.2941(5) 0.0529(16) Uani 1 1 d . . . 
H12 H -0.2569 -0.0638 0.3336 0.063 Uiso 1 1 calc R . . 
C11 C -0.1630(7) -0.0438(2) 0.1983(5) 0.0514(16) Uani 1 1 d . . . 
H11 H -0.1554 -0.0773 0.1732 0.062 Uiso 1 1 calc R . . 
C13 C -0.2336(7) 0.01419(17) 0.3302(4) 0.0434(12) Uani 1 1 d . . . 
H13 H -0.2737 0.0197 0.3950 0.052 Uiso 1 1 calc R . . 
O11 O 0.8122(5) 0.3506(2) 0.5171(4) 0.0751(14) Uani 1 1 d D . . 
H1W H 0.8137 0.3290 0.4951 0.19(6) Uiso 1 1 d R . . 
H2W H 0.7779 0.3400 0.5711 0.040(15) Uiso 1 1 d RD . . 
O12 O 0.1631(4) 0.15318(13) 0.9355(3) 0.0533(10) Uani 1 1 d . . . 
H3W H 0.2429 0.1537 0.9773 0.064 Uiso 1 1 d R . . 
H4W H 0.1652 0.1609 0.8841 0.064 Uiso 1 1 d RD . . 
O13 O 0.5222(6) 0.2376(2) 0.6492(7) 0.100(2) Uani 1 1 d D . . 
H5W H 0.5255 0.2047 0.6473 0.120 Uiso 1 1 d R . . 
H29 H 0.280(3) 0.186(2) 0.774(2) 0.16(4) Uiso 1 1 d D . . 
H28 H 0.172(5) 0.1786(15) 0.688(2) 0.034(14) Uiso 1 1 d D . . 
H26 H -0.292(6) 0.3235(17) 0.756(3) 0.08(2) Uiso 1 1 d D . . 
H6W H 0.482(10) 0.246(3) 0.708(3) 0.13(5) Uiso 1 1 d D . . 
H27 H -0.325(5) 0.2845(17) 0.681(4) 0.08(2) Uiso 1 1 d D . . 
 
loop_ 
 _atom_site_aniso_label 
 _atom_site_aniso_U_11 
 _atom_site_aniso_U_22 
 _atom_site_aniso_U_33 
 _atom_site_aniso_U_23 
 _atom_site_aniso_U_13 
 _atom_site_aniso_U_12 
C16 0.038(3) 0.044(3) 0.026(3) 0.006(2) 0.002(2) 0.010(2) 
O5 0.048(2) 0.059(2) 0.0278(18) 0.0044(16) 0.0116(16) -0.0001(17) 
O4 0.061(2) 0.047(2) 0.0350(19) -0.0189(16) 0.0089(17) -0.0017(18) 
Cd1 0.02900(14) 0.02439(14) 0.01999(13) -0.0017(3) -0.0002(2) -0.00410(10) 
C1 0.030(2) 0.026(2) 0.023(2) 0.0010(18) -0.0032(18) -0.0051(18) 
C3 0.035(3) 0.023(2) 0.022(2) 0.0007(18) -0.0031(19) 0.0028(19) 
C5 0.028(2) 0.031(2) 0.023(2) -0.0035(16) -0.0060(16) 0.0020(17) 
C4 0.035(2) 0.026(2) 0.024(2) -0.0019(17) -0.0011(19) 0.0021(18) 
C2 0.031(2) 0.027(2) 0.020(2) -0.0029(17) -0.0009(18) 0.0001(18) 
C6 0.035(2) 0.022(2) 0.023(2) -0.0067(18) -0.0019(19) -0.0002(19) 
O9 0.067(2) 0.040(2) 0.052(2) -0.0136(18) -0.010(2) 0.0213(18) 
C26 0.035(3) 0.042(3) 0.038(3) -0.007(2) -0.004(2) -0.001(2) 
C20 0.023(2) 0.028(3) 0.037(3) -0.003(2) 0.009(2) -0.003(2) 
C25 0.025(3) 0.035(3) 0.034(2) -0.0089(19) 0.004(2) 0.004(2) 
C19 0.037(2) 0.027(2) 0.018(2) -0.0053(17) 0.0053(19) -0.0015(18) 
C18 0.022(2) 0.030(2) 0.025(2) -0.0004(18) -0.0002(18) -0.0024(17) 
O6 0.0410(17) 0.0464(19) 0.038(2) -0.0116(19) -0.0081(18) 0.0096(14) 
N1 0.032(2) 0.028(2) 0.023(2) -0.0042(15) 0.0043(16) -0.0023(15) 
O2 0.0388(18) 0.0322(17) 0.0256(16) -0.0109(13) -0.0063(14) 0.0039(14) 
O10 0.077(3) 0.070(3) 0.041(2) -0.0097(19) -0.006(2) 0.021(2) 
O1 0.0361(19) 0.0414(19) 0.0263(18) -0.0033(14) -0.0099(15) 0.0090(16) 
O3 0.0372(19) 0.041(2) 0.045(2) -0.0093(16) -0.0025(15) 0.0101(17) 
N2 0.0299(19) 0.026(2) 0.027(2) -0.0019(16) 0.0007(16) 0.0064(15) 
C8 0.034(3) 0.028(3) 0.035(3) -0.005(2) -0.003(2) 0.005(2) 
O7 0.202(6) 0.040(3) 0.090(4) -0.020(2) 0.093(4) -0.033(3) 
C21 0.048(3) 0.037(3) 0.046(3) 0.004(2) -0.002(2) -0.004(2) 
C10 0.045(3) 0.040(3) 0.039(3) -0.019(2) -0.002(2) 0.008(2) 
C9 0.054(3) 0.040(3) 0.039(3) -0.007(2) 0.009(2) 0.009(3) 
C7 0.029(2) 0.023(2) 0.028(3) -0.0046(16) -0.0075(18) 0.0052(16) 
C23 0.051(3) 0.031(3) 0.081(5) -0.010(3) 0.013(3) -0.002(2) 
C15 0.025(2) 0.032(2) 0.017(2) -0.0037(17) 0.0023(18) 0.0056(18) 
C24 0.042(3) 0.036(3) 0.051(3) -0.016(2) 0.000(3) -0.001(2) 
C14 0.038(3) 0.025(2) 0.024(2) -0.0061(18) -0.001(2) -0.0001(19) 
C17 0.031(2) 0.029(2) 0.029(3) 0.0065(18) 0.0066(19) -0.0051(18) 
C22 0.057(4) 0.029(3) 0.086(5) 0.009(3) 0.010(4) 0.001(3) 
O8 0.089(3) 0.066(3) 0.032(2) -0.0098(18) 0.008(2) -0.022(2) 
C12 0.060(4) 0.029(3) 0.069(4) 0.005(3) -0.002(3) -0.003(3) 
C11 0.059(4) 0.025(3) 0.070(4) -0.010(3) -0.003(3) 0.005(3) 
C13 0.054(3) 0.034(3) 0.042(3) -0.003(2) 0.003(3) 0.000(3) 
O11 0.077(3) 0.098(3) 0.050(3) 0.025(3) -0.003(2) -0.029(2) 
O12 0.052(2) 0.075(3) 0.034(2) 0.0056(18) -0.0075(18) -0.008(2) 
O13 0.061(3) 0.057(3) 0.183(8) 0.005(4) -0.023(4) -0.004(2) 
 
_geom_special_details 
; 
 All esds (except the esd in the dihedral angle between two l.s. planes) 
 are estimated using the full covariance matrix.  The cell esds are taken 
 into account individually in the estimation of esds in distances, angles 
 and torsion angles; correlations between esds in cell parameters are only 
 used when they are defined by crystal symmetry.  An approximate (isotropic) 
 treatment of cell esds is used for estimating esds involving l.s. planes. 
; 
 
loop_ 
 _geom_bond_atom_site_label_1 
 _geom_bond_atom_site_label_2 
 _geom_bond_distance 
 _geom_bond_site_symmetry_2 
 _geom_bond_publ_flag 
C16 O5 1.249(6) . ? 
C16 O4 1.251(5) . ? 
C16 C15 1.508(6) . ? 
O4 Cd1 2.309(3) 4_554 ? 
Cd1 N1 2.308(3) . ? 
Cd1 O4 2.309(3) 4 ? 
Cd1 O3 2.336(3) . ? 
Cd1 N2 2.338(3) 4_455 ? 
Cd1 O2 2.360(3) . ? 
Cd1 O6 2.403(3) . ? 
C1 O2 1.232(5) . ? 
C1 O1 1.278(5) . ? 
C1 C2 1.500(6) . ? 
C3 C2 1.380(6) . ? 
C3 C4 1.400(6) . ? 
C3 H3 0.9300 . ? 
C5 N2 1.333(5) . ? 
C5 C4 1.377(5) . ? 
C5 H5 0.9300 . ? 
C4 C7 1.493(5) . ? 
C2 C6 1.378(5) . ? 
C6 N2 1.341(5) . ? 
C6 H6 0.9300 . ? 
O9 C26 1.204(6) . ? 
C26 O10 1.316(6) . ? 
C26 C25 1.492(7) . ? 
C20 C21 1.352(7) . ? 
C20 C25 1.385(6) . ? 
C20 C18 1.511(6) . ? 
C25 C24 1.398(6) . ? 
C19 N1 1.345(5) . ? 
C19 C18 1.368(5) . ? 
C19 H19 0.9300 . ? 
C18 C17 1.384(6) . ? 
O6 H29 0.825(19) . ? 
O6 H28 0.823(18) . ? 
N1 C14 1.324(5) . ? 
O10 H10 0.8200 . ? 
O3 H26 0.863(19) . ? 
O3 H27 0.862(14) . ? 
N2 Cd1 2.338(3) 4_454 ? 
C8 C7 1.402(6) . ? 
C8 C10 1.404(6) . ? 
C8 C9 1.490(7) . ? 
O7 C9 1.171(6) . ? 
C21 C22 1.411(7) . ? 
C21 H21 0.9300 . ? 
C10 C11 1.361(7) . ? 
C10 H10A 0.9300 . ? 
C9 O8 1.298(6) . ? 
C7 C13 1.385(6) . ? 
C23 C22 1.369(8) . ? 
C23 C24 1.370(7) . ? 
C23 H23 0.9300 . ? 
C15 C14 1.378(6) . ? 
C15 C17 1.379(6) . ? 
C24 H24 0.9300 . ? 
C14 H14 0.9300 . ? 
C17 H17 0.9300 . ? 
C22 H22 0.9300 . ? 
O8 H8 0.8200 . ? 
C12 C11 1.379(7) . ? 
C12 C13 1.386(7) . ? 
C12 H12 0.9300 . ? 
C11 H11 0.9300 . ? 
C13 H13 0.9300 . ? 
O11 H1W 0.6310 . ? 
O11 H2W 0.8175 . ? 
O12 H3W 0.8501 . ? 
O12 H4W 0.7116 . ? 
O13 H5W 0.8505 . ? 
O13 H6W 0.87(2) . ? 
 
loop_ 
 _geom_angle_atom_site_label_1 
 _geom_angle_atom_site_label_2 
 _geom_angle_atom_site_label_3 
 _geom_angle 
 _geom_angle_site_symmetry_1 
 _geom_angle_site_symmetry_3 
 _geom_angle_publ_flag 
O5 C16 O4 122.7(4) . . ? 
O5 C16 C15 119.0(4) . . ? 
O4 C16 C15 118.4(4) . . ? 
C16 O4 Cd1 102.5(3) . 4_554 ? 
N1 Cd1 O4 95.46(12) . 4 ? 
N1 Cd1 O3 91.66(12) . . ? 
O4 Cd1 O3 124.49(12) 4 . ? 
N1 Cd1 N2 173.39(12) . 4_455 ? 
O4 Cd1 N2 88.39(12) 4 4_455 ? 
O3 Cd1 N2 90.57(12) . 4_455 ? 
N1 Cd1 O2 89.13(11) . . ? 
O4 Cd1 O2 157.81(11) 4 . ? 
O3 Cd1 O2 76.90(12) . . ? 
N2 Cd1 O2 85.32(11) 4_455 . ? 
N1 Cd1 O6 87.14(12) . . ? 
O4 Cd1 O6 75.84(12) 4 . ? 
O3 Cd1 O6 159.63(13) . . ? 
N2 Cd1 O6 88.61(12) 4_455 . ? 
O2 Cd1 O6 82.75(12) . . ? 
O2 C1 O1 125.8(4) . . ? 
O2 C1 C2 118.3(4) . . ? 
O1 C1 C2 115.9(4) . . ? 
C2 C3 C4 120.0(4) . . ? 
C2 C3 H3 120.0 . . ? 
C4 C3 H3 120.0 . . ? 
N2 C5 C4 123.9(4) . . ? 
N2 C5 H5 118.0 . . ? 
C4 C5 H5 118.0 . . ? 
C5 C4 C3 116.8(4) . . ? 
C5 C4 C7 122.9(4) . . ? 
C3 C4 C7 120.3(4) . . ? 
C6 C2 C3 118.5(4) . . ? 
C6 C2 C1 119.9(4) . . ? 
C3 C2 C1 121.6(4) . . ? 
N2 C6 C2 122.3(4) . . ? 
N2 C6 H6 118.8 . . ? 
C2 C6 H6 118.8 . . ? 
O9 C26 O10 122.6(5) . . ? 
O9 C26 C25 123.5(5) . . ? 
O10 C26 C25 114.0(4) . . ? 
C21 C20 C25 121.0(5) . . ? 
C21 C20 C18 117.3(4) . . ? 
C25 C20 C18 121.7(5) . . ? 
C20 C25 C24 119.1(5) . . ? 
C20 C25 C26 122.2(5) . . ? 
C24 C25 C26 118.3(4) . . ? 
N1 C19 C18 123.8(4) . . ? 
N1 C19 H19 118.1 . . ? 
C18 C19 H19 118.1 . . ? 
C19 C18 C17 117.8(4) . . ? 
C19 C18 C20 119.6(4) . . ? 
C17 C18 C20 122.5(4) . . ? 
Cd1 O6 H29 132(4) . . ? 
Cd1 O6 H28 99(3) . . ? 
H29 O6 H28 123(4) . . ? 
C14 N1 C19 117.1(4) . . ? 
C14 N1 Cd1 119.8(3) . . ? 
C19 N1 Cd1 122.8(3) . . ? 
C1 O2 Cd1 132.7(3) . . ? 
C26 O10 H10 109.5 . . ? 
Cd1 O3 H26 116(4) . . ? 
Cd1 O3 H27 111(4) . . ? 
H26 O3 H27 113(3) . . ? 
C5 N2 C6 118.4(3) . . ? 
C5 N2 Cd1 122.7(3) . 4_454 ? 
C6 N2 Cd1 118.7(3) . 4_454 ? 
C7 C8 C10 119.4(4) . . ? 
C7 C8 C9 121.3(4) . . ? 
C10 C8 C9 119.2(4) . . ? 
C20 C21 C22 119.3(5) . . ? 
C20 C21 H21 120.4 . . ? 
C22 C21 H21 120.4 . . ? 
C11 C10 C8 120.4(5) . . ? 
C11 C10 H10A 119.8 . . ? 
C8 C10 H10A 119.8 . . ? 
O7 C9 O8 122.0(5) . . ? 
O7 C9 C8 123.5(5) . . ? 
O8 C9 C8 114.4(4) . . ? 
C13 C7 C8 118.4(4) . . ? 
C13 C7 C4 117.8(4) . . ? 
C8 C7 C4 123.8(4) . . ? 
C22 C23 C24 119.5(5) . . ? 
C22 C23 H23 120.3 . . ? 
C24 C23 H23 120.3 . . ? 
C14 C15 C17 117.9(4) . . ? 
C14 C15 C16 119.3(4) . . ? 
C17 C15 C16 122.8(4) . . ? 
C23 C24 C25 120.5(5) . . ? 
C23 C24 H24 119.7 . . ? 
C25 C24 H24 119.7 . . ? 
N1 C14 C15 123.8(4) . . ? 
N1 C14 H14 118.1 . . ? 
C15 C14 H14 118.1 . . ? 
C15 C17 C18 119.6(4) . . ? 
C15 C17 H17 120.2 . . ? 
C18 C17 H17 120.2 . . ? 
C23 C22 C21 120.6(6) . . ? 
C23 C22 H22 119.7 . . ? 
C21 C22 H22 119.7 . . ? 
C9 O8 H8 109.5 . . ? 
C11 C12 C13 118.5(6) . . ? 
C11 C12 H12 120.7 . . ? 
C13 C12 H12 120.7 . . ? 
C10 C11 C12 121.3(6) . . ? 
C10 C11 H11 119.4 . . ? 
C12 C11 H11 119.4 . . ? 
C7 C13 C12 122.1(5) . . ? 
C7 C13 H13 119.0 . . ? 
C12 C13 H13 119.0 . . ? 
H1W O11 H2W 96.7 . . ? 
H3W O12 H4W 127.2 . . ? 
H5W O13 H6W 106.5 . . ? 
 
loop_ 
 _geom_torsion_atom_site_label_1 
 _geom_torsion_atom_site_label_2 
 _geom_torsion_atom_site_label_3 
 _geom_torsion_atom_site_label_4 
 _geom_torsion 
 _geom_torsion_site_symmetry_1 
 _geom_torsion_site_symmetry_2 
 _geom_torsion_site_symmetry_3 
 _geom_torsion_site_symmetry_4 
 _geom_torsion_publ_flag 
O5 C16 O4 Cd1 -8.3(5) . . . 4_554 ? 
C15 C16 O4 Cd1 171.7(3) . . . 4_554 ? 
N2 C5 C4 C3 1.0(6) . . . . ? 
N2 C5 C4 C7 178.0(4) . . . . ? 
C2 C3 C4 C5 0.0(6) . . . . ? 
C2 C3 C4 C7 -177.0(4) . . . . ? 
C4 C3 C2 C6 -0.8(6) . . . . ? 
C4 C3 C2 C1 179.1(4) . . . . ? 
O2 C1 C2 C6 16.5(6) . . . . ? 
O1 C1 C2 C6 -163.7(4) . . . . ? 
O2 C1 C2 C3 -163.4(4) . . . . ? 
O1 C1 C2 C3 16.5(6) . . . . ? 
C3 C2 C6 N2 0.6(6) . . . . ? 
C1 C2 C6 N2 -179.3(4) . . . . ? 
C21 C20 C25 C24 1.8(6) . . . . ? 
C18 C20 C25 C24 -175.0(4) . . . . ? 
C21 C20 C25 C26 -172.0(5) . . . . ? 
C18 C20 C25 C26 11.3(6) . . . . ? 
O9 C26 C25 C20 22.0(7) . . . . ? 
O10 C26 C25 C20 -159.2(4) . . . . ? 
O9 C26 C25 C24 -151.8(5) . . . . ? 
O10 C26 C25 C24 27.0(6) . . . . ? 
N1 C19 C18 C17 0.2(6) . . . . ? 
N1 C19 C18 C20 176.4(4) . . . . ? 
C21 C20 C18 C19 -112.7(5) . . . . ? 
C25 C20 C18 C19 64.1(5) . . . . ? 
C21 C20 C18 C17 63.3(6) . . . . ? 
C25 C20 C18 C17 -119.9(5) . . . . ? 
C18 C19 N1 C14 0.2(6) . . . . ? 
C18 C19 N1 Cd1 173.1(3) . . . . ? 
O4 Cd1 N1 C14 124.4(3) 4 . . . ? 
O3 Cd1 N1 C14 -110.7(3) . . . . ? 
N2 Cd1 N1 C14 -1.0(13) 4_455 . . . ? 
O2 Cd1 N1 C14 -33.9(3) . . . . ? 
O6 Cd1 N1 C14 48.9(3) . . . . ? 
O4 Cd1 N1 C19 -48.3(3) 4 . . . ? 
O3 Cd1 N1 C19 76.6(3) . . . . ? 
N2 Cd1 N1 C19 -173.7(10) 4_455 . . . ? 
O2 Cd1 N1 C19 153.5(3) . . . . ? 
O6 Cd1 N1 C19 -123.8(3) . . . . ? 
O1 C1 O2 Cd1 -2.9(7) . . . . ? 
C2 C1 O2 Cd1 177.0(3) . . . . ? 
N1 Cd1 O2 C1 94.2(4) . . . . ? 
O4 Cd1 O2 C1 -8.2(6) 4 . . . ? 
O3 Cd1 O2 C1 -173.9(4) . . . . ? 
N2 Cd1 O2 C1 -82.2(4) 4_455 . . . ? 
O6 Cd1 O2 C1 7.0(4) . . . . ? 
C4 C5 N2 C6 -1.2(6) . . . . ? 
C4 C5 N2 Cd1 173.8(3) . . . 4_454 ? 
C2 C6 N2 C5 0.4(6) . . . . ? 
C2 C6 N2 Cd1 -174.9(3) . . . 4_454 ? 
C25 C20 C21 C22 -0.1(7) . . . . ? 
C18 C20 C21 C22 176.8(4) . . . . ? 
C7 C8 C10 C11 -1.4(7) . . . . ? 
C9 C8 C10 C11 174.9(5) . . . . ? 
C7 C8 C9 O7 9.7(9) . . . . ? 
C10 C8 C9 O7 -166.5(6) . . . . ? 
C7 C8 C9 O8 -173.6(4) . . . . ? 
C10 C8 C9 O8 10.2(7) . . . . ? 
C10 C8 C7 C13 1.7(6) . . . . ? 
C9 C8 C7 C13 -174.5(5) . . . . ? 
C10 C8 C7 C4 -179.5(4) . . . . ? 
C9 C8 C7 C4 4.3(6) . . . . ? 
C5 C4 C7 C13 -115.9(5) . . . . ? 
C3 C4 C7 C13 61.0(6) . . . . ? 
C5 C4 C7 C8 65.2(6) . . . . ? 
C3 C4 C7 C8 -117.9(5) . . . . ? 
O5 C16 C15 C14 -171.2(4) . . . . ? 
O4 C16 C15 C14 8.8(6) . . . . ? 
O5 C16 C15 C17 7.0(6) . . . . ? 
O4 C16 C15 C17 -173.0(4) . . . . ? 
C22 C23 C24 C25 0.2(8) . . . . ? 
C20 C25 C24 C23 -1.8(7) . . . . ? 
C26 C25 C24 C23 172.2(4) . . . . ? 
C19 N1 C14 C15 0.7(6) . . . . ? 
Cd1 N1 C14 C15 -172.4(3) . . . . ? 
C17 C15 C14 N1 -2.0(6) . . . . ? 
C16 C15 C14 N1 176.3(4) . . . . ? 
C14 C15 C17 C18 2.4(6) . . . . ? 
C16 C15 C17 C18 -175.8(4) . . . . ? 
C19 C18 C17 C15 -1.6(6) . . . . ? 
C20 C18 C17 C15 -177.6(4) . . . . ? 
C24 C23 C22 C21 1.5(8) . . . . ? 
C20 C21 C22 C23 -1.6(8) . . . . ? 
C8 C10 C11 C12 0.6(8) . . . . ? 
C13 C12 C11 C10 -0.1(9) . . . . ? 
C8 C7 C13 C12 -1.2(7) . . . . ? 
C4 C7 C13 C12 179.9(5) . . . . ? 
C11 C12 C13 C7 0.4(8) . . . . ? 
 
loop_ 
 _geom_hbond_atom_site_label_D 
 _geom_hbond_atom_site_label_H 
 _geom_hbond_atom_site_label_A 
 _geom_hbond_distance_DH 
 _geom_hbond_distance_HA 
 _geom_hbond_distance_DA 
 _geom_hbond_angle_DHA 
 _geom_hbond_site_symmetry_A 
O8 H8 O12  0.82 1.88 2.697(5) 171.4 1_554 
O10 H10 O11  0.82 1.77 2.571(6) 165.3 4_655 
 
_diffrn_measured_fraction_theta_max    0.999 
_diffrn_reflns_theta_full              25.50 
_diffrn_measured_fraction_theta_full   0.999 
_refine_diff_density_max    0.423 
_refine_diff_density_min   -0.900 
_refine_diff_density_rms    0.063

#===END

 
data_p21c (Compound 2) 
 
_audit_creation_method            SHELXL-97 
_chemical_name_systematic 
; 
 ? 
; 
_chemical_name_common             ? 
_chemical_melting_point           ? 
_chemical_formula_moiety          ? 
_chemical_formula_sum 
 'C13 H9 Cd N O5' 
_chemical_formula_weight          371.61 
 
loop_ 
 _atom_type_symbol 
 _atom_type_description 
 _atom_type_scat_dispersion_real 
 _atom_type_scat_dispersion_imag 
 _atom_type_scat_source 
 'C'  'C'   0.0033   0.0016 
 'International Tables Vol C Tables 4.2.6.8 and 6.1.1.4' 
 'H'  'H'   0.0000   0.0000 
 'International Tables Vol C Tables 4.2.6.8 and 6.1.1.4' 
 'N'  'N'   0.0061   0.0033 
 'International Tables Vol C Tables 4.2.6.8 and 6.1.1.4' 
 'O'  'O'   0.0106   0.0060 
 'International Tables Vol C Tables 4.2.6.8 and 6.1.1.4' 
 'Cd'  'Cd'  -0.8075   1.2024 
 'International Tables Vol C Tables 4.2.6.8 and 6.1.1.4' 
 
_symmetry_cell_setting            Monoclinic
_symmetry_space_group_name_H-M    P2(1)/c  
 
loop_ 
 _symmetry_equiv_pos_as_xyz 
 'x, y, z' 
 '-x, y+1/2, -z+1/2' 
 '-x, -y, -z' 
 'x, -y-1/2, z-1/2' 
 
_cell_length_a                    12.103(8) 
_cell_length_b                    10.228(7) 
_cell_length_c                    11.123(7) 
_cell_angle_alpha                 90.00 
_cell_angle_beta                  114.342(5) 
_cell_angle_gamma                 90.00 
_cell_volume                      1254.6(14) 
_cell_formula_units_Z             4 
_cell_measurement_temperature     296(2) 
_cell_measurement_reflns_used     ? 
_cell_measurement_theta_min       ? 
_cell_measurement_theta_max       ? 
 
_exptl_crystal_description        block 
_exptl_crystal_colour             colourless
_exptl_crystal_size_max           0.21 
_exptl_crystal_size_mid           0.16 
_exptl_crystal_size_min           0.10 
_exptl_crystal_density_meas       ? 
_exptl_crystal_density_diffrn     1.967 
_exptl_crystal_density_method     'not measured' 
_exptl_crystal_F_000              728 
_exptl_absorpt_coefficient_mu     1.759 
_exptl_absorpt_correction_type    multi-scan 
_exptl_absorpt_correction_T_min   0.7089 
_exptl_absorpt_correction_T_max   0.8437 
_exptl_absorpt_process_details    SADABS 
 
_exptl_special_details 
; 
 ? 
; 
 
_diffrn_ambient_temperature       296(2) 
_diffrn_radiation_wavelength      0.71073 
_diffrn_radiation_type            MoK\a 
_diffrn_radiation_source          'fine-focus sealed tube' 
_diffrn_radiation_monochromator   graphite 
_diffrn_measurement_device_type   'Bruker APEX-II CCD'  
_diffrn_measurement_method        '\f and \w scans'  
_diffrn_detector_area_resol_mean  ? 
_diffrn_reflns_number             8702 
_diffrn_reflns_av_R_equivalents   0.0207 
_diffrn_reflns_av_sigmaI/netI     0.0194 
_diffrn_reflns_limit_h_min        -14 
_diffrn_reflns_limit_h_max        14 
_diffrn_reflns_limit_k_min        -12 
_diffrn_reflns_limit_k_max        10 
_diffrn_reflns_limit_l_min        -13 
_diffrn_reflns_limit_l_max        13 
_diffrn_reflns_theta_min          2.72 
_diffrn_reflns_theta_max          25.50 
_reflns_number_total              2330 
_reflns_number_gt                 2102 
_reflns_threshold_expression      >2sigma(I) 
 
_computing_data_collection        'Bruker APEX2' 
_computing_cell_refinement        'Bruker SAINT' 
_computing_data_reduction         'Bruker SAINT' 
_computing_structure_solution     'SHELXS-97 (Sheldrick, 2008)' 
_computing_structure_refinement   'SHELXL-97 (Sheldrick, 2008)' 
_computing_molecular_graphics     'Bruker SHELXTL' 
_computing_publication_material   'Bruker SHELXTL' 
 
_refine_special_details 
; 
 Refinement of F^2^ against ALL reflections.  The weighted R-factor wR and 
 goodness of fit S are based on F^2^, conventional R-factors R are based 
 on F, with F set to zero for negative F^2^. The threshold expression of 
 F^2^ > 2sigma(F^2^) is used only for calculating R-factors(gt) etc. and is 
 not relevant to the choice of reflections for refinement.  R-factors based 
 on F^2^ are statistically about twice as large as those based on F, and R- 
 factors based on ALL data will be even larger. 
; 
 
_refine_ls_structure_factor_coef  Fsqd  
_refine_ls_matrix_type            full 
_refine_ls_weighting_scheme       calc  
_refine_ls_weighting_details 
 'calc w=1/[\s^2^(Fo^2^)+(0.0233P)^2^+0.6887P] where P=(Fo^2^+2Fc^2^)/3' 
_atom_sites_solution_primary      direct 
_atom_sites_solution_secondary    difmap 
_atom_sites_solution_hydrogens    geom 
_refine_ls_hydrogen_treatment     mixed 
_refine_ls_extinction_method      none 
_refine_ls_extinction_coef        ? 
_refine_ls_number_reflns          2330 
_refine_ls_number_parameters      189 
_refine_ls_number_restraints      4 
_refine_ls_R_factor_all           0.0221 
_refine_ls_R_factor_gt            0.0185 
_refine_ls_wR_factor_ref          0.0472 
_refine_ls_wR_factor_gt           0.0446 
_refine_ls_goodness_of_fit_ref    1.075 
_refine_ls_restrained_S_all       1.080 
_refine_ls_shift/su_max           0.004 
_refine_ls_shift/su_mean          0.000 
 
loop_ 
 _atom_site_label 
 _atom_site_type_symbol 
 _atom_site_fract_x 
 _atom_site_fract_y 
 _atom_site_fract_z 
 _atom_site_U_iso_or_equiv 
 _atom_site_adp_type 
 _atom_site_occupancy 
 _atom_site_symmetry_multiplicity 
 _atom_site_calc_flag 
 _atom_site_refinement_flags 
 _atom_site_disorder_assembly 
 _atom_site_disorder_group 
O4 O 0.95257(16) 0.86346(16) 0.97198(17) 0.0292(4) Uani 1 1 d . . . 
C11 C 0.8910(2) 0.7866(2) 1.0084(2) 0.0227(5) Uani 1 1 d . . . 
O3 O 0.85823(19) 0.81640(18) 1.09707(18) 0.0408(5) Uani 1 1 d . . . 
C12 C 0.9132(2) 0.6062(2) 0.8695(2) 0.0222(5) Uani 1 1 d . . . 
H12 H 0.9753 0.6547 0.8626 0.027 Uiso 1 1 calc R . . 
C10 C 0.8550(2) 0.6570(2) 0.9428(2) 0.0214(5) Uani 1 1 d . . . 
C9 C 0.7612(2) 0.5859(2) 0.9518(2) 0.0241(5) Uani 1 1 d . . . 
H9 H 0.7199 0.6183 0.9998 0.029 Uiso 1 1 calc R . . 
C13 C 0.7946(2) 0.4230(2) 0.8187(2) 0.0228(5) Uani 1 1 d . . . 
H13 H 0.7745 0.3422 0.7769 0.027 Uiso 1 1 calc R . . 
C8 C 0.7295(2) 0.4663(2) 0.8887(2) 0.0218(5) Uani 1 1 d . . . 
N1 N 0.88488(19) 0.49132(19) 0.80810(19) 0.0231(4) Uani 1 1 d . . . 
Cd1 Cd 0.943540(15) 0.029278(16) 1.132795(15) 0.02031(7) Uani 1 1 d U . . 
O2 O 0.83472(15) 0.23745(17) 1.09855(16) 0.0280(4) Uani 1 1 d . . . 
O5 O 1.13666(17) -0.04360(18) 1.25177(18) 0.0308(4) Uani 1 1 d D . . 
C1 C 0.7542(2) 0.1925(2) 0.9935(2) 0.0228(5) Uani 1 1 d . . . 
O1 O 0.76802(16) 0.08646(18) 0.94565(18) 0.0344(4) Uani 1 1 d U . . 
C7 C 0.6240(2) 0.3902(2) 0.8878(2) 0.0226(5) Uani 1 1 d . . . 
C2 C 0.6354(2) 0.2609(2) 0.9302(2) 0.0220(5) Uani 1 1 d . . . 
C3 C 0.5332(2) 0.1916(3) 0.9213(3) 0.0317(6) Uani 1 1 d . . . 
H3 H 0.5412 0.1052 0.9495 0.038 Uiso 1 1 calc R . . 
C6 C 0.5092(3) 0.4461(3) 0.8368(3) 0.0367(6) Uani 1 1 d . . . 
H6 H 0.4998 0.5323 0.8078 0.044 Uiso 1 1 calc R . . 
C4 C 0.4208(2) 0.2494(3) 0.8713(3) 0.0395(7) Uani 1 1 d . . . 
H4 H 0.3531 0.2028 0.8666 0.047 Uiso 1 1 calc R . . 
C5 C 0.4092(2) 0.3761(3) 0.8285(3) 0.0440(7) Uani 1 1 d . . . 
H5 H 0.3331 0.4153 0.7935 0.053 Uiso 1 1 calc R . . 
H1W H 1.148(3) -0.110(3) 1.304(3) 0.062(11) Uiso 1 1 d D . . 
H2W H 1.166(3) -0.060(3) 1.193(3) 0.072(12) Uiso 1 1 d D . . 
 
loop_ 
 _atom_site_aniso_label 
 _atom_site_aniso_U_11 
 _atom_site_aniso_U_22 
 _atom_site_aniso_U_33 
 _atom_site_aniso_U_23 
 _atom_site_aniso_U_13 
 _atom_site_aniso_U_12 
O4 0.0384(10) 0.0189(9) 0.0389(10) -0.0013(7) 0.0245(8) -0.0061(8) 
C11 0.0258(13) 0.0203(12) 0.0233(12) 0.0005(10) 0.0114(10) -0.0005(10) 
O3 0.0647(14) 0.0309(11) 0.0434(11) -0.0155(9) 0.0388(11) -0.0178(10) 
C12 0.0262(13) 0.0209(12) 0.0211(11) 0.0005(10) 0.0112(10) -0.0033(10) 
C10 0.0273(13) 0.0193(12) 0.0184(11) 0.0009(9) 0.0103(10) -0.0013(10) 
C9 0.0304(13) 0.0208(12) 0.0257(12) 0.0002(10) 0.0163(11) 0.0006(10) 
C13 0.0302(13) 0.0165(11) 0.0236(12) -0.0008(10) 0.0130(10) -0.0032(10) 
C8 0.0257(13) 0.0171(12) 0.0241(12) 0.0038(10) 0.0117(10) 0.0009(10) 
N1 0.0296(11) 0.0202(10) 0.0240(10) -0.0020(8) 0.0157(9) -0.0031(8) 
Cd1 0.02546(11) 0.01759(11) 0.02173(10) 0.00090(7) 0.01362(8) 0.00059(7) 
O2 0.0250(9) 0.0296(10) 0.0270(9) 0.0008(7) 0.0083(7) 0.0013(7) 
O5 0.0296(10) 0.0344(11) 0.0281(9) 0.0041(8) 0.0114(8) 0.0021(8) 
C1 0.0243(12) 0.0196(12) 0.0291(12) 0.0036(10) 0.0154(10) -0.0030(10) 
O1 0.0310(10) 0.0252(10) 0.0437(10) -0.0065(8) 0.0122(8) 0.0035(8) 
C7 0.0256(13) 0.0204(13) 0.0253(12) -0.0005(10) 0.0141(10) -0.0012(10) 
C2 0.0227(12) 0.0210(12) 0.0239(12) -0.0022(9) 0.0111(10) -0.0029(10) 
C3 0.0290(14) 0.0254(14) 0.0427(15) 0.0010(12) 0.0167(12) -0.0057(11) 
C6 0.0338(15) 0.0304(15) 0.0473(16) 0.0122(12) 0.0182(13) 0.0096(12) 
C4 0.0250(15) 0.0438(18) 0.0533(18) -0.0039(15) 0.0197(13) -0.0069(13) 
C5 0.0230(15) 0.051(2) 0.0572(18) 0.0085(15) 0.0160(13) 0.0097(13) 
 
_geom_special_details 
; 
 All esds (except the esd in the dihedral angle between two l.s. planes) 
 are estimated using the full covariance matrix.  The cell esds are taken 
 into account individually in the estimation of esds in distances, angles 
 and torsion angles; correlations between esds in cell parameters are only 
 used when they are defined by crystal symmetry.  An approximate (isotropic) 
 treatment of cell esds is used for estimating esds involving l.s. planes. 
; 
 
loop_ 
 _geom_bond_atom_site_label_1 
 _geom_bond_atom_site_label_2 
 _geom_bond_distance 
 _geom_bond_site_symmetry_2 
 _geom_bond_publ_flag 
O4 C11 1.259(3) . ? 
O4 Cd1 2.3132(18) 3_767 ? 
O4 Cd1 2.500(2) 1_565 ? 
C11 O3 1.243(3) . ? 
C11 C10 1.489(3) . ? 
O3 Cd1 2.372(2) 1_565 ? 
C12 N1 1.331(3) . ? 
C12 C10 1.379(3) . ? 
C12 H12 0.9300 . ? 
C10 C9 1.387(3) . ? 
C9 C8 1.383(3) . ? 
C9 H9 0.9300 . ? 
C13 N1 1.343(3) . ? 
C13 C8 1.388(3) . ? 
C13 H13 0.9300 . ? 
C8 C7 1.493(3) . ? 
N1 Cd1 2.343(2) 4_565 ? 
Cd1 O5 2.285(2) . ? 
Cd1 O4 2.3132(18) 3_767 ? 
Cd1 N1 2.343(2) 4_566 ? 
Cd1 O1 2.354(2) . ? 
Cd1 O3 2.372(2) 1_545 ? 
Cd1 O2 2.450(2) . ? 
Cd1 O4 2.500(2) 1_545 ? 
O2 C1 1.260(3) . ? 
O5 H1W 0.863(17) . ? 
O5 H2W 0.878(17) . ? 
C1 O1 1.250(3) . ? 
C1 C2 1.489(3) . ? 
C7 C6 1.389(4) . ? 
C7 C2 1.392(3) . ? 
C2 C3 1.393(3) . ? 
C3 C4 1.373(4) . ? 
C3 H3 0.9300 . ? 
C6 C5 1.377(4) . ? 
C6 H6 0.9300 . ? 
C4 C5 1.368(4) . ? 
C4 H4 0.9300 . ? 
C5 H5 0.9300 . ? 
 
loop_ 
 _geom_angle_atom_site_label_1 
 _geom_angle_atom_site_label_2 
 _geom_angle_atom_site_label_3 
 _geom_angle 
 _geom_angle_site_symmetry_1 
 _geom_angle_site_symmetry_3 
 _geom_angle_publ_flag 
C11 O4 Cd1 167.06(16) . 3_767 ? 
C11 O4 Cd1 89.26(14) . 1_565 ? 
Cd1 O4 Cd1 103.41(7) 3_767 1_565 ? 
O3 C11 O4 121.8(2) . . ? 
O3 C11 C10 118.8(2) . . ? 
O4 C11 C10 119.4(2) . . ? 
C11 O3 Cd1 95.66(15) . 1_565 ? 
N1 C12 C10 123.4(2) . . ? 
N1 C12 H12 118.3 . . ? 
C10 C12 H12 118.3 . . ? 
C12 C10 C9 118.5(2) . . ? 
C12 C10 C11 120.5(2) . . ? 
C9 C10 C11 121.0(2) . . ? 
C8 C9 C10 119.4(2) . . ? 
C8 C9 H9 120.3 . . ? 
C10 C9 H9 120.3 . . ? 
N1 C13 C8 123.6(2) . . ? 
N1 C13 H13 118.2 . . ? 
C8 C13 H13 118.2 . . ? 
C9 C8 C13 117.7(2) . . ? 
C9 C8 C7 121.5(2) . . ? 
C13 C8 C7 120.7(2) . . ? 
C12 N1 C13 117.4(2) . . ? 
C12 N1 Cd1 113.84(14) . 4_565 ? 
C13 N1 Cd1 124.27(15) . 4_565 ? 
O5 Cd1 O4 78.92(8) . 3_767 ? 
O5 Cd1 N1 94.43(8) . 4_566 ? 
O4 Cd1 N1 151.15(7) 3_767 4_566 ? 
O5 Cd1 O1 158.13(6) . . ? 
O4 Cd1 O1 85.21(8) 3_767 . ? 
N1 Cd1 O1 106.60(8) 4_566 . ? 
O5 Cd1 O3 93.92(8) . 1_545 ? 
O4 Cd1 O3 129.82(6) 3_767 1_545 ? 
N1 Cd1 O3 78.27(7) 4_566 1_545 ? 
O1 Cd1 O3 84.73(8) . 1_545 ? 
O5 Cd1 O2 136.87(6) . . ? 
O4 Cd1 O2 83.02(7) 3_767 . ? 
N1 Cd1 O2 83.09(6) 4_566 . ? 
O1 Cd1 O2 54.21(6) . . ? 
O3 Cd1 O2 127.07(8) 1_545 . ? 
O5 Cd1 O4 81.78(7) . 1_545 ? 
O4 Cd1 O4 76.59(7) 3_767 1_545 ? 
N1 Cd1 O4 130.69(7) 4_566 1_545 ? 
O1 Cd1 O4 79.95(7) . 1_545 ? 
O3 Cd1 O4 53.26(6) 1_545 1_545 ? 
O2 Cd1 O4 131.13(6) . 1_545 ? 
C1 O2 Cd1 89.32(14) . . ? 
Cd1 O5 H1W 119(2) . . ? 
Cd1 O5 H2W 105(2) . . ? 
H1W O5 H2W 110(2) . . ? 
O1 C1 O2 121.5(2) . . ? 
O1 C1 C2 118.6(2) . . ? 
O2 C1 C2 119.6(2) . . ? 
C1 O1 Cd1 93.98(15) . . ? 
C6 C7 C2 118.2(2) . . ? 
C6 C7 C8 119.8(2) . . ? 
C2 C7 C8 121.9(2) . . ? 
C3 C2 C7 119.9(2) . . ? 
C3 C2 C1 116.8(2) . . ? 
C7 C2 C1 123.2(2) . . ? 
C4 C3 C2 120.8(3) . . ? 
C4 C3 H3 119.6 . . ? 
C2 C3 H3 119.6 . . ? 
C5 C6 C7 121.2(3) . . ? 
C5 C6 H6 119.4 . . ? 
C7 C6 H6 119.4 . . ? 
C5 C4 C3 119.4(3) . . ? 
C5 C4 H4 120.3 . . ? 
C3 C4 H4 120.3 . . ? 
C4 C5 C6 120.5(3) . . ? 
C4 C5 H5 119.7 . . ? 
C6 C5 H5 119.7 . . ? 
 
loop_ 
 _geom_torsion_atom_site_label_1 
 _geom_torsion_atom_site_label_2 
 _geom_torsion_atom_site_label_3 
 _geom_torsion_atom_site_label_4 
 _geom_torsion 
 _geom_torsion_site_symmetry_1 
 _geom_torsion_site_symmetry_2 
 _geom_torsion_site_symmetry_3 
 _geom_torsion_site_symmetry_4 
 _geom_torsion_publ_flag 
Cd1 O4 C11 O3 -170.2(6) 3_767 . . . ? 
Cd1 O4 C11 O3 -1.7(2) 1_565 . . . ? 
Cd1 O4 C11 C10 9.1(9) 3_767 . . . ? 
Cd1 O4 C11 C10 177.61(19) 1_565 . . . ? 
O4 C11 O3 Cd1 1.8(3) . . . 1_565 ? 
C10 C11 O3 Cd1 -177.51(18) . . . 1_565 ? 
N1 C12 C10 C9 -0.9(4) . . . . ? 
N1 C12 C10 C11 -179.7(2) . . . . ? 
O3 C11 C10 C12 -163.5(2) . . . . ? 
O4 C11 C10 C12 17.1(3) . . . . ? 
O3 C11 C10 C9 17.7(3) . . . . ? 
O4 C11 C10 C9 -161.6(2) . . . . ? 
C12 C10 C9 C8 0.7(3) . . . . ? 
C11 C10 C9 C8 179.5(2) . . . . ? 
C10 C9 C8 C13 0.1(3) . . . . ? 
C10 C9 C8 C7 -175.9(2) . . . . ? 
N1 C13 C8 C9 -0.8(4) . . . . ? 
N1 C13 C8 C7 175.2(2) . . . . ? 
C10 C12 N1 C13 0.3(3) . . . . ? 
C10 C12 N1 Cd1 157.67(18) . . . 4_565 ? 
C8 C13 N1 C12 0.6(3) . . . . ? 
C8 C13 N1 Cd1 -154.23(18) . . . 4_565 ? 
O5 Cd1 O2 C1 160.05(13) . . . . ? 
O4 Cd1 O2 C1 94.51(14) 3_767 . . . ? 
N1 Cd1 O2 C1 -110.84(14) 4_566 . . . ? 
O1 Cd1 O2 C1 5.40(12) . . . . ? 
O3 Cd1 O2 C1 -41.23(15) 1_545 . . . ? 
O4 Cd1 O2 C1 29.16(15) 1_545 . . . ? 
Cd1 O2 C1 O1 -9.7(2) . . . . ? 
Cd1 O2 C1 C2 165.15(18) . . . . ? 
O2 C1 O1 Cd1 10.1(2) . . . . ? 
C2 C1 O1 Cd1 -164.78(17) . . . . ? 
O5 Cd1 O1 C1 -133.69(18) . . . . ? 
O4 Cd1 O1 C1 -90.29(14) 3_767 . . . ? 
N1 Cd1 O1 C1 62.85(15) 4_566 . . . ? 
O3 Cd1 O1 C1 138.93(14) 1_545 . . . ? 
O2 Cd1 O1 C1 -5.45(12) . . . . ? 
O4 Cd1 O1 C1 -167.50(14) 1_545 . . . ? 
C9 C8 C7 C6 57.7(3) . . . . ? 
C13 C8 C7 C6 -118.1(3) . . . . ? 
C9 C8 C7 C2 -125.8(3) . . . . ? 
C13 C8 C7 C2 58.3(3) . . . . ? 
C6 C7 C2 C3 -0.2(3) . . . . ? 
C8 C7 C2 C3 -176.7(2) . . . . ? 
C6 C7 C2 C1 -176.5(2) . . . . ? 
C8 C7 C2 C1 7.1(3) . . . . ? 
O1 C1 C2 C3 57.9(3) . . . . ? 
O2 C1 C2 C3 -117.1(3) . . . . ? 
O1 C1 C2 C7 -125.8(3) . . . . ? 
O2 C1 C2 C7 59.2(3) . . . . ? 
C7 C2 C3 C4 -0.2(4) . . . . ? 
C1 C2 C3 C4 176.3(2) . . . . ? 
C2 C7 C6 C5 0.1(4) . . . . ? 
C8 C7 C6 C5 176.7(3) . . . . ? 
C2 C3 C4 C5 0.8(4) . . . . ? 
C3 C4 C5 C6 -0.9(4) . . . . ? 
C7 C6 C5 C4 0.4(5) . . . . ? 
 
loop_ 
 _geom_hbond_atom_site_label_D 
 _geom_hbond_atom_site_label_H 
 _geom_hbond_atom_site_label_A 
 _geom_hbond_distance_DH 
 _geom_hbond_distance_HA 
 _geom_hbond_distance_DA 
 _geom_hbond_angle_DHA 
 _geom_hbond_site_symmetry_A 
O5 H1W O2  0.863(17) 1.866(18) 2.726(3) 174(3) 2_747 
O5 H2W O1  0.878(17) 2.027(17) 2.904(3) 177(3) 3_757 
 
_diffrn_measured_fraction_theta_max    0.997 
_diffrn_reflns_theta_full              25.50 
_diffrn_measured_fraction_theta_full   0.997 
_refine_diff_density_max    0.294 
_refine_diff_density_min   -0.495 
_refine_diff_density_rms    0.071 

#===END
 
data_p21c (Compound 3) 
 
_audit_creation_method            SHELXL-97 
_chemical_name_systematic 
; 
 ? 
; 
_chemical_name_common             ? 
_chemical_melting_point           ? 
_chemical_formula_moiety          ? 
_chemical_formula_sum 
 'C23 H17 Cd N3 O5' 
_chemical_formula_weight          527.80 
 
loop_ 
 _atom_type_symbol 
 _atom_type_description 
 _atom_type_scat_dispersion_real 
 _atom_type_scat_dispersion_imag 
 _atom_type_scat_source 
 'C'  'C'   0.0033   0.0016 
 'International Tables Vol C Tables 4.2.6.8 and 6.1.1.4' 
 'H'  'H'   0.0000   0.0000 
 'International Tables Vol C Tables 4.2.6.8 and 6.1.1.4' 
 'N'  'N'   0.0061   0.0033 
 'International Tables Vol C Tables 4.2.6.8 and 6.1.1.4' 
 'O'  'O'   0.0106   0.0060 
 'International Tables Vol C Tables 4.2.6.8 and 6.1.1.4' 
 'Cd'  'Cd'  -0.8075   1.2024 
 'International Tables Vol C Tables 4.2.6.8 and 6.1.1.4' 
 
_symmetry_cell_setting            Monoclinic 
_symmetry_space_group_name_H-M    P2(1)/c 
 
loop_ 
 _symmetry_equiv_pos_as_xyz 
 'x, y, z' 
 '-x, y+1/2, -z+1/2' 
 '-x, -y, -z' 
 'x, -y-1/2, z-1/2' 
 
_cell_length_a                    16.639(6) 
_cell_length_b                    9.887(4) 
_cell_length_c                    13.205(5) 
_cell_angle_alpha                 90.00 
_cell_angle_beta                  106.768(3) 
_cell_angle_gamma                 90.00 
_cell_volume                      2079.9(13) 
_cell_formula_units_Z             4 
_cell_measurement_temperature     296(2) 
_cell_measurement_reflns_used     ? 
_cell_measurement_theta_min       ? 
_cell_measurement_theta_max       ? 
 
_exptl_crystal_description        block 
_exptl_crystal_colour             colourless 
_exptl_crystal_size_max           0.28 
_exptl_crystal_size_mid           0.26 
_exptl_crystal_size_min           0.24 
_exptl_crystal_density_meas       ? 
_exptl_crystal_density_diffrn     1.685 
_exptl_crystal_density_method     'not measured' 
_exptl_crystal_F_000              1056 
_exptl_absorpt_coefficient_mu     1.092 
_exptl_absorpt_correction_type    multi-scan 
_exptl_absorpt_correction_T_min   0.7497 
_exptl_absorpt_correction_T_max   0.7796 
_exptl_absorpt_process_details    SADABS 
 
_exptl_special_details 
; 
 ? 
; 
 
_diffrn_ambient_temperature       296(2) 
_diffrn_radiation_wavelength      0.71073 
_diffrn_radiation_type            MoK\a 
_diffrn_radiation_source          'fine-focus sealed tube' 
_diffrn_radiation_monochromator   graphite 
_diffrn_measurement_device_type   'Bruker APEX-II CCD' 
_diffrn_measurement_method        '\f and \w scans' 
_diffrn_detector_area_resol_mean  ? 
_diffrn_reflns_number             14562 
_diffrn_reflns_av_R_equivalents   0.0250 
_diffrn_reflns_av_sigmaI/netI     0.0239 
_diffrn_reflns_limit_h_min        -19 
_diffrn_reflns_limit_h_max        19 
_diffrn_reflns_limit_k_min        -11 
_diffrn_reflns_limit_k_max        11 
_diffrn_reflns_limit_l_min        -15 
_diffrn_reflns_limit_l_max        15 
_diffrn_reflns_theta_min          2.42 
_diffrn_reflns_theta_max          25.49 
_reflns_number_total              3835 
_reflns_number_gt                 3356 
_reflns_threshold_expression      >2sigma(I) 
 
_computing_data_collection        'Bruker APEX2' 
_computing_cell_refinement        'Bruker SAINT' 
_computing_data_reduction         'Bruker SAINT'  
_computing_structure_solution     'SHELXS-97 (Sheldrick, 2008)' 
_computing_structure_refinement   'SHELXL-97 (Sheldrick, 2008)' 
_computing_molecular_graphics     'Bruker SHELXTL' 
_computing_publication_material   'Bruker SHELXTL' 
 
_refine_special_details 
; 
 Refinement of F^2^ against ALL reflections.  The weighted R-factor wR and 
 goodness of fit S are based on F^2^, conventional R-factors R are based 
 on F, with F set to zero for negative F^2^. The threshold expression of 
 F^2^ > 2sigma(F^2^) is used only for calculating R-factors(gt) etc. and is 
 not relevant to the choice of reflections for refinement.  R-factors based 
 on F^2^ are statistically about twice as large as those based on F, and R- 
 factors based on ALL data will be even larger. 
; 
 
_refine_ls_structure_factor_coef  Fsqd  
_refine_ls_matrix_type            full 
_refine_ls_weighting_scheme       calc  
_refine_ls_weighting_details 
 'calc w=1/[\s^2^(Fo^2^)+(0.0302P)^2^+1.3311P] where P=(Fo^2^+2Fc^2^)/3' 
_atom_sites_solution_primary      direct 
_atom_sites_solution_secondary    difmap 
_atom_sites_solution_hydrogens    geom 
_refine_ls_hydrogen_treatment     mixed 
_refine_ls_extinction_method      none 
_refine_ls_extinction_coef        ? 
_refine_ls_number_reflns          3835 
_refine_ls_number_parameters      297 
_refine_ls_number_restraints      0 
_refine_ls_R_factor_all           0.0286 
_refine_ls_R_factor_gt            0.0229 
_refine_ls_wR_factor_ref          0.0585 
_refine_ls_wR_factor_gt           0.0550 
_refine_ls_goodness_of_fit_ref    0.998 
_refine_ls_restrained_S_all       0.998 
_refine_ls_shift/su_max           0.002 
_refine_ls_shift/su_mean          0.000 
 
loop_ 
 _atom_site_label 
 _atom_site_type_symbol 
 _atom_site_fract_x 
 _atom_site_fract_y 
 _atom_site_fract_z 
 _atom_site_U_iso_or_equiv 
 _atom_site_adp_type 
 _atom_site_occupancy 
 _atom_site_symmetry_multiplicity 
 _atom_site_calc_flag 
 _atom_site_refinement_flags 
 _atom_site_disorder_assembly 
 _atom_site_disorder_group 
Cd1 Cd 0.731637(10) 0.537900(16) 0.374494(13) 0.02497(7) Uani 1 1 d . . . 
N3 N 0.78531(12) 0.47259(19) 0.55073(15) 0.0252(4) Uani 1 1 d . . . 
C17 C 0.95162(15) 0.5732(2) 0.79972(19) 0.0264(5) Uani 1 1 d . . . 
C14 C 0.84073(15) 0.3940(2) 0.76038(19) 0.0277(5) Uani 1 1 d . . . 
H14 H 0.8598 0.3668 0.8307 0.033 Uiso 1 1 calc R . . 
C16 C 0.84903(15) 0.5366(2) 0.61889(19) 0.0267(5) Uani 1 1 d . . . 
H16 H 0.8748 0.6076 0.5941 0.032 Uiso 1 1 calc R . . 
C15 C 0.87862(15) 0.5020(2) 0.72508(18) 0.0242(5) Uani 1 1 d . . . 
C22 C 0.94370(15) 0.6989(2) 0.84467(19) 0.0273(5) Uani 1 1 d . . . 
N2 N 0.66517(13) 0.7361(2) 0.41280(16) 0.0320(5) Uani 1 1 d . . . 
C6 C 0.58265(15) 0.7315(2) 0.40205(18) 0.0270(5) Uani 1 1 d . . . 
N1 N 0.59125(13) 0.4908(2) 0.37385(16) 0.0274(4) Uani 1 1 d . . . 
C11 C 0.74890(14) 0.3699(2) 0.58705(19) 0.0255(5) Uani 1 1 d . . . 
H11 H 0.7042 0.3257 0.5399 0.031 Uiso 1 1 calc R . . 
C2 C 0.47471(17) 0.3406(3) 0.3489(2) 0.0363(6) Uani 1 1 d . . . 
H2 H 0.4538 0.2528 0.3392 0.044 Uiso 1 1 calc R . . 
C12 C 0.77420(14) 0.3265(2) 0.69052(18) 0.0239(5) Uani 1 1 d . . . 
C9 C 0.6631(2) 0.9756(3) 0.4349(2) 0.0459(7) Uani 1 1 d . . . 
H9 H 0.6919 1.0574 0.4456 0.055 Uiso 1 1 calc R . . 
C8 C 0.57883(19) 0.9705(3) 0.4248(2) 0.0431(7) Uani 1 1 d . . . 
H8 H 0.5496 1.0493 0.4294 0.052 Uiso 1 1 calc R . . 
C5 C 0.54205(15) 0.5956(2) 0.38153(18) 0.0265(5) Uani 1 1 d . . . 
C18 C 1.02699(17) 0.5074(3) 0.8288(2) 0.0430(7) Uani 1 1 d . . . 
H18 H 1.0320 0.4237 0.7991 0.052 Uiso 1 1 calc R . . 
C3 C 0.42374(17) 0.4480(3) 0.3553(2) 0.0389(6) Uani 1 1 d . . . 
H3 H 0.3673 0.4339 0.3491 0.047 Uiso 1 1 calc R . . 
C7 C 0.53777(17) 0.8482(3) 0.4080(2) 0.0357(6) Uani 1 1 d . . . 
H7 H 0.4805 0.8437 0.4008 0.043 Uiso 1 1 calc R . . 
C21 C 1.01312(17) 0.7522(3) 0.9194(2) 0.0360(6) Uani 1 1 d . . . 
H21 H 1.0082 0.8343 0.9514 0.043 Uiso 1 1 calc R . . 
C20 C 1.08873(17) 0.6862(3) 0.9471(2) 0.0422(7) Uani 1 1 d . . . 
H20 H 1.1348 0.7244 0.9963 0.051 Uiso 1 1 calc R . . 
C1 C 0.55765(16) 0.3671(3) 0.3573(2) 0.0325(6) Uani 1 1 d . . . 
H1 H 0.5920 0.2953 0.3510 0.039 Uiso 1 1 calc R . . 
C19 C 1.09639(18) 0.5639(3) 0.9019(3) 0.0488(8) Uani 1 1 d . . . 
H19 H 1.1477 0.5189 0.9201 0.059 Uiso 1 1 calc R . . 
C4 C 0.45718(16) 0.5766(3) 0.3711(2) 0.0355(6) Uani 1 1 d . . . 
H4 H 0.4232 0.6501 0.3747 0.043 Uiso 1 1 calc R . . 
C10 C 0.70365(18) 0.8563(3) 0.4287(2) 0.0405(7) Uani 1 1 d . . . 
H10 H 0.7609 0.8592 0.4360 0.049 Uiso 1 1 calc R . . 
C13 C 0.73066(15) 0.2073(2) 0.72277(19) 0.0277(5) Uani 1 1 d . . . 
O1 O 0.67309(11) 0.15311(17) 0.65245(14) 0.0375(4) Uani 1 1 d . . . 
O2 O 0.75575(12) 0.17174(18) 0.81843(14) 0.0395(5) Uani 1 1 d . . . 
C23 C 0.86262(17) 0.7777(3) 0.8160(2) 0.0335(6) Uani 1 1 d . . . 
O4 O 0.81496(15) 0.7682(2) 0.72512(18) 0.0688(7) Uani 1 1 d . . . 
O3 O 0.84971(11) 0.8494(2) 0.88761(15) 0.0448(5) Uani 1 1 d . . . 
O5 O 0.66871(13) 0.6110(2) 0.19762(15) 0.0367(4) Uani 1 1 d . . . 
H1W H 0.665(2) 0.530(4) 0.167(3) 0.072(12) Uiso 1 1 d . . . 
H2W H 0.716(2) 0.648(4) 0.197(3) 0.061(11) Uiso 1 1 d . . . 
 
loop_ 
 _atom_site_aniso_label 
 _atom_site_aniso_U_11 
 _atom_site_aniso_U_22 
 _atom_site_aniso_U_33 
 _atom_site_aniso_U_23 
 _atom_site_aniso_U_13 
 _atom_site_aniso_U_12 
Cd1 0.02780(11) 0.02491(10) 0.02205(10) 0.00108(7) 0.00697(7) 0.00325(7) 
N3 0.0288(11) 0.0242(10) 0.0220(10) 0.0012(8) 0.0064(8) -0.0001(8) 
C17 0.0299(13) 0.0260(12) 0.0223(12) 0.0020(10) 0.0058(10) -0.0027(10) 
C14 0.0309(13) 0.0271(12) 0.0240(13) 0.0032(10) 0.0061(10) 0.0017(10) 
C16 0.0310(13) 0.0245(12) 0.0255(13) 0.0009(10) 0.0098(10) -0.0017(10) 
C15 0.0255(12) 0.0234(11) 0.0234(12) -0.0026(9) 0.0064(10) 0.0005(9) 
C22 0.0291(13) 0.0294(12) 0.0243(13) 0.0002(10) 0.0094(10) -0.0042(10) 
N2 0.0319(12) 0.0292(11) 0.0335(12) -0.0068(9) 0.0071(10) 0.0006(9) 
C6 0.0338(14) 0.0290(12) 0.0174(12) -0.0005(10) 0.0063(10) 0.0050(10) 
N1 0.0293(11) 0.0278(10) 0.0243(11) -0.0016(8) 0.0065(9) 0.0012(8) 
C11 0.0251(12) 0.0243(12) 0.0251(12) -0.0019(10) 0.0041(10) -0.0003(10) 
C2 0.0389(15) 0.0377(15) 0.0307(14) -0.0023(11) 0.0074(12) -0.0089(12) 
C12 0.0256(12) 0.0228(11) 0.0234(12) 0.0015(9) 0.0068(10) 0.0006(9) 
C9 0.0557(19) 0.0305(15) 0.0520(19) -0.0107(13) 0.0163(15) -0.0034(13) 
C8 0.0572(19) 0.0295(14) 0.0441(17) -0.0048(12) 0.0170(14) 0.0128(13) 
C5 0.0296(13) 0.0311(12) 0.0187(12) 0.0014(10) 0.0066(10) 0.0032(10) 
C18 0.0334(15) 0.0389(15) 0.0522(19) -0.0107(13) 0.0051(13) 0.0018(12) 
C3 0.0296(14) 0.0515(17) 0.0352(15) 0.0027(13) 0.0087(12) -0.0042(12) 
C7 0.0371(15) 0.0378(14) 0.0338(15) -0.0014(11) 0.0129(12) 0.0093(12) 
C21 0.0382(16) 0.0366(14) 0.0329(15) -0.0072(11) 0.0094(12) -0.0115(12) 
C20 0.0306(15) 0.0556(18) 0.0346(16) 0.0036(13) 0.0002(12) -0.0147(13) 
C1 0.0354(14) 0.0301(13) 0.0312(14) -0.0033(11) 0.0084(11) -0.0009(11) 
C19 0.0259(15) 0.0576(19) 0.055(2) 0.0036(15) -0.0010(13) 0.0055(13) 
C4 0.0303(14) 0.0419(15) 0.0343(15) 0.0018(12) 0.0095(11) 0.0062(11) 
C10 0.0382(15) 0.0343(14) 0.0473(17) -0.0122(12) 0.0095(13) -0.0040(12) 
C13 0.0283(13) 0.0243(12) 0.0310(14) 0.0028(10) 0.0092(11) 0.0016(10) 
O1 0.0353(10) 0.0307(9) 0.0385(11) 0.0056(8) -0.0019(8) -0.0087(8) 
O2 0.0516(12) 0.0362(10) 0.0268(10) 0.0079(8) 0.0050(8) -0.0154(9) 
C23 0.0352(15) 0.0294(13) 0.0367(16) -0.0023(11) 0.0115(12) -0.0010(11) 
O4 0.0655(15) 0.0784(16) 0.0464(13) -0.0230(12) -0.0094(11) 0.0415(13) 
O3 0.0371(11) 0.0542(12) 0.0434(12) -0.0174(10) 0.0119(9) 0.0068(9) 
O5 0.0393(12) 0.0335(10) 0.0338(11) -0.0007(9) 0.0050(9) 0.0044(9) 
 
_geom_special_details 
; 
 All esds (except the esd in the dihedral angle between two l.s. planes) 
 are estimated using the full covariance matrix.  The cell esds are taken 
 into account individually in the estimation of esds in distances, angles 
 and torsion angles; correlations between esds in cell parameters are only 
 used when they are defined by crystal symmetry.  An approximate (isotropic) 
 treatment of cell esds is used for estimating esds involving l.s. planes. 
; 
 
loop_ 
 _geom_bond_atom_site_label_1 
 _geom_bond_atom_site_label_2 
 _geom_bond_distance 
 _geom_bond_site_symmetry_2 
 _geom_bond_publ_flag 
Cd1 O3 2.2214(19) 4_575 ? 
Cd1 O2 2.2752(18) 4_565 ? 
Cd1 N3 2.330(2) . ? 
Cd1 N2 2.376(2) . ? 
Cd1 N1 2.379(2) . ? 
Cd1 O5 2.380(2) . ? 
N3 C16 1.336(3) . ? 
N3 C11 1.340(3) . ? 
C17 C18 1.366(4) . ? 
C17 C22 1.399(3) . ? 
C17 C15 1.501(3) . ? 
C14 C15 1.387(3) . ? 
C14 C12 1.390(3) . ? 
C16 C15 1.388(3) . ? 
C22 C21 1.389(3) . ? 
C22 C23 1.508(4) . ? 
N2 C10 1.337(3) . ? 
N2 C6 1.340(3) . ? 
C6 C7 1.389(3) . ? 
C6 C5 1.493(3) . ? 
N1 C1 1.337(3) . ? 
N1 C5 1.342(3) . ? 
C11 C12 1.377(3) . ? 
C2 C3 1.377(4) . ? 
C2 C1 1.377(4) . ? 
C12 C13 1.508(3) . ? 
C9 C8 1.370(4) . ? 
C9 C10 1.374(4) . ? 
C8 C7 1.375(4) . ? 
C5 C4 1.391(3) . ? 
C18 C19 1.391(4) . ? 
C3 C4 1.380(4) . ? 
C21 C20 1.370(4) . ? 
C20 C19 1.371(4) . ? 
C13 O1 1.246(3) . ? 
C13 O2 1.261(3) . ? 
O2 Cd1 2.2753(18) 4_566 ? 
C23 O4 1.236(3) . ? 
C23 O3 1.250(3) . ? 
O3 Cd1 2.2214(19) 4_576 ? 
 
loop_ 
 _geom_angle_atom_site_label_1 
 _geom_angle_atom_site_label_2 
 _geom_angle_atom_site_label_3 
 _geom_angle 
 _geom_angle_site_symmetry_1 
 _geom_angle_site_symmetry_3 
 _geom_angle_publ_flag 
O3 Cd1 O2 104.32(8) 4_575 4_565 ? 
O3 Cd1 N3 89.18(7) 4_575 . ? 
O2 Cd1 N3 91.13(7) 4_565 . ? 
O3 Cd1 N2 91.44(8) 4_575 . ? 
O2 Cd1 N2 163.25(7) 4_565 . ? 
N3 Cd1 N2 94.81(7) . . ? 
O3 Cd1 N1 160.66(7) 4_575 . ? 
O2 Cd1 N1 94.92(7) 4_565 . ? 
N3 Cd1 N1 92.43(7) . . ? 
N2 Cd1 N1 69.22(7) . . ? 
O3 Cd1 O5 93.04(7) 4_575 . ? 
O2 Cd1 O5 91.50(7) 4_565 . ? 
N3 Cd1 O5 176.04(7) . . ? 
N2 Cd1 O5 81.86(7) . . ? 
N1 Cd1 O5 84.40(7) . . ? 
C16 N3 C11 118.1(2) . . ? 
C16 N3 Cd1 122.86(15) . . ? 
C11 N3 Cd1 119.00(15) . . ? 
C18 C17 C22 119.7(2) . . ? 
C18 C17 C15 117.7(2) . . ? 
C22 C17 C15 122.5(2) . . ? 
C15 C14 C12 119.9(2) . . ? 
N3 C16 C15 123.0(2) . . ? 
C14 C15 C16 117.8(2) . . ? 
C14 C15 C17 120.1(2) . . ? 
C16 C15 C17 122.1(2) . . ? 
C21 C22 C17 118.5(2) . . ? 
C21 C22 C23 118.9(2) . . ? 
C17 C22 C23 122.6(2) . . ? 
C10 N2 C6 118.5(2) . . ? 
C10 N2 Cd1 122.36(18) . . ? 
C6 N2 Cd1 118.37(16) . . ? 
N2 C6 C7 121.1(2) . . ? 
N2 C6 C5 116.5(2) . . ? 
C7 C6 C5 122.4(2) . . ? 
C1 N1 C5 118.9(2) . . ? 
C1 N1 Cd1 122.91(17) . . ? 
C5 N1 Cd1 117.92(16) . . ? 
N3 C11 C12 123.4(2) . . ? 
C3 C2 C1 118.0(2) . . ? 
C11 C12 C14 117.7(2) . . ? 
C11 C12 C13 119.3(2) . . ? 
C14 C12 C13 122.9(2) . . ? 
C8 C9 C10 118.0(3) . . ? 
C9 C8 C7 119.7(2) . . ? 
N1 C5 C4 120.8(2) . . ? 
N1 C5 C6 117.0(2) . . ? 
C4 C5 C6 122.2(2) . . ? 
C17 C18 C19 121.0(3) . . ? 
C2 C3 C4 119.4(3) . . ? 
C8 C7 C6 119.3(3) . . ? 
C20 C21 C22 121.3(3) . . ? 
C21 C20 C19 119.9(3) . . ? 
N1 C1 C2 123.3(2) . . ? 
C20 C19 C18 119.6(3) . . ? 
C3 C4 C5 119.5(2) . . ? 
N2 C10 C9 123.4(3) . . ? 
O1 C13 O2 126.0(2) . . ? 
O1 C13 C12 117.0(2) . . ? 
O2 C13 C12 117.0(2) . . ? 
C13 O2 Cd1 122.77(16) . 4_566 ? 
O4 C23 O3 125.1(3) . . ? 
O4 C23 C22 118.8(2) . . ? 
O3 C23 C22 116.1(2) . . ? 
C23 O3 Cd1 124.54(18) . 4_576 ? 
 
loop_ 
 _geom_hbond_atom_site_label_D 
 _geom_hbond_atom_site_label_H 
 _geom_hbond_atom_site_label_A 
 _geom_hbond_distance_DH 
 _geom_hbond_distance_HA 
 _geom_hbond_distance_DA 
 _geom_hbond_angle_DHA 
 _geom_hbond_site_symmetry_A 
O5 H2W O4  0.87(4) 1.78(4) 2.640(3) 168(3) 4_575 
O5 H1W O1  0.89(4) 1.83(4) 2.684(3) 160(4) 4_565 
 
_diffrn_measured_fraction_theta_max    0.995 
_diffrn_reflns_theta_full              25.49 
_diffrn_measured_fraction_theta_full   0.995 
_refine_diff_density_max    0.396 
_refine_diff_density_min   -0.422 
_refine_diff_density_rms    0.072 

#===END
 
data_p21c (Compound 4)
 
_audit_creation_method            SHELXL-97 
_chemical_name_systematic 
; 
 ? 
; 
_chemical_name_common             ? 
_chemical_melting_point           ? 
_chemical_formula_moiety          ? 
_chemical_formula_sum 
 'C23 H17 Co N3 O5' 
_chemical_formula_weight          474.33 
 
loop_ 
 _atom_type_symbol 
 _atom_type_description 
 _atom_type_scat_dispersion_real 
 _atom_type_scat_dispersion_imag 
 _atom_type_scat_source 
 'C'  'C'   0.0033   0.0016 
 'International Tables Vol C Tables 4.2.6.8 and 6.1.1.4' 
 'H'  'H'   0.0000   0.0000 
 'International Tables Vol C Tables 4.2.6.8 and 6.1.1.4' 
 'N'  'N'   0.0061   0.0033 
 'International Tables Vol C Tables 4.2.6.8 and 6.1.1.4' 
 'O'  'O'   0.0106   0.0060 
 'International Tables Vol C Tables 4.2.6.8 and 6.1.1.4' 
 'Co'  'Co'   0.3494   0.9721 
 'International Tables Vol C Tables 4.2.6.8 and 6.1.1.4' 
 
_symmetry_cell_setting            Monoclinic 
_symmetry_space_group_name_H-M    P2(1)/c 
 
loop_ 
 _symmetry_equiv_pos_as_xyz 
 'x, y, z' 
 '-x, y+1/2, -z+1/2' 
 '-x, -y, -z' 
 'x, -y-1/2, z-1/2' 
 
_cell_length_a                    16.603(12) 
_cell_length_b                    9.712(7) 
_cell_length_c                    12.777(9) 
_cell_angle_alpha                 90.00 
_cell_angle_beta                  105.503(6) 
_cell_angle_gamma                 90.00 
_cell_volume                      1985(2) 
_cell_formula_units_Z             4 
_cell_measurement_temperature     296(2) 
_cell_measurement_reflns_used     ? 
_cell_measurement_theta_min       ? 
_cell_measurement_theta_max       ? 
 
_exptl_crystal_description        block
_exptl_crystal_colour             pink 
_exptl_crystal_size_max           0.28 
_exptl_crystal_size_mid           0.26 
_exptl_crystal_size_min           0.24 
_exptl_crystal_density_meas       ? 
_exptl_crystal_density_diffrn     1.587 
_exptl_crystal_density_method     'not measured' 
_exptl_crystal_F_000              972 
_exptl_absorpt_coefficient_mu     0.908 
_exptl_absorpt_correction_type    multi-scan 
_exptl_absorpt_correction_T_min   0.7851 
_exptl_absorpt_correction_T_max   0.8115 
_exptl_absorpt_process_details    SADABS  
 
_exptl_special_details 
; 
 ? 
; 
 
_diffrn_ambient_temperature       296(2) 
_diffrn_radiation_wavelength      0.71073 
_diffrn_radiation_type            MoK\a 
_diffrn_radiation_source          'fine-focus sealed tube' 
_diffrn_radiation_monochromator   graphite 
_diffrn_measurement_device_type   'Bruker APEX-II CCD' 
_diffrn_measurement_method        '\f and \w scans' 
_diffrn_detector_area_resol_mean  ? 
_diffrn_reflns_number             13965 
_diffrn_reflns_av_R_equivalents   0.0602 
_diffrn_reflns_av_sigmaI/netI     0.0843 
_diffrn_reflns_limit_h_min        -18 
_diffrn_reflns_limit_h_max        20 
_diffrn_reflns_limit_k_min        -11 
_diffrn_reflns_limit_k_max        11 
_diffrn_reflns_limit_l_min        -15 
_diffrn_reflns_limit_l_max        14 
_diffrn_reflns_theta_min          2.45 
_diffrn_reflns_theta_max          25.50 
_reflns_number_total              3681 
_reflns_number_gt                 2884 
_reflns_threshold_expression      >2sigma(I) 
 
_computing_data_collection        'Bruker APEX2' 
_computing_cell_refinement        'Bruker SAINT' 
_computing_data_reduction         'Bruker SAINT' 
_computing_structure_solution     'SHELXS-97 (Sheldrick, 2008)' 
_computing_structure_refinement   'SHELXL-97 (Sheldrick, 2008)' 
_computing_molecular_graphics     'Bruker SHELXTL'  
_computing_publication_material   'Bruker SHELXTL'  
 
_refine_special_details 
; 
 Refinement of F^2^ against ALL reflections.  The weighted R-factor wR and 
 goodness of fit S are based on F^2^, conventional R-factors R are based 
 on F, with F set to zero for negative F^2^. The threshold expression of 
 F^2^ > 2sigma(F^2^) is used only for calculating R-factors(gt) etc. and is 
 not relevant to the choice of reflections for refinement.  R-factors based 
 on F^2^ are statistically about twice as large as those based on F, and R- 
 factors based on ALL data will be even larger. 
; 
 
_refine_ls_structure_factor_coef  Fsqd  
_refine_ls_matrix_type            full 
_refine_ls_weighting_scheme       calc  
_refine_ls_weighting_details 
 'calc w=1/[\s^2^(Fo^2^)+(0.0000P)^2^+1.5006P] where P=(Fo^2^+2Fc^2^)/3' 
_atom_sites_solution_primary      direct 
_atom_sites_solution_secondary    difmap 
_atom_sites_solution_hydrogens    geom 
_refine_ls_hydrogen_treatment     mixed 
_refine_ls_extinction_method      none 
_refine_ls_extinction_coef        ? 
_refine_ls_number_reflns          3681 
_refine_ls_number_parameters      294 
_refine_ls_number_restraints      0 
_refine_ls_R_factor_all           0.0602 
_refine_ls_R_factor_gt            0.0437 
_refine_ls_wR_factor_ref          0.1134 
_refine_ls_wR_factor_gt           0.1042 
_refine_ls_goodness_of_fit_ref    1.026 
_refine_ls_restrained_S_all       1.026 
_refine_ls_shift/su_max           0.000 
_refine_ls_shift/su_mean          0.000 
 
loop_ 
 _atom_site_label 
 _atom_site_type_symbol 
 _atom_site_fract_x 
 _atom_site_fract_y 
 _atom_site_fract_z 
 _atom_site_U_iso_or_equiv 
 _atom_site_adp_type 
 _atom_site_occupancy 
 _atom_site_symmetry_multiplicity 
 _atom_site_calc_flag 
 _atom_site_refinement_flags 
 _atom_site_disorder_assembly 
 _atom_site_disorder_group 
Co1 Co 0.22577(3) 0.03357(4) 0.37749(3) 0.02294(15) Uani 1 1 d . . . 
N3 N 0.27823(16) -0.0265(2) 0.5442(2) 0.0239(6) Uani 1 1 d . . . 
N1 N 0.09960(17) -0.0194(2) 0.3778(2) 0.0262(6) Uani 1 1 d . . . 
N2 N 0.17464(16) 0.2230(2) 0.4217(2) 0.0276(6) Uani 1 1 d . . . 
C15 C 0.3697(2) 0.0084(3) 0.7226(3) 0.0260(7) Uani 1 1 d . . . 
C16 C 0.3406(2) 0.0415(3) 0.6124(3) 0.0275(7) Uani 1 1 d . . . 
H16 H 0.3658 0.1139 0.5855 0.033 Uiso 1 1 calc R . . 
C14 C 0.3335(2) -0.1017(3) 0.7610(3) 0.0272(7) Uani 1 1 d . . . 
H14 H 0.3524 -0.1276 0.8335 0.033 Uiso 1 1 calc R . . 
C5 C 0.0495(2) 0.0882(3) 0.3844(2) 0.0262(7) Uani 1 1 d . . . 
C6 C 0.0919(2) 0.2236(3) 0.4090(2) 0.0259(7) Uani 1 1 d . . . 
C11 C 0.2440(2) -0.1320(3) 0.5842(3) 0.0254(7) Uani 1 1 d . . . 
H11 H 0.2008 -0.1801 0.5370 0.031 Uiso 1 1 calc R . . 
C17 C 0.4425(2) 0.0851(3) 0.7978(2) 0.0274(7) Uani 1 1 d . . . 
C8 C 0.0926(2) 0.4662(3) 0.4381(3) 0.0374(9) Uani 1 1 d . . . 
H8 H 0.0650 0.5480 0.4440 0.045 Uiso 1 1 calc R . . 
C22 C 0.4325(2) 0.2178(3) 0.8379(3) 0.0288(7) Uani 1 1 d . . . 
C12 C 0.26876(19) -0.1737(3) 0.6910(2) 0.0240(7) Uani 1 1 d . . . 
C2 C -0.0184(2) -0.1702(3) 0.3471(3) 0.0331(8) Uani 1 1 d . . . 
H2 H -0.0396 -0.2593 0.3369 0.040 Uiso 1 1 calc R . . 
C1 C 0.0653(2) -0.1446(3) 0.3589(3) 0.0292(7) Uani 1 1 d . . . 
H1 H 0.0996 -0.2183 0.3533 0.035 Uiso 1 1 calc R . . 
C18 C 0.5144(2) 0.0209(4) 0.8299(3) 0.0434(10) Uani 1 1 d . . . 
H18 H 0.5198 -0.0661 0.8021 0.052 Uiso 1 1 calc R . . 
C7 C 0.0490(2) 0.3448(3) 0.4171(3) 0.0322(8) Uani 1 1 d . . . 
H7 H -0.0084 0.3434 0.4085 0.039 Uiso 1 1 calc R . . 
C9 C 0.1774(2) 0.4661(3) 0.4501(3) 0.0406(9) Uani 1 1 d . . . 
H9 H 0.2080 0.5474 0.4632 0.049 Uiso 1 1 calc R . . 
C10 C 0.2158(2) 0.3420(3) 0.4423(3) 0.0366(8) Uani 1 1 d . . . 
H10 H 0.2734 0.3414 0.4520 0.044 Uiso 1 1 calc R . . 
C3 C -0.0698(2) -0.0592(4) 0.3510(3) 0.0372(8) Uani 1 1 d . . . 
H3 H -0.1269 -0.0721 0.3409 0.045 Uiso 1 1 calc R . . 
C4 C -0.0355(2) 0.0706(3) 0.3702(3) 0.0340(8) Uani 1 1 d . . . 
H4 H -0.0693 0.1459 0.3734 0.041 Uiso 1 1 calc R . . 
C20 C 0.5755(2) 0.2094(4) 0.9457(3) 0.0415(9) Uani 1 1 d . . . 
H20 H 0.6207 0.2508 0.9945 0.050 Uiso 1 1 calc R . . 
C21 C 0.4998(2) 0.2770(3) 0.9132(3) 0.0361(8) Uani 1 1 d . . . 
H21 H 0.4937 0.3631 0.9420 0.043 Uiso 1 1 calc R . . 
C19 C 0.5837(2) 0.0799(4) 0.9053(3) 0.0498(10) Uani 1 1 d . . . 
H19 H 0.6340 0.0324 0.9274 0.060 Uiso 1 1 calc R . . 
C13 C 0.22480(19) -0.2945(3) 0.7261(3) 0.0257(7) Uani 1 1 d . . . 
C23 C 0.3519(2) 0.2982(3) 0.8042(3) 0.0332(8) Uani 1 1 d . . . 
O1 O 0.16308(14) -0.3416(2) 0.65614(18) 0.0338(6) Uani 1 1 d . . . 
O2 O 0.25245(14) -0.3387(2) 0.82221(17) 0.0312(5) Uani 1 1 d . . . 
O3 O 0.33579(14) 0.3724(2) 0.87664(18) 0.0344(6) Uani 1 1 d . . . 
O4 O 0.30820(18) 0.2879(3) 0.7094(2) 0.0647(9) Uani 1 1 d . . . 
O5 O 0.16596(16) 0.1035(2) 0.21373(18) 0.0329(5) Uani 1 1 d . . . 
H1W H 0.1554 0.0371 0.1728 0.049 Uiso 1 1 calc R . . 
H2W H 0.215(3) 0.143(4) 0.200(3) 0.065(14) Uiso 1 1 d . . . 
 
loop_ 
 _atom_site_aniso_label 
 _atom_site_aniso_U_11 
 _atom_site_aniso_U_22 
 _atom_site_aniso_U_33 
 _atom_site_aniso_U_23 
 _atom_site_aniso_U_13 
 _atom_site_aniso_U_12 
Co1 0.0272(3) 0.0209(2) 0.0212(3) -0.00012(16) 0.00723(19) 0.00065(17) 
N3 0.0283(15) 0.0242(12) 0.0201(14) 0.0008(10) 0.0078(12) 0.0011(11) 
N1 0.0316(15) 0.0258(13) 0.0222(14) 0.0001(11) 0.0088(12) 0.0013(11) 
N2 0.0330(16) 0.0237(13) 0.0263(15) -0.0036(11) 0.0083(12) -0.0004(11) 
C15 0.0268(18) 0.0245(15) 0.0266(18) -0.0011(13) 0.0070(14) 0.0023(13) 
C16 0.0342(19) 0.0247(15) 0.0255(18) -0.0031(13) 0.0113(15) -0.0025(13) 
C14 0.0342(19) 0.0257(15) 0.0222(17) 0.0033(13) 0.0085(14) 0.0002(14) 
C5 0.0307(19) 0.0294(16) 0.0199(17) 0.0018(13) 0.0091(14) 0.0001(14) 
C6 0.0293(18) 0.0294(16) 0.0202(16) 0.0025(13) 0.0087(14) 0.0038(13) 
C11 0.0296(18) 0.0230(15) 0.0242(17) -0.0001(12) 0.0080(14) -0.0007(13) 
C17 0.042(2) 0.0201(14) 0.0186(16) 0.0007(12) 0.0052(14) -0.0013(14) 
C8 0.049(2) 0.0270(17) 0.038(2) -0.0018(15) 0.0154(18) 0.0095(16) 
C22 0.0296(18) 0.0317(16) 0.0254(18) 0.0010(13) 0.0080(15) -0.0036(14) 
C12 0.0292(18) 0.0240(15) 0.0203(16) 0.0003(12) 0.0092(13) 0.0007(13) 
C2 0.039(2) 0.0340(17) 0.0269(18) -0.0033(14) 0.0101(16) -0.0107(15) 
C1 0.0348(19) 0.0272(16) 0.0262(18) 0.0006(13) 0.0091(15) -0.0008(14) 
C18 0.037(2) 0.0365(19) 0.057(3) -0.0185(18) 0.014(2) -0.0062(16) 
C7 0.035(2) 0.0316(17) 0.0316(19) 0.0007(14) 0.0129(16) 0.0085(14) 
C9 0.053(3) 0.0248(17) 0.044(2) -0.0075(15) 0.0138(19) -0.0045(16) 
C10 0.037(2) 0.0324(18) 0.041(2) -0.0069(15) 0.0118(17) -0.0027(15) 
C3 0.0254(19) 0.050(2) 0.034(2) -0.0007(16) 0.0053(16) -0.0077(16) 
C4 0.031(2) 0.0408(19) 0.031(2) 0.0019(15) 0.0100(16) 0.0057(15) 
C20 0.033(2) 0.048(2) 0.040(2) -0.0012(17) 0.0030(17) -0.0130(17) 
C21 0.042(2) 0.0305(17) 0.035(2) -0.0038(15) 0.0077(17) -0.0079(15) 
C19 0.034(2) 0.051(2) 0.058(3) 0.002(2) 0.0005(19) 0.0051(18) 
C13 0.0279(18) 0.0231(15) 0.0270(18) 0.0004(13) 0.0092(15) 0.0007(13) 
C23 0.036(2) 0.0322(17) 0.030(2) -0.0045(15) 0.0069(16) 0.0003(15) 
O1 0.0345(14) 0.0291(11) 0.0323(13) 0.0063(10) -0.0007(11) -0.0064(10) 
O2 0.0388(14) 0.0298(11) 0.0241(12) 0.0056(9) 0.0067(10) -0.0086(10) 
O3 0.0367(14) 0.0347(12) 0.0312(13) -0.0085(10) 0.0083(11) 0.0013(10) 
O4 0.0628(19) 0.081(2) 0.0378(17) -0.0199(14) -0.0086(14) 0.0408(16) 
O5 0.0358(14) 0.0313(12) 0.0298(14) -0.0006(10) 0.0055(11) 0.0044(11) 
 
_geom_special_details 
; 
 All esds (except the esd in the dihedral angle between two l.s. planes) 
 are estimated using the full covariance matrix.  The cell esds are taken 
 into account individually in the estimation of esds in distances, angles 
 and torsion angles; correlations between esds in cell parameters are only 
 used when they are defined by crystal symmetry.  An approximate (isotropic) 
 treatment of cell esds is used for estimating esds involving l.s. planes. 
; 
 
loop_ 
 _geom_bond_atom_site_label_1 
 _geom_bond_atom_site_label_2 
 _geom_bond_distance 
 _geom_bond_site_symmetry_2 
 _geom_bond_publ_flag 
Co1 O3 2.045(3) 4_565 ? 
Co1 O2 2.108(2) 4 ? 
Co1 N3 2.155(3) . ? 
Co1 N1 2.158(3) . ? 
Co1 N2 2.163(3) . ? 
Co1 O5 2.171(3) . ? 
N3 C16 1.337(4) . ? 
N3 C11 1.337(4) . ? 
N1 C1 1.338(4) . ? 
N1 C5 1.353(4) . ? 
N2 C10 1.333(4) . ? 
N2 C6 1.339(4) . ? 
C15 C14 1.379(4) . ? 
C15 C16 1.398(4) . ? 
C15 C17 1.523(4) . ? 
C14 C12 1.389(4) . ? 
C5 C4 1.385(5) . ? 
C5 C6 1.484(4) . ? 
C6 C7 1.395(4) . ? 
C11 C12 1.377(4) . ? 
C17 C18 1.311(5) . ? 
C17 C22 1.413(4) . ? 
C8 C7 1.372(5) . ? 
C8 C9 1.374(5) . ? 
C22 C21 1.389(4) . ? 
C22 C23 1.510(5) . ? 
C12 C13 1.512(4) . ? 
C2 C1 1.379(5) . ? 
C2 C3 1.384(5) . ? 
C18 C19 1.410(5) . ? 
C9 C10 1.380(5) . ? 
C3 C4 1.377(5) . ? 
C20 C19 1.380(5) . ? 
C20 C21 1.380(5) . ? 
C13 O1 1.253(4) . ? 
C13 O2 1.265(4) . ? 
C23 O4 1.239(4) . ? 
C23 O3 1.257(4) . ? 
O2 Co1 2.108(2) 4_556 ? 
O3 Co1 2.045(3) 4_566 ? 
 
loop_ 
 _geom_angle_atom_site_label_1 
 _geom_angle_atom_site_label_2 
 _geom_angle_atom_site_label_3 
 _geom_angle 
 _geom_angle_site_symmetry_1 
 _geom_angle_site_symmetry_3 
 _geom_angle_publ_flag 
O3 Co1 O2 97.53(10) 4_565 4 ? 
O3 Co1 N3 90.03(9) 4_565 . ? 
O2 Co1 N3 91.28(9) 4 . ? 
O3 Co1 N1 167.26(9) 4_565 . ? 
O2 Co1 N1 94.46(9) 4 . ? 
N3 Co1 N1 94.01(10) . . ? 
O3 Co1 N2 92.01(10) 4_565 . ? 
O2 Co1 N2 169.46(9) 4 . ? 
N3 Co1 N2 93.19(10) . . ? 
N1 Co1 N2 75.72(10) . . ? 
O3 Co1 O5 91.96(10) 4_565 . ? 
O2 Co1 O5 92.35(9) 4 . ? 
N3 Co1 O5 175.60(9) . . ? 
N1 Co1 O5 83.23(10) . . ? 
N2 Co1 O5 82.82(10) . . ? 
C16 N3 C11 117.6(3) . . ? 
C16 N3 Co1 123.3(2) . . ? 
C11 N3 Co1 119.0(2) . . ? 
C1 N1 C5 118.3(3) . . ? 
C1 N1 Co1 125.7(2) . . ? 
C5 N1 Co1 115.5(2) . . ? 
C10 N2 C6 118.4(3) . . ? 
C10 N2 Co1 124.9(2) . . ? 
C6 N2 Co1 115.66(19) . . ? 
C14 C15 C16 118.0(3) . . ? 
C14 C15 C17 120.2(3) . . ? 
C16 C15 C17 121.7(3) . . ? 
N3 C16 C15 122.8(3) . . ? 
C15 C14 C12 119.8(3) . . ? 
N1 C5 C4 121.2(3) . . ? 
N1 C5 C6 115.6(3) . . ? 
C4 C5 C6 123.2(3) . . ? 
N2 C6 C7 121.5(3) . . ? 
N2 C6 C5 115.8(3) . . ? 
C7 C6 C5 122.7(3) . . ? 
N3 C11 C12 124.0(3) . . ? 
C18 C17 C22 120.4(3) . . ? 
C18 C17 C15 117.8(3) . . ? 
C22 C17 C15 121.6(3) . . ? 
C7 C8 C9 119.5(3) . . ? 
C21 C22 C17 118.5(3) . . ? 
C21 C22 C23 118.1(3) . . ? 
C17 C22 C23 123.3(3) . . ? 
C11 C12 C14 117.7(3) . . ? 
C11 C12 C13 118.8(3) . . ? 
C14 C12 C13 123.5(3) . . ? 
C1 C2 C3 117.9(3) . . ? 
N1 C1 C2 123.5(3) . . ? 
C17 C18 C19 121.9(3) . . ? 
C8 C7 C6 119.1(3) . . ? 
C8 C9 C10 118.2(3) . . ? 
N2 C10 C9 123.3(3) . . ? 
C4 C3 C2 119.3(3) . . ? 
C3 C4 C5 119.6(3) . . ? 
C19 C20 C21 119.6(3) . . ? 
C20 C21 C22 120.7(3) . . ? 
C20 C19 C18 118.8(3) . . ? 
O1 C13 O2 125.8(3) . . ? 
O1 C13 C12 116.0(3) . . ? 
O2 C13 C12 118.2(3) . . ? 
O4 C23 O3 125.6(3) . . ? 
O4 C23 C22 118.7(3) . . ? 
O3 C23 C22 115.7(3) . . ? 
C13 O2 Co1 125.13(19) . 4_556 ? 
C23 O3 Co1 128.8(2) . 4_566 ? 
 
loop_ 
 _geom_hbond_atom_site_label_D 
 _geom_hbond_atom_site_label_H 
 _geom_hbond_atom_site_label_A 
 _geom_hbond_distance_DH 
 _geom_hbond_distance_HA 
 _geom_hbond_distance_DA 
 _geom_hbond_angle_DHA 
 _geom_hbond_site_symmetry_A 
O5 H2W O4  0.96(4) 1.66(4) 2.600(4) 166(4) 4_565 
O5 H1W O1  0.82 1.92 2.645(3) 147.2 4 
 
_diffrn_measured_fraction_theta_max    0.996 
_diffrn_reflns_theta_full              25.50 
_diffrn_measured_fraction_theta_full   0.996 
_refine_diff_density_max    0.626 
_refine_diff_density_min   -0.312 
_refine_diff_density_rms    0.068 

#===END
 
data_p21c (Compound 5)
 
_audit_creation_method            SHELXL-97 
_chemical_name_systematic 
; 
 ? 
; 
_chemical_name_common             ? 
_chemical_melting_point           ? 
_chemical_formula_moiety          ? 
_chemical_formula_sum 
 'C23 H17 Mn N3 O5' 
_chemical_formula_weight          470.34 
 
loop_ 
 _atom_type_symbol 
 _atom_type_description 
 _atom_type_scat_dispersion_real 
 _atom_type_scat_dispersion_imag 
 _atom_type_scat_source 
 'C'  'C'   0.0033   0.0016 
 'International Tables Vol C Tables 4.2.6.8 and 6.1.1.4' 
 'H'  'H'   0.0000   0.0000 
 'International Tables Vol C Tables 4.2.6.8 and 6.1.1.4' 
 'N'  'N'   0.0061   0.0033 
 'International Tables Vol C Tables 4.2.6.8 and 6.1.1.4' 
 'O'  'O'   0.0106   0.0060 
 'International Tables Vol C Tables 4.2.6.8 and 6.1.1.4' 
 'Mn'  'Mn'   0.3368   0.7283 
 'International Tables Vol C Tables 4.2.6.8 and 6.1.1.4' 
 
_symmetry_cell_setting            Monoclinic
_symmetry_space_group_name_H-M    P2(1)/c 
 
loop_ 
 _symmetry_equiv_pos_as_xyz 
 'x, y, z' 
 '-x, y+1/2, -z+1/2' 
 '-x, -y, -z' 
 'x, -y-1/2, z-1/2' 
 
_cell_length_a                    16.567(4) 
_cell_length_b                    9.838(2) 
_cell_length_c                    13.030(3) 
_cell_angle_alpha                 90.00 
_cell_angle_beta                  105.955(2) 
_cell_angle_gamma                 90.00 
_cell_volume                      2041.9(8) 
_cell_formula_units_Z             4 
_cell_measurement_temperature     296(2) 
_cell_measurement_reflns_used     ? 
_cell_measurement_theta_min       ? 
_cell_measurement_theta_max       ? 
 
_exptl_crystal_description        block  
_exptl_crystal_colour             yellow 
_exptl_crystal_size_max           0.28 
_exptl_crystal_size_mid           0.24 
_exptl_crystal_size_min           0.24 
_exptl_crystal_density_meas       ? 
_exptl_crystal_density_diffrn     1.530 
_exptl_crystal_density_method     'not measured' 
_exptl_crystal_F_000              964 
_exptl_absorpt_coefficient_mu     0.689 
_exptl_absorpt_correction_type    multi-scan  
_exptl_absorpt_correction_T_min   0.8305 
_exptl_absorpt_correction_T_max   0.8521 
_exptl_absorpt_process_details    SADABS  
 
_exptl_special_details 
; 
 ? 
; 
 
_diffrn_ambient_temperature       296(2) 
_diffrn_radiation_wavelength      0.71073 
_diffrn_radiation_type            MoK\a 
_diffrn_radiation_source          'fine-focus sealed tube' 
_diffrn_radiation_monochromator   graphite 
_diffrn_measurement_device_type   'Bruker APEX-II CCD' 
_diffrn_measurement_method        '\f and \w scans'  
_diffrn_detector_area_resol_mean  ? 
_diffrn_reflns_number             9470 
_diffrn_reflns_av_R_equivalents   0.0693 
_diffrn_reflns_av_sigmaI/netI     0.1151 
_diffrn_reflns_limit_h_min        -17 
_diffrn_reflns_limit_h_max        20 
_diffrn_reflns_limit_k_min        -11 
_diffrn_reflns_limit_k_max        11 
_diffrn_reflns_limit_l_min        -15 
_diffrn_reflns_limit_l_max        10 
_diffrn_reflns_theta_min          2.43 
_diffrn_reflns_theta_max          25.49 
_reflns_number_total              3761 
_reflns_number_gt                 2507 
_reflns_threshold_expression      >2sigma(I) 
 
_computing_data_collection        'Bruker APEX2'  
_computing_cell_refinement        'Bruker SAINT'
_computing_data_reduction         'Bruker SAINT' 
_computing_structure_solution     'SHELXS-97 (Sheldrick, 2008)' 
_computing_structure_refinement   'SHELXL-97 (Sheldrick, 2008)' 
_computing_molecular_graphics     'Bruker SHELXTL' 
_computing_publication_material   'Bruker SHELXTL' 
 
_refine_special_details 
; 
 Refinement of F^2^ against ALL reflections.  The weighted R-factor wR and 
 goodness of fit S are based on F^2^, conventional R-factors R are based 
 on F, with F set to zero for negative F^2^. The threshold expression of 
 F^2^ > 2sigma(F^2^) is used only for calculating R-factors(gt) etc. and is 
 not relevant to the choice of reflections for refinement.  R-factors based 
 on F^2^ are statistically about twice as large as those based on F, and R- 
 factors based on ALL data will be even larger. 
; 
 
_refine_ls_structure_factor_coef  Fsqd  
_refine_ls_matrix_type            full 
_refine_ls_weighting_scheme       calc  
_refine_ls_weighting_details 
 'calc w=1/[\s^2^(Fo^2^)+(0.0000P)^2^+0.0000P] where P=(Fo^2^+2Fc^2^)/3' 
_atom_sites_solution_primary      direct 
_atom_sites_solution_secondary    difmap 
_atom_sites_solution_hydrogens    geom 
_refine_ls_hydrogen_treatment     constr 
_refine_ls_extinction_method      none 
_refine_ls_extinction_coef        ? 
_refine_ls_number_reflns          3761 
_refine_ls_number_parameters      290 
_refine_ls_number_restraints      0 
_refine_ls_R_factor_all           0.0910 
_refine_ls_R_factor_gt            0.0542 
_refine_ls_wR_factor_ref          0.1363 
_refine_ls_wR_factor_gt           0.1178 
_refine_ls_goodness_of_fit_ref    1.038 
_refine_ls_restrained_S_all       1.038 
_refine_ls_shift/su_max           0.000 
_refine_ls_shift/su_mean          0.000 
 
loop_ 
 _atom_site_label 
 _atom_site_type_symbol 
 _atom_site_fract_x 
 _atom_site_fract_y 
 _atom_site_fract_z 
 _atom_site_U_iso_or_equiv 
 _atom_site_adp_type 
 _atom_site_occupancy 
 _atom_site_symmetry_multiplicity 
 _atom_site_calc_flag 
 _atom_site_refinement_flags 
 _atom_site_disorder_assembly 
 _atom_site_disorder_group 
Mn1 Mn 0.73036(4) 0.53256(6) 0.37358(4) 0.0271(2) Uani 1 1 d . . . 
N3 N 0.78353(19) 0.4716(3) 0.5456(2) 0.0283(8) Uani 1 1 d . . . 
N2 N 0.6704(2) 0.7260(3) 0.4182(2) 0.0302(8) Uani 1 1 d . . . 
C5 C 0.5449(2) 0.5898(4) 0.3823(3) 0.0281(9) Uani 1 1 d . . . 
C14 C 0.8363(2) 0.3958(4) 0.7584(3) 0.0308(9) Uani 1 1 d . . . 
H14 H 0.8543 0.3701 0.8297 0.037 Uiso 1 1 calc R . . 
C16 C 0.8462(2) 0.5360(4) 0.6151(3) 0.0284(9) Uani 1 1 d . . . 
H16 H 0.8726 0.6070 0.5899 0.034 Uiso 1 1 calc R . . 
C15 C 0.8743(2) 0.5037(4) 0.7221(3) 0.0268(9) Uani 1 1 d . . . 
C17 C 0.9456(2) 0.5772(4) 0.7976(3) 0.0294(9) Uani 1 1 d . . . 
C6 C 0.5869(2) 0.7245(4) 0.4062(3) 0.0277(9) Uani 1 1 d . . . 
O5 O 0.66847(18) 0.6044(3) 0.2069(2) 0.0371(7) Uani 1 1 d . . . 
H1W H 0.7149 0.6397 0.2027 0.12(3) Uiso 1 1 d R . . 
H2W H 0.6626 0.5402 0.1653 0.187 Uiso 1 1 d R . . 
N1 N 0.59488(19) 0.4836(3) 0.3753(2) 0.0304(8) Uani 1 1 d . . . 
C11 C 0.7474(2) 0.3680(4) 0.5839(3) 0.0275(9) Uani 1 1 d . . . 
H11 H 0.7036 0.3220 0.5369 0.033 Uiso 1 1 calc R . . 
C12 C 0.7716(2) 0.3262(4) 0.6888(3) 0.0266(9) Uani 1 1 d . . . 
C22 C 0.9363(2) 0.7062(4) 0.8388(3) 0.0308(9) Uani 1 1 d . . . 
C2 C 0.4776(3) 0.3346(4) 0.3478(3) 0.0386(11) Uani 1 1 d . . . 
H2 H 0.4567 0.2464 0.3378 0.046 Uiso 1 1 calc R . . 
C20 C 1.0801(3) 0.6952(5) 0.9465(3) 0.0440(12) Uani 1 1 d . . . 
H20 H 1.1253 0.7351 0.9959 0.053 Uiso 1 1 calc R . . 
C8 C 0.5860(3) 0.9635(4) 0.4321(3) 0.0446(11) Uani 1 1 d . . . 
H8 H 0.5577 1.0436 0.4378 0.053 Uiso 1 1 calc R . . 
C1 C 0.5602(3) 0.3611(4) 0.3577(3) 0.0340(10) Uani 1 1 d . . . 
H1 H 0.5945 0.2884 0.3516 0.041 Uiso 1 1 calc R . . 
C18 C 1.0197(3) 0.5124(4) 0.8312(4) 0.0460(12) Uani 1 1 d . . . 
H18 H 1.0252 0.4268 0.8036 0.055 Uiso 1 1 calc R . . 
C9 C 0.6702(3) 0.9661(4) 0.4431(4) 0.0470(12) Uani 1 1 d . . . 
H9 H 0.7000 1.0474 0.4547 0.056 Uiso 1 1 calc R . . 
C3 C 0.4260(3) 0.4436(4) 0.3532(3) 0.0412(11) Uani 1 1 d . . . 
H3 H 0.3690 0.4305 0.3449 0.049 Uiso 1 1 calc R . . 
C4 C 0.4604(2) 0.5715(4) 0.3709(3) 0.0367(10) Uani 1 1 d . . . 
H4 H 0.4267 0.6457 0.3752 0.044 Uiso 1 1 calc R . . 
C21 C 1.0047(3) 0.7621(4) 0.9140(3) 0.0389(11) Uani 1 1 d . . . 
H21 H 0.9991 0.8468 0.9430 0.047 Uiso 1 1 calc R . . 
C7 C 0.5430(3) 0.8429(4) 0.4127(3) 0.0359(10) Uani 1 1 d . . . 
H7 H 0.4854 0.8405 0.4040 0.043 Uiso 1 1 calc R . . 
C10 C 0.7097(3) 0.8452(4) 0.4365(3) 0.0422(11) Uani 1 1 d . . . 
H10 H 0.7674 0.8466 0.4452 0.051 Uiso 1 1 calc R . . 
C19 C 1.0884(3) 0.5687(5) 0.9055(4) 0.0516(13) Uani 1 1 d . . . 
H19 H 1.1389 0.5217 0.9271 0.062 Uiso 1 1 calc R . . 
C13 C 0.7272(2) 0.2068(4) 0.7209(3) 0.0302(9) Uani 1 1 d . . . 
O1 O 0.66770(16) 0.1561(3) 0.6507(2) 0.0385(7) Uani 1 1 d . . . 
C23 C 0.8565(3) 0.7867(4) 0.8065(3) 0.0347(10) Uani 1 1 d . . . 
O4 O 0.8111(2) 0.7735(3) 0.7137(2) 0.0682(11) Uani 1 1 d . . . 
O2 O 0.75261(17) 0.1662(3) 0.8171(2) 0.0379(7) Uani 1 1 d . . . 
O3 O 0.84105(17) 0.8614(3) 0.8759(2) 0.0415(7) Uani 1 1 d . . . 
 
loop_ 
 _atom_site_aniso_label 
 _atom_site_aniso_U_11 
 _atom_site_aniso_U_22 
 _atom_site_aniso_U_33 
 _atom_site_aniso_U_23 
 _atom_site_aniso_U_13 
 _atom_site_aniso_U_12 
Mn1 0.0289(4) 0.0267(3) 0.0250(3) 0.0011(3) 0.0061(3) 0.0019(3) 
N3 0.0320(19) 0.0282(18) 0.0244(18) 0.0032(15) 0.0072(15) -0.0026(15) 
N2 0.0279(19) 0.0308(19) 0.0302(19) -0.0061(15) 0.0051(15) 0.0001(15) 
C5 0.033(2) 0.031(2) 0.019(2) -0.0016(17) 0.0065(18) 0.0037(19) 
C14 0.035(2) 0.031(2) 0.023(2) 0.0003(18) 0.0020(18) -0.0052(19) 
C16 0.038(2) 0.023(2) 0.026(2) -0.0004(18) 0.0133(19) -0.0038(18) 
C15 0.028(2) 0.028(2) 0.024(2) -0.0020(16) 0.0065(17) 0.0021(17) 
C17 0.038(2) 0.025(2) 0.023(2) -0.0007(17) 0.0051(19) -0.0025(18) 
C6 0.034(2) 0.030(2) 0.019(2) 0.0000(17) 0.0079(18) 0.0055(18) 
O5 0.0376(18) 0.0350(16) 0.0341(17) 0.0016(13) 0.0020(13) 0.0046(14) 
N1 0.0311(19) 0.0306(19) 0.0287(19) -0.0032(15) 0.0067(15) -0.0005(16) 
C11 0.029(2) 0.028(2) 0.023(2) -0.0020(17) 0.0032(17) 0.0003(18) 
C12 0.027(2) 0.025(2) 0.027(2) 0.0009(17) 0.0074(18) 0.0020(17) 
C22 0.027(2) 0.036(2) 0.029(2) -0.0028(18) 0.0054(18) -0.0031(18) 
C2 0.047(3) 0.042(3) 0.027(2) -0.005(2) 0.009(2) -0.013(2) 
C20 0.035(3) 0.050(3) 0.038(3) 0.002(2) -0.004(2) -0.012(2) 
C8 0.056(3) 0.035(3) 0.042(3) -0.007(2) 0.013(2) 0.007(2) 
C1 0.039(3) 0.030(2) 0.031(2) -0.0002(18) 0.0058(19) -0.0006(19) 
C18 0.039(3) 0.040(3) 0.055(3) -0.012(2) 0.007(2) 0.000(2) 
C9 0.054(3) 0.032(2) 0.054(3) -0.015(2) 0.014(2) -0.007(2) 
C3 0.028(2) 0.057(3) 0.036(3) -0.002(2) 0.005(2) -0.007(2) 
C4 0.030(2) 0.043(3) 0.037(3) 0.000(2) 0.009(2) 0.007(2) 
C21 0.040(3) 0.037(2) 0.037(3) -0.006(2) 0.006(2) -0.011(2) 
C7 0.036(2) 0.038(2) 0.035(2) 0.000(2) 0.011(2) 0.011(2) 
C10 0.040(3) 0.038(3) 0.047(3) -0.012(2) 0.010(2) -0.006(2) 
C19 0.033(3) 0.059(3) 0.054(3) 0.004(2) -0.004(2) 0.002(2) 
C13 0.033(2) 0.024(2) 0.034(2) 0.0036(18) 0.010(2) 0.0044(18) 
O1 0.0346(17) 0.0345(16) 0.0383(17) 0.0057(13) -0.0036(14) -0.0100(13) 
C23 0.037(3) 0.034(2) 0.032(3) -0.003(2) 0.008(2) -0.002(2) 
O4 0.069(2) 0.077(2) 0.042(2) -0.0238(18) -0.0126(18) 0.0409(19) 
O2 0.0464(18) 0.0375(16) 0.0266(16) 0.0079(13) 0.0046(13) -0.0102(13) 
O3 0.0373(17) 0.0446(18) 0.0413(17) -0.0146(15) 0.0083(14) 0.0051(14) 
 
_geom_special_details 
; 
 All esds (except the esd in the dihedral angle between two l.s. planes) 
 are estimated using the full covariance matrix.  The cell esds are taken 
 into account individually in the estimation of esds in distances, angles 
 and torsion angles; correlations between esds in cell parameters are only 
 used when they are defined by crystal symmetry.  An approximate (isotropic) 
 treatment of cell esds is used for estimating esds involving l.s. planes. 
; 
 
loop_ 
 _geom_bond_atom_site_label_1 
 _geom_bond_atom_site_label_2 
 _geom_bond_distance 
 _geom_bond_site_symmetry_2 
 _geom_bond_publ_flag 
Mn1 O3 2.103(3) 4_575 ? 
Mn1 O2 2.156(3) 4_565 ? 
Mn1 O5 2.245(3) . ? 
Mn1 N3 2.252(3) . ? 
Mn1 N2 2.295(3) . ? 
Mn1 N1 2.302(3) . ? 
N3 C16 1.336(4) . ? 
N3 C11 1.346(4) . ? 
N2 C10 1.330(5) . ? 
N2 C6 1.350(4) . ? 
C5 N1 1.351(5) . ? 
C5 C4 1.379(5) . ? 
C5 C6 1.489(5) . ? 
C14 C12 1.380(5) . ? 
C14 C15 1.382(5) . ? 
C16 C15 1.380(5) . ? 
C15 C17 1.499(5) . ? 
C17 C18 1.345(5) . ? 
C17 C22 1.403(5) . ? 
C6 C7 1.388(5) . ? 
N1 C1 1.328(5) . ? 
C11 C12 1.377(5) . ? 
C12 C13 1.505(5) . ? 
C22 C21 1.391(5) . ? 
C22 C23 1.499(5) . ? 
C2 C1 1.363(5) . ? 
C2 C3 1.386(5) . ? 
C20 C21 1.371(6) . ? 
C20 C19 1.376(6) . ? 
C8 C9 1.362(6) . ? 
C8 C7 1.371(6) . ? 
C18 C19 1.391(6) . ? 
C9 C10 1.372(5) . ? 
C3 C4 1.374(5) . ? 
C13 O1 1.249(4) . ? 
C13 O2 1.272(4) . ? 
C23 O4 1.242(5) . ? 
C23 O3 1.246(4) . ? 
O2 Mn1 2.156(3) 4_566 ? 
O3 Mn1 2.103(3) 4_576 ? 
 
loop_ 
 _geom_angle_atom_site_label_1 
 _geom_angle_atom_site_label_2 
 _geom_angle_atom_site_label_3 
 _geom_angle 
 _geom_angle_site_symmetry_1 
 _geom_angle_site_symmetry_3 
 _geom_angle_publ_flag 
O3 Mn1 O2 102.97(11) 4_575 4_565 ? 
O3 Mn1 O5 91.29(11) 4_575 . ? 
O2 Mn1 O5 91.77(10) 4_565 . ? 
O3 Mn1 N3 90.95(11) 4_575 . ? 
O2 Mn1 N3 92.36(10) 4_565 . ? 
O5 Mn1 N3 174.74(11) . . ? 
O3 Mn1 N2 91.22(11) 4_575 . ? 
O2 Mn1 N2 164.84(11) 4_565 . ? 
O5 Mn1 N2 82.51(10) . . ? 
N3 Mn1 N2 92.69(11) . . ? 
O3 Mn1 N1 162.28(11) 4_575 . ? 
O2 Mn1 N1 94.15(11) 4_565 . ? 
O5 Mn1 N1 83.56(11) . . ? 
N3 Mn1 N1 92.90(11) . . ? 
N2 Mn1 N1 71.33(11) . . ? 
C16 N3 C11 116.7(3) . . ? 
C16 N3 Mn1 124.6(2) . . ? 
C11 N3 Mn1 118.6(2) . . ? 
C10 N2 C6 117.9(3) . . ? 
C10 N2 Mn1 123.5(3) . . ? 
C6 N2 Mn1 117.5(2) . . ? 
N1 C5 C4 121.0(4) . . ? 
N1 C5 C6 116.3(3) . . ? 
C4 C5 C6 122.7(4) . . ? 
C12 C14 C15 120.1(4) . . ? 
N3 C16 C15 124.1(3) . . ? 
C16 C15 C14 117.6(3) . . ? 
C16 C15 C17 122.6(3) . . ? 
C14 C15 C17 119.8(3) . . ? 
C18 C17 C22 119.4(4) . . ? 
C18 C17 C15 118.0(3) . . ? 
C22 C17 C15 122.5(3) . . ? 
N2 C6 C7 121.4(4) . . ? 
N2 C6 C5 116.1(3) . . ? 
C7 C6 C5 122.5(4) . . ? 
C1 N1 C5 118.0(3) . . ? 
C1 N1 Mn1 124.4(3) . . ? 
C5 N1 Mn1 117.2(2) . . ? 
N3 C11 C12 123.9(3) . . ? 
C11 C12 C14 117.7(3) . . ? 
C11 C12 C13 118.6(3) . . ? 
C14 C12 C13 123.7(3) . . ? 
C21 C22 C17 118.2(4) . . ? 
C21 C22 C23 118.3(4) . . ? 
C17 C22 C23 123.5(3) . . ? 
C1 C2 C3 117.7(4) . . ? 
C21 C20 C19 119.6(4) . . ? 
C9 C8 C7 120.0(4) . . ? 
N1 C1 C2 124.4(4) . . ? 
C17 C18 C19 122.4(4) . . ? 
C8 C9 C10 118.0(4) . . ? 
C4 C3 C2 119.0(4) . . ? 
C3 C4 C5 119.9(4) . . ? 
C20 C21 C22 121.6(4) . . ? 
C8 C7 C6 118.9(4) . . ? 
N2 C10 C9 123.8(4) . . ? 
C20 C19 C18 118.7(4) . . ? 
O1 C13 O2 125.2(4) . . ? 
O1 C13 C12 117.1(3) . . ? 
O2 C13 C12 117.7(3) . . ? 
O4 C23 O3 125.3(4) . . ? 
O4 C23 C22 118.0(4) . . ? 
O3 C23 C22 116.7(4) . . ? 
C13 O2 Mn1 125.4(2) . 4_566 ? 
C23 O3 Mn1 129.4(3) . 4_576 ? 
 
loop_ 
 _geom_hbond_atom_site_label_D 
 _geom_hbond_atom_site_label_H 
 _geom_hbond_atom_site_label_A 
 _geom_hbond_distance_DH 
 _geom_hbond_distance_HA 
 _geom_hbond_distance_DA 
 _geom_hbond_angle_DHA 
 _geom_hbond_site_symmetry_A 
O5 H2W O1  0.82 1.94 2.664(4) 146.0 4_565 
O5 H1W O3  0.86 2.62 3.111(4) 117.3 4_575 
O5 H1W O4  0.86 1.78 2.631(4) 170.7 4_575 
 
_diffrn_measured_fraction_theta_max    0.992 
_diffrn_reflns_theta_full              25.49 
_diffrn_measured_fraction_theta_full   0.992 
_refine_diff_density_max    0.326 
_refine_diff_density_min   -0.381 
_refine_diff_density_rms    0.076 

#===END
 
data_p1 (Compound 6)
 
_audit_creation_method            SHELXL-97 
_chemical_name_systematic 
; 
 ? 
; 
_chemical_name_common             ? 
_chemical_melting_point           ? 
_chemical_formula_moiety          ? 
_chemical_formula_sum 
 'C25 H17 Co N3 O5' 
_chemical_formula_weight          498.35 
 
loop_ 
 _atom_type_symbol 
 _atom_type_description 
 _atom_type_scat_dispersion_real 
 _atom_type_scat_dispersion_imag 
 _atom_type_scat_source 
 'C'  'C'   0.0033   0.0016 
 'International Tables Vol C Tables 4.2.6.8 and 6.1.1.4' 
 'H'  'H'   0.0000   0.0000 
 'International Tables Vol C Tables 4.2.6.8 and 6.1.1.4' 
 'Co'  'Co'   0.3494   0.9721 
 'International Tables Vol C Tables 4.2.6.8 and 6.1.1.4' 
 'O'  'O'   0.0106   0.0060 
 'International Tables Vol C Tables 4.2.6.8 and 6.1.1.4' 
 'N'  'N'   0.0061   0.0033 
 'International Tables Vol C Tables 4.2.6.8 and 6.1.1.4' 
 
_symmetry_cell_setting            Triclinic 
_symmetry_space_group_name_H-M    P-1 
 
loop_ 
 _symmetry_equiv_pos_as_xyz 
 'x, y, z' 
 '-x, -y, -z' 
 
_cell_length_a                    9.4178(6) 
_cell_length_b                    10.2005(7) 
_cell_length_c                    12.0937(9) 
_cell_angle_alpha                 76.185(6) 
_cell_angle_beta                  89.248(6) 
_cell_angle_gamma                 67.319(6) 
_cell_volume                      1036.89(12) 
_cell_formula_units_Z             2 
_cell_measurement_temperature     293(2) 
_cell_measurement_reflns_used     ? 
_cell_measurement_theta_min       ? 
_cell_measurement_theta_max       ? 
 
_exptl_crystal_description        needl 
_exptl_crystal_colour             pink
_exptl_crystal_size_max           0.28 
_exptl_crystal_size_mid           0.24 
_exptl_crystal_size_min           0.24 
_exptl_crystal_density_meas       ? 
_exptl_crystal_density_diffrn     1.596 
_exptl_crystal_density_method     'not measured' 
_exptl_crystal_F_000              510 
_exptl_absorpt_coefficient_mu     0.874 
_exptl_absorpt_correction_type    multi-scan 
_exptl_absorpt_correction_T_min   0.7920 
_exptl_absorpt_correction_T_max   0.8177 
_exptl_absorpt_process_details    ? 
 
_exptl_special_details 
; 
 ? 
; 
 
_diffrn_ambient_temperature       293(2) 
_diffrn_radiation_wavelength      0.71073 
_diffrn_radiation_type            MoK\a 
_diffrn_radiation_source          'fine-focus sealed tube' 
_diffrn_radiation_monochromator   graphite 
_diffrn_measurement_device_type   'Bruker APEX-II CCD' 
_diffrn_measurement_method        '\f and \w scans' 
_diffrn_detector_area_resol_mean  ? 
_diffrn_reflns_number             8658 
_diffrn_reflns_av_R_equivalents   0.0301 
_diffrn_reflns_av_sigmaI/netI     0.0473 
_diffrn_reflns_limit_h_min        -10 
_diffrn_reflns_limit_h_max        11 
_diffrn_reflns_limit_k_min        -12 
_diffrn_reflns_limit_k_max        12 
_diffrn_reflns_limit_l_min        -14 
_diffrn_reflns_limit_l_max        14 
_diffrn_reflns_theta_min          2.46 
_diffrn_reflns_theta_max          25.49 
_reflns_number_total              3876 
_reflns_number_gt                 3157 
_reflns_threshold_expression      >2sigma(I) 
 
_computing_data_collection        'Bruker APEX2'
_computing_cell_refinement        'Bruker SAINT'
_computing_data_reduction         'Bruker SAINT' 
_computing_structure_solution     'SHELXS-97 (Sheldrick, 2008)' 
_computing_structure_refinement   'SHELXL-97 (Sheldrick, 2008)' 
_computing_molecular_graphics     'Bruker SHELXTL' 
_computing_publication_material   'Bruker SHELXTL' 
 
_refine_special_details 
; 
 Refinement of F^2^ against ALL reflections.  The weighted R-factor wR and 
 goodness of fit S are based on F^2^, conventional R-factors R are based 
 on F, with F set to zero for negative F^2^. The threshold expression of 
 F^2^ > 2sigma(F^2^) is used only for calculating R-factors(gt) etc. and is 
 not relevant to the choice of reflections for refinement.  R-factors based 
 on F^2^ are statistically about twice as large as those based on F, and R- 
 factors based on ALL data will be even larger. 
; 
 
_refine_ls_structure_factor_coef  Fsqd  
_refine_ls_matrix_type            full 
_refine_ls_weighting_scheme       calc  
_refine_ls_weighting_details 
 'calc w=1/[\s^2^(Fo^2^)+(0.0255P)^2^+0.3914P] where P=(Fo^2^+2Fc^2^)/3' 
_atom_sites_solution_primary      direct 
_atom_sites_solution_secondary    difmap 
_atom_sites_solution_hydrogens    geom 
_refine_ls_hydrogen_treatment     mixed 
_refine_ls_extinction_method      none 
_refine_ls_extinction_coef        ? 
_refine_ls_number_reflns          3876 
_refine_ls_number_parameters      315 
_refine_ls_number_restraints      2 
_refine_ls_R_factor_all           0.0500 
_refine_ls_R_factor_gt            0.0357 
_refine_ls_wR_factor_ref          0.0757 
_refine_ls_wR_factor_gt           0.0702 
_refine_ls_goodness_of_fit_ref    1.026 
_refine_ls_restrained_S_all       1.026 
_refine_ls_shift/su_max           0.001 
_refine_ls_shift/su_mean          0.000 
 
loop_ 
 _atom_site_label 
 _atom_site_type_symbol 
 _atom_site_fract_x 
 _atom_site_fract_y 
 _atom_site_fract_z 
 _atom_site_U_iso_or_equiv 
 _atom_site_adp_type 
 _atom_site_occupancy 
 _atom_site_symmetry_multiplicity 
 _atom_site_calc_flag 
 _atom_site_refinement_flags 
 _atom_site_disorder_assembly 
 _atom_site_disorder_group 
Co1 Co 0.22913(4) 0.57007(3) 0.27105(3) 0.02427(11) Uani 1 1 d . . . 
C5 C 0.2873(3) 0.3202(2) 0.16324(19) 0.0257(5) Uani 1 1 d . . . 
C4 C 0.3564(3) 0.1941(3) 0.1224(2) 0.0325(6) Uani 1 1 d . . . 
C1 C 0.5214(3) 0.3279(3) 0.2025(2) 0.0387(7) Uani 1 1 d . . . 
H1 H 0.5789 0.3709 0.2310 0.046 Uiso 1 1 calc R . . 
C6 C 0.2604(4) 0.1317(3) 0.0831(2) 0.0417(7) Uani 1 1 d . . . 
H6 H 0.3063 0.0440 0.0615 0.050 Uiso 1 1 calc R . . 
C2 C 0.5996(3) 0.2060(3) 0.1590(2) 0.0441(7) Uani 1 1 d . . . 
H2 H 0.7062 0.1715 0.1562 0.053 Uiso 1 1 calc R . . 
C9 C 0.1223(3) 0.3883(2) 0.15855(18) 0.0236(5) Uani 1 1 d . . . 
C3 C 0.5180(4) 0.1388(3) 0.1209(2) 0.0417(7) Uani 1 1 d . . . 
H3 H 0.5689 0.0561 0.0939 0.050 Uiso 1 1 calc R . . 
C8 C 0.0308(3) 0.3304(3) 0.11190(19) 0.0279(6) Uani 1 1 d . . . 
C7 C 0.1050(4) 0.1967(3) 0.0767(2) 0.0392(7) Uani 1 1 d . . . 
H7 H 0.0455 0.1548 0.0492 0.047 Uiso 1 1 calc R . . 
C10 C -0.1299(3) 0.4085(3) 0.1014(2) 0.0355(6) Uani 1 1 d . . . 
H10 H -0.1944 0.3753 0.0691 0.043 Uiso 1 1 calc R . . 
C12 C -0.0912(3) 0.5801(3) 0.1877(2) 0.0322(6) Uani 1 1 d . . . 
H12 H -0.1343 0.6641 0.2144 0.039 Uiso 1 1 calc R . . 
N2 N 0.0606(2) 0.5114(2) 0.19789(16) 0.0249(4) Uani 1 1 d . . . 
C24 C 0.1063(3) 0.0368(2) 0.64448(19) 0.0242(5) Uani 1 1 d . . . 
C19 C 0.2130(3) 0.0625(2) 0.5703(2) 0.0253(5) Uani 1 1 d . . . 
C21 C 0.2540(3) -0.1591(3) 0.5132(2) 0.0385(7) Uani 1 1 d . . . 
H21 H 0.3023 -0.2227 0.4679 0.046 Uiso 1 1 calc R . . 
C25 C 0.0183(3) 0.1382(3) 0.7179(2) 0.0272(6) Uani 1 1 d . . . 
O4 O 0.0319(2) 0.0833(2) 0.82305(15) 0.0479(5) Uani 1 1 d . . . 
C23 C 0.0769(3) -0.0890(2) 0.6521(2) 0.0304(6) Uani 1 1 d . . . 
H23 H 0.0074 -0.1080 0.7023 0.036 Uiso 1 1 calc R . . 
C20 C 0.2868(3) -0.0344(3) 0.5076(2) 0.0307(6) Uani 1 1 d . . . 
H20 H 0.3602 -0.0181 0.4603 0.037 Uiso 1 1 calc R . . 
C22 C 0.1495(3) -0.1858(3) 0.5864(2) 0.0353(6) Uani 1 1 d . . . 
H22 H 0.1277 -0.2685 0.5916 0.042 Uiso 1 1 calc R . . 
C17 C 0.2557(3) 0.1920(2) 0.5600(2) 0.0249(5) Uani 1 1 d . . . 
C14 C 0.3973(3) 0.3135(2) 0.62791(19) 0.0222(5) Uani 1 1 d . . . 
C16 C 0.3480(3) 0.1992(2) 0.64497(19) 0.0251(5) Uani 1 1 d . . . 
H16 H 0.3769 0.1270 0.7136 0.030 Uiso 1 1 calc R . . 
N3 N 0.2598(2) 0.4161(2) 0.44033(16) 0.0252(5) Uani 1 1 d . . . 
C18 C 0.2160(3) 0.3022(2) 0.4591(2) 0.0273(6) Uani 1 1 d . . . 
H18 H 0.1559 0.2970 0.4012 0.033 Uiso 1 1 calc R . . 
C13 C 0.3475(3) 0.4201(2) 0.52498(19) 0.0236(5) Uani 1 1 d . . . 
H13 H 0.3768 0.4992 0.5140 0.028 Uiso 1 1 calc R . . 
C11 C -0.1909(3) 0.5330(3) 0.1386(2) 0.0353(6) Uani 1 1 d . . . 
H11 H -0.2972 0.5861 0.1317 0.042 Uiso 1 1 calc R . . 
N1 N 0.3694(2) 0.3848(2) 0.20487(17) 0.0279(5) Uani 1 1 d . . . 
C15 C 0.5113(3) 0.3161(2) 0.7137(2) 0.0238(5) Uani 1 1 d . . . 
O2 O 0.5349(2) 0.23251(19) 0.81085(14) 0.0372(5) Uani 1 1 d . . . 
O1 O 0.5746(2) 0.40533(18) 0.67702(14) 0.0334(4) Uani 1 1 d . . . 
O3 O -0.0636(2) 0.26871(17) 0.66667(14) 0.0323(4) Uani 1 1 d . . . 
O5 O 0.2168(3) 0.7254(2) 0.10982(15) 0.0328(4) Uani 1 1 d D . . 
H1W H 0.135(3) 0.797(3) 0.118(3) 0.099(15) Uiso 1 1 d D . . 
H2W H 0.295(3) 0.742(3) 0.122(3) 0.064(11) Uiso 1 1 d D . . 
 
loop_ 
 _atom_site_aniso_label 
 _atom_site_aniso_U_11 
 _atom_site_aniso_U_22 
 _atom_site_aniso_U_33 
 _atom_site_aniso_U_23 
 _atom_site_aniso_U_13 
 _atom_site_aniso_U_12 
Co1 0.0266(2) 0.02579(18) 0.02540(18) -0.00834(13) -0.00015(14) -0.01451(16) 
C5 0.0304(16) 0.0235(12) 0.0223(12) -0.0053(10) 0.0011(11) -0.0099(12) 
C4 0.0382(18) 0.0255(13) 0.0268(13) -0.0075(10) 0.0010(12) -0.0046(13) 
C1 0.0248(17) 0.0418(16) 0.0435(17) -0.0064(13) -0.0040(13) -0.0091(14) 
C6 0.060(2) 0.0288(14) 0.0389(16) -0.0181(12) 0.0020(15) -0.0146(15) 
C2 0.0267(17) 0.0466(17) 0.0428(17) -0.0078(14) 0.0036(13) 0.0008(14) 
C9 0.0314(16) 0.0232(12) 0.0189(12) -0.0052(9) 0.0027(10) -0.0136(12) 
C3 0.045(2) 0.0331(15) 0.0339(15) -0.0109(12) 0.0042(13) 0.0001(14) 
C8 0.0372(17) 0.0306(13) 0.0231(13) -0.0060(10) 0.0008(11) -0.0214(13) 
C7 0.056(2) 0.0351(15) 0.0367(16) -0.0137(12) 0.0004(14) -0.0257(16) 
C10 0.0377(18) 0.0487(16) 0.0320(15) -0.0099(12) 0.0023(12) -0.0298(15) 
C12 0.0272(16) 0.0357(14) 0.0354(15) -0.0143(12) 0.0056(12) -0.0114(13) 
N2 0.0236(13) 0.0254(10) 0.0273(11) -0.0092(8) 0.0022(9) -0.0099(10) 
C24 0.0260(15) 0.0212(12) 0.0266(13) -0.0056(10) -0.0015(11) -0.0107(11) 
C19 0.0229(15) 0.0265(12) 0.0295(13) -0.0048(10) -0.0022(11) -0.0144(12) 
C21 0.0382(18) 0.0329(14) 0.0510(18) -0.0235(13) 0.0052(14) -0.0136(14) 
C25 0.0287(16) 0.0308(14) 0.0293(14) -0.0093(11) 0.0035(11) -0.0185(13) 
O4 0.0559(15) 0.0431(11) 0.0302(11) -0.0065(9) 0.0066(9) -0.0057(11) 
C23 0.0322(16) 0.0285(13) 0.0350(14) -0.0058(11) 0.0030(12) -0.0181(13) 
C20 0.0263(16) 0.0306(13) 0.0377(15) -0.0092(11) 0.0099(12) -0.0135(12) 
C22 0.0395(18) 0.0234(13) 0.0488(17) -0.0102(12) 0.0009(13) -0.0177(13) 
C17 0.0241(15) 0.0257(12) 0.0308(13) -0.0106(10) 0.0074(11) -0.0142(11) 
C14 0.0218(14) 0.0246(12) 0.0247(12) -0.0102(10) 0.0066(10) -0.0117(11) 
C16 0.0265(15) 0.0259(12) 0.0246(13) -0.0044(10) 0.0026(11) -0.0132(12) 
N3 0.0255(13) 0.0248(10) 0.0284(11) -0.0047(8) -0.0009(9) -0.0142(10) 
C18 0.0265(15) 0.0302(13) 0.0314(14) -0.0081(11) -0.0001(11) -0.0175(12) 
C13 0.0251(15) 0.0228(12) 0.0287(13) -0.0084(10) 0.0051(11) -0.0146(11) 
C11 0.0220(16) 0.0499(16) 0.0361(15) -0.0115(13) 0.0040(12) -0.0162(14) 
N1 0.0234(13) 0.0302(11) 0.0301(11) -0.0080(9) -0.0018(9) -0.0103(10) 
C15 0.0237(15) 0.0260(12) 0.0260(13) -0.0095(10) 0.0049(10) -0.0129(12) 
O2 0.0416(13) 0.0443(11) 0.0295(10) 0.0023(8) -0.0052(8) -0.0275(10) 
O1 0.0396(12) 0.0408(10) 0.0298(9) -0.0026(8) -0.0035(8) -0.0300(10) 
O3 0.0426(12) 0.0238(9) 0.0305(10) -0.0084(7) 0.0063(8) -0.0123(9) 
O5 0.0334(13) 0.0391(11) 0.0297(10) -0.0091(8) 0.0009(9) -0.0179(11) 
 
_geom_special_details 
; 
 All esds (except the esd in the dihedral angle between two l.s. planes) 
 are estimated using the full covariance matrix.  The cell esds are taken 
 into account individually in the estimation of esds in distances, angles 
 and torsion angles; correlations between esds in cell parameters are only 
 used when they are defined by crystal symmetry.  An approximate (isotropic) 
 treatment of cell esds is used for estimating esds involving l.s. planes. 
; 
 
loop_ 
 _geom_bond_atom_site_label_1 
 _geom_bond_atom_site_label_2 
 _geom_bond_distance 
 _geom_bond_site_symmetry_2 
 _geom_bond_publ_flag 
Co1 O3 2.0700(17) 2_566 ? 
Co1 O1 2.0826(16) 2_666 ? 
Co1 N2 2.1636(19) . ? 
Co1 O5 2.1712(18) . ? 
Co1 N1 2.174(2) . ? 
Co1 N3 2.2073(19) . ? 
C5 N1 1.360(3) . ? 
C5 C4 1.404(3) . ? 
C5 C9 1.432(3) . ? 
C4 C3 1.406(4) . ? 
C4 C6 1.431(4) . ? 
C1 N1 1.324(3) . ? 
C1 C2 1.401(4) . ? 
C1 H1 0.9300 . ? 
C6 C7 1.348(4) . ? 
C6 H6 0.9300 . ? 
C2 C3 1.356(4) . ? 
C2 H2 0.9300 . ? 
C9 N2 1.363(3) . ? 
C9 C8 1.405(3) . ? 
C3 H3 0.9300 . ? 
C8 C10 1.403(4) . ? 
C8 C7 1.437(3) . ? 
C7 H7 0.9300 . ? 
C10 C11 1.360(3) . ? 
C10 H10 0.9300 . ? 
C12 N2 1.320(3) . ? 
C12 C11 1.400(3) . ? 
C12 H12 0.9300 . ? 
C24 C19 1.396(3) . ? 
C24 C23 1.396(3) . ? 
C24 C25 1.517(3) . ? 
C19 C20 1.360(3) . ? 
C19 C17 1.501(3) . ? 
C21 C22 1.377(4) . ? 
C21 C20 1.407(3) . ? 
C21 H21 0.9300 . ? 
C25 O4 1.248(3) . ? 
C25 O3 1.256(3) . ? 
C23 C22 1.384(3) . ? 
C23 H23 0.9300 . ? 
C20 H20 0.9300 . ? 
C22 H22 0.9300 . ? 
C17 C18 1.387(3) . ? 
C17 C16 1.388(3) . ? 
C14 C16 1.384(3) . ? 
C14 C13 1.388(3) . ? 
C14 C15 1.515(3) . ? 
C16 H16 0.9300 . ? 
N3 C13 1.342(3) . ? 
N3 C18 1.346(3) . ? 
C18 H18 0.9300 . ? 
C13 H13 0.9300 . ? 
C11 H11 0.9300 . ? 
C15 O2 1.240(3) . ? 
C15 O1 1.265(3) . ? 
O1 Co1 2.0826(16) 2_666 ? 
O3 Co1 2.0701(17) 2_566 ? 
O5 H1W 0.860(19) . ? 
O5 H2W 0.839(18) . ? 
 
loop_ 
 _geom_angle_atom_site_label_1 
 _geom_angle_atom_site_label_2 
 _geom_angle_atom_site_label_3 
 _geom_angle 
 _geom_angle_site_symmetry_1 
 _geom_angle_site_symmetry_3 
 _geom_angle_publ_flag 
O3 Co1 O1 99.03(7) 2_566 2_666 ? 
O3 Co1 N2 93.54(7) 2_566 . ? 
O1 Co1 N2 167.33(7) 2_666 . ? 
O3 Co1 O5 91.92(7) 2_566 . ? 
O1 Co1 O5 88.11(7) 2_666 . ? 
N2 Co1 O5 89.94(7) . . ? 
O3 Co1 N1 169.23(7) 2_566 . ? 
O1 Co1 N1 91.18(7) 2_666 . ? 
N2 Co1 N1 76.37(7) . . ? 
O5 Co1 N1 91.82(7) . . ? 
O3 Co1 N3 88.52(7) 2_566 . ? 
O1 Co1 N3 86.60(7) 2_666 . ? 
N2 Co1 N3 95.30(7) . . ? 
O5 Co1 N3 174.70(7) . . ? 
N1 Co1 N3 88.70(7) . . ? 
N1 C5 C4 123.2(2) . . ? 
N1 C5 C9 117.4(2) . . ? 
C4 C5 C9 119.4(2) . . ? 
C5 C4 C3 116.8(2) . . ? 
C5 C4 C6 119.1(2) . . ? 
C3 C4 C6 124.1(2) . . ? 
N1 C1 C2 123.1(3) . . ? 
N1 C1 H1 118.5 . . ? 
C2 C1 H1 118.5 . . ? 
C7 C6 C4 121.6(2) . . ? 
C7 C6 H6 119.2 . . ? 
C4 C6 H6 119.2 . . ? 
C3 C2 C1 119.2(3) . . ? 
C3 C2 H2 120.4 . . ? 
C1 C2 H2 120.4 . . ? 
N2 C9 C8 122.7(2) . . ? 
N2 C9 C5 117.2(2) . . ? 
C8 C9 C5 120.1(2) . . ? 
C2 C3 C4 120.1(2) . . ? 
C2 C3 H3 120.0 . . ? 
C4 C3 H3 120.0 . . ? 
C10 C8 C9 117.4(2) . . ? 
C10 C8 C7 123.5(2) . . ? 
C9 C8 C7 119.1(2) . . ? 
C6 C7 C8 120.4(2) . . ? 
C6 C7 H7 119.8 . . ? 
C8 C7 H7 119.8 . . ? 
C11 C10 C8 119.7(2) . . ? 
C11 C10 H10 120.1 . . ? 
C8 C10 H10 120.1 . . ? 
N2 C12 C11 123.4(2) . . ? 
N2 C12 H12 118.3 . . ? 
C11 C12 H12 118.3 . . ? 
C12 N2 C9 117.7(2) . . ? 
C12 N2 Co1 127.80(15) . . ? 
C9 N2 Co1 114.50(16) . . ? 
C19 C24 C23 118.7(2) . . ? 
C19 C24 C25 124.09(19) . . ? 
C23 C24 C25 117.2(2) . . ? 
C20 C19 C24 120.2(2) . . ? 
C20 C19 C17 117.6(2) . . ? 
C24 C19 C17 122.2(2) . . ? 
C22 C21 C20 119.3(2) . . ? 
C22 C21 H21 120.3 . . ? 
C20 C21 H21 120.3 . . ? 
O4 C25 O3 126.2(2) . . ? 
O4 C25 C24 116.9(2) . . ? 
O3 C25 C24 116.8(2) . . ? 
C22 C23 C24 121.1(2) . . ? 
C22 C23 H23 119.5 . . ? 
C24 C23 H23 119.5 . . ? 
C19 C20 C21 121.0(2) . . ? 
C19 C20 H20 119.5 . . ? 
C21 C20 H20 119.5 . . ? 
C21 C22 C23 119.6(2) . . ? 
C21 C22 H22 120.2 . . ? 
C23 C22 H22 120.2 . . ? 
C18 C17 C16 117.7(2) . . ? 
C18 C17 C19 120.2(2) . . ? 
C16 C17 C19 121.8(2) . . ? 
C16 C14 C13 117.4(2) . . ? 
C16 C14 C15 121.4(2) . . ? 
C13 C14 C15 121.01(19) . . ? 
C17 C16 C14 120.2(2) . . ? 
C17 C16 H16 119.9 . . ? 
C14 C16 H16 119.9 . . ? 
C13 N3 C18 116.9(2) . . ? 
C13 N3 Co1 119.01(14) . . ? 
C18 N3 Co1 123.22(15) . . ? 
N3 C18 C17 123.6(2) . . ? 
N3 C18 H18 118.2 . . ? 
C17 C18 H18 118.2 . . ? 
N3 C13 C14 124.10(19) . . ? 
N3 C13 H13 117.9 . . ? 
C14 C13 H13 117.9 . . ? 
C10 C11 C12 119.0(2) . . ? 
C10 C11 H11 120.5 . . ? 
C12 C11 H11 120.5 . . ? 
C1 N1 C5 117.7(2) . . ? 
C1 N1 Co1 128.23(17) . . ? 
C5 N1 Co1 114.10(16) . . ? 
O2 C15 O1 126.3(2) . . ? 
O2 C15 C14 118.63(19) . . ? 
O1 C15 C14 115.0(2) . . ? 
C15 O1 Co1 134.99(16) . 2_666 ? 
C25 O3 Co1 129.03(16) . 2_566 ? 
Co1 O5 H1W 99(3) . . ? 
Co1 O5 H2W 99(2) . . ? 
H1W O5 H2W 110(3) . . ? 
 
loop_ 
 _geom_hbond_atom_site_label_D 
 _geom_hbond_atom_site_label_H 
 _geom_hbond_atom_site_label_A 
 _geom_hbond_distance_DH 
 _geom_hbond_distance_HA 
 _geom_hbond_distance_DA 
 _geom_hbond_angle_DHA 
 _geom_hbond_site_symmetry_A 
O5 H1W O4  0.860(19) 1.84(2) 2.672(3) 163(4) 2_566 
O5 H2W O2  0.839(18) 1.937(19) 2.757(3) 166(3) 2_666 
O5 H2W O1  0.839(18) 2.57(3) 2.959(3) 110(2) 2_666 
 
_diffrn_measured_fraction_theta_max    0.999 
_diffrn_reflns_theta_full              25.49 
_diffrn_measured_fraction_theta_full   0.999 
_refine_diff_density_max    0.314 
_refine_diff_density_min   -0.275 
_refine_diff_density_rms    0.055 

#===END
 
data_p-1 (Compound 7)
 
_audit_creation_method            SHELXL-97 
_chemical_name_systematic 
; 
 ? 
; 
_chemical_name_common             ? 
_chemical_melting_point           ? 
_chemical_formula_moiety          ? 
_chemical_formula_sum 
 'C25 H17 Mn N3 O5' 
_chemical_formula_weight          494.36 
 
loop_ 
 _atom_type_symbol 
 _atom_type_description 
 _atom_type_scat_dispersion_real 
 _atom_type_scat_dispersion_imag 
 _atom_type_scat_source 
 'C'  'C'   0.0033   0.0016 
 'International Tables Vol C Tables 4.2.6.8 and 6.1.1.4' 
 'H'  'H'   0.0000   0.0000 
 'International Tables Vol C Tables 4.2.6.8 and 6.1.1.4' 
 'N'  'N'   0.0061   0.0033 
 'International Tables Vol C Tables 4.2.6.8 and 6.1.1.4' 
 'O'  'O'   0.0106   0.0060 
 'International Tables Vol C Tables 4.2.6.8 and 6.1.1.4' 
 'Mn'  'Mn'   0.3368   0.7283 
 'International Tables Vol C Tables 4.2.6.8 and 6.1.1.4' 
 
_symmetry_cell_setting            Triclinic 
_symmetry_space_group_name_H-M    p-1
 
loop_ 
 _symmetry_equiv_pos_as_xyz 
 'x, y, z' 
 '-x, -y, -z' 
 
_cell_length_a                    9.397(4) 
_cell_length_b                    10.234(4) 
_cell_length_c                    12.236(5) 
_cell_angle_alpha                 76.491(4) 
_cell_angle_beta                  89.120(4) 
_cell_angle_gamma                 67.549(4) 
_cell_volume                      1053.8(8) 
_cell_formula_units_Z             2 
_cell_measurement_temperature     296(2) 
_cell_measurement_reflns_used     ? 
_cell_measurement_theta_min       ? 
_cell_measurement_theta_max       ? 
 
_exptl_crystal_description        block
_exptl_crystal_colour             yellow 
_exptl_crystal_size_max           0.28 
_exptl_crystal_size_mid           0.24 
_exptl_crystal_size_min           0.22 
_exptl_crystal_density_meas       ? 
_exptl_crystal_density_diffrn     1.558 
_exptl_crystal_density_method     'not measured' 
_exptl_crystal_F_000              506 
_exptl_absorpt_coefficient_mu     0.672 
_exptl_absorpt_correction_type    multi-scan 
_exptl_absorpt_correction_T_min   0.8342 
_exptl_absorpt_correction_T_max   0.8663 
_exptl_absorpt_process_details    SADABS 
 
_exptl_special_details 
; 
 ? 
; 
 
_diffrn_ambient_temperature       296(2) 
_diffrn_radiation_wavelength      0.71073 
_diffrn_radiation_type            MoK\a 
_diffrn_radiation_source          'fine-focus sealed tube' 
_diffrn_radiation_monochromator   graphite 
_diffrn_measurement_device_type   'Bruker APEX-II CCD' 
_diffrn_measurement_method        '\f and \w scans' 
_diffrn_detector_area_resol_mean  ? 
_diffrn_reflns_number             7355 
_diffrn_reflns_av_R_equivalents   0.0676 
_diffrn_reflns_av_sigmaI/netI     0.1358 
_diffrn_reflns_limit_h_min        -11 
_diffrn_reflns_limit_h_max        11 
_diffrn_reflns_limit_k_min        -12 
_diffrn_reflns_limit_k_max        11 
_diffrn_reflns_limit_l_min        -14 
_diffrn_reflns_limit_l_max        14 
_diffrn_reflns_theta_min          2.22 
_diffrn_reflns_theta_max          25.50 
_reflns_number_total              3859 
_reflns_number_gt                 2332 
_reflns_threshold_expression      >2sigma(I) 
 
_computing_data_collection        'Bruker APEX2'  
_computing_cell_refinement        'Bruker SAINT' 
_computing_data_reduction         'Bruker SAINT' 
_computing_structure_solution     'SHELXS-97 (Sheldrick, 2008)' 
_computing_structure_refinement   'SHELXL-97 (Sheldrick, 2008)' 
_computing_molecular_graphics     'Bruker SHELXTL'  
_computing_publication_material   'Bruker SHELXTL'  
 
_refine_special_details 
; 
 Refinement of F^2^ against ALL reflections.  The weighted R-factor wR and 
 goodness of fit S are based on F^2^, conventional R-factors R are based 
 on F, with F set to zero for negative F^2^. The threshold expression of 
 F^2^ > 2sigma(F^2^) is used only for calculating R-factors(gt) etc. and is 
 not relevant to the choice of reflections for refinement.  R-factors based 
 on F^2^ are statistically about twice as large as those based on F, and R- 
 factors based on ALL data will be even larger. 
; 
 
_refine_ls_structure_factor_coef  Fsqd  
_refine_ls_matrix_type            full 
_refine_ls_weighting_scheme       calc  
_refine_ls_weighting_details 
 'calc w=1/[\s^2^(Fo^2^)+(0.0067P)^2^+0.0000P] where P=(Fo^2^+2Fc^2^)/3' 
_atom_sites_solution_primary      direct 
_atom_sites_solution_secondary    difmap 
_atom_sites_solution_hydrogens    geom 
_refine_ls_hydrogen_treatment     constr 
_refine_ls_extinction_method      none 
_refine_ls_extinction_coef        ? 
_refine_ls_number_reflns          3859 
_refine_ls_number_parameters      308 
_refine_ls_number_restraints      0 
_refine_ls_R_factor_all           0.1198 
_refine_ls_R_factor_gt            0.0665 
_refine_ls_wR_factor_ref          0.1477 
_refine_ls_wR_factor_gt           0.1234 
_refine_ls_goodness_of_fit_ref    1.032 
_refine_ls_restrained_S_all       1.032 
_refine_ls_shift/su_max           0.000 
_refine_ls_shift/su_mean          0.000 
 
loop_ 
 _atom_site_label 
 _atom_site_type_symbol 
 _atom_site_fract_x 
 _atom_site_fract_y 
 _atom_site_fract_z 
 _atom_site_U_iso_or_equiv 
 _atom_site_adp_type 
 _atom_site_occupancy 
 _atom_site_symmetry_multiplicity 
 _atom_site_calc_flag 
 _atom_site_refinement_flags 
 _atom_site_disorder_assembly 
 _atom_site_disorder_group 
Mn1 Mn 0.72539(8) 0.57603(8) 0.76896(6) 0.0318(2) Uani 1 1 d . . . 
O5 O 0.7187(4) 0.7397(4) 0.6107(3) 0.0425(9) Uani 1 1 d . . . 
H1W H 0.7958 0.7588 0.6119 0.064 Uiso 1 1 d R . . 
H2W H 0.6403 0.8095 0.6242 0.055(18) Uiso 1 1 d R . . 
N3 N 0.7581(4) 0.4144(4) 0.9422(3) 0.0329(10) Uani 1 1 d . . . 
C8 C 0.8487(6) 0.1876(5) 0.6204(4) 0.0367(13) Uani 1 1 d . . . 
N1 N 0.5530(4) 0.5079(4) 0.6914(3) 0.0305(9) Uani 1 1 d . . . 
C9 C 0.7791(5) 0.3153(5) 0.6581(4) 0.0316(12) Uani 1 1 d . . . 
C10 C 1.0097(6) 0.1294(6) 0.6201(4) 0.0478(15) Uani 1 1 d . . . 
H10 H 1.0595 0.0457 0.5946 0.057 Uiso 1 1 calc R . . 
C2 C 0.3023(6) 0.5283(6) 0.6325(4) 0.0425(14) Uani 1 1 d . . . 
H2 H 0.1961 0.5816 0.6246 0.051 Uiso 1 1 calc R . . 
C5 C 0.6147(5) 0.3847(5) 0.6532(4) 0.0307(11) Uani 1 1 d . . . 
C12 C 1.0164(6) 0.3189(6) 0.6986(4) 0.0437(14) Uani 1 1 d . . . 
H12 H 1.0751 0.3607 0.7270 0.052 Uiso 1 1 calc R . . 
N2 N 0.8647(4) 0.3777(4) 0.6987(3) 0.0348(10) Uani 1 1 d . . . 
C4 C 0.5234(6) 0.3269(5) 0.6063(4) 0.0352(12) Uani 1 1 d . . . 
C3 C 0.3627(6) 0.4044(6) 0.5971(4) 0.0429(14) Uani 1 1 d . . . 
H3 H 0.2978 0.3703 0.5665 0.051 Uiso 1 1 calc R . . 
C1 C 0.4017(6) 0.5758(5) 0.6817(4) 0.0383(13) Uani 1 1 d . . . 
H1 H 0.3586 0.6592 0.7087 0.046 Uiso 1 1 calc R . . 
C11 C 1.0920(6) 0.1955(6) 0.6570(5) 0.0513(15) Uani 1 1 d . . . 
H11 H 1.1988 0.1593 0.6549 0.062 Uiso 1 1 calc R . . 
C17 C 0.7563(5) 0.1899(5) 1.0576(4) 0.0315(11) Uani 1 1 d . . . 
C7 C 0.7506(7) 0.1277(6) 0.5803(4) 0.0462(14) Uani 1 1 d . . . 
H7 H 0.7953 0.0401 0.5590 0.055 Uiso 1 1 calc R . . 
C6 C 0.5957(7) 0.1945(5) 0.5726(4) 0.0452(14) Uani 1 1 d . . . 
H6 H 0.5353 0.1535 0.5450 0.054 Uiso 1 1 calc R . . 
C13 C 0.8461(5) 0.4184(5) 1.0264(4) 0.0317(12) Uani 1 1 d . . . 
H13 H 0.8767 0.4964 1.0161 0.038 Uiso 1 1 calc R . . 
C18 C 0.7165(5) 0.3004(5) 0.9594(4) 0.0355(12) Uani 1 1 d . . . 
H18 H 0.6572 0.2949 0.9017 0.043 Uiso 1 1 calc R . . 
C14 C 0.8933(5) 0.3128(5) 1.1270(4) 0.0273(11) Uani 1 1 d . . . 
C15 C 1.0044(5) 0.3166(5) 1.2130(4) 0.0325(12) Uani 1 1 d . . . 
C16 C 0.8454(5) 0.1989(5) 1.1419(4) 0.0315(12) Uani 1 1 d . . . 
H16 H 0.8734 0.1273 1.2094 0.038 Uiso 1 1 calc R . . 
C19 C 0.7143(5) 0.0611(5) 1.0665(4) 0.0327(12) Uani 1 1 d . . . 
C20 C 0.7863(5) -0.0322(5) 1.0035(4) 0.0348(12) Uani 1 1 d . . . 
H20 H 0.8587 -0.0145 0.9561 0.042 Uiso 1 1 calc R . . 
C21 C 0.7537(6) -0.1564(6) 1.0082(5) 0.0510(15) Uani 1 1 d . . . 
H21 H 0.7988 -0.2167 0.9603 0.061 Uiso 1 1 calc R . . 
C22 C 0.6552(6) -0.1887(6) 1.0838(5) 0.0466(14) Uani 1 1 d . . . 
H22 H 0.6356 -0.2724 1.0894 0.056 Uiso 1 1 calc R . . 
C23 C 0.5858(6) -0.0950(5) 1.1511(4) 0.0395(13) Uani 1 1 d . . . 
H23 H 0.5190 -0.1163 1.2025 0.047 Uiso 1 1 calc R . . 
C24 C 0.6133(5) 0.0301(5) 1.1440(4) 0.0307(11) Uani 1 1 d . . . 
C25 C 0.5266(5) 0.1293(6) 1.2187(4) 0.0338(12) Uani 1 1 d . . . 
O1 O 1.0669(4) 0.4074(4) 1.1803(3) 0.0404(9) Uani 1 1 d . . . 
O2 O 1.0282(4) 0.2309(4) 1.3067(3) 0.0430(9) Uani 1 1 d . . . 
O3 O 0.4537(4) 0.2611(4) 1.1716(3) 0.0416(9) Uani 1 1 d . . . 
O4 O 0.5335(4) 0.0720(4) 1.3202(3) 0.0555(11) Uani 1 1 d . . . 
 
loop_ 
 _atom_site_aniso_label 
 _atom_site_aniso_U_11 
 _atom_site_aniso_U_22 
 _atom_site_aniso_U_33 
 _atom_site_aniso_U_23 
 _atom_site_aniso_U_13 
 _atom_site_aniso_U_12 
Mn1 0.0361(5) 0.0320(5) 0.0328(4) -0.0106(3) -0.0012(3) -0.0176(4) 
O5 0.042(2) 0.047(2) 0.043(2) -0.0136(19) -0.0026(17) -0.020(2) 
N3 0.039(2) 0.031(2) 0.035(2) -0.006(2) -0.001(2) -0.021(2) 
C8 0.046(3) 0.028(3) 0.029(3) -0.007(2) -0.002(2) -0.006(2) 
N1 0.033(2) 0.032(2) 0.029(2) -0.0134(19) 0.0047(18) -0.0120(19) 
C9 0.031(3) 0.031(3) 0.029(3) -0.002(2) -0.003(2) -0.011(2) 
C10 0.042(3) 0.043(4) 0.045(3) -0.013(3) 0.004(3) -0.001(3) 
C2 0.029(3) 0.059(4) 0.039(3) -0.015(3) 0.005(2) -0.016(3) 
C5 0.037(3) 0.024(3) 0.028(3) -0.005(2) -0.001(2) -0.010(2) 
C12 0.033(3) 0.050(4) 0.048(3) -0.009(3) 0.000(3) -0.018(3) 
N2 0.026(2) 0.035(2) 0.042(3) -0.009(2) -0.0054(19) -0.011(2) 
C4 0.049(3) 0.038(3) 0.028(3) -0.006(2) -0.001(2) -0.028(3) 
C3 0.041(3) 0.061(4) 0.035(3) -0.005(3) 0.001(3) -0.033(3) 
C1 0.034(3) 0.042(3) 0.042(3) -0.018(3) 0.004(2) -0.014(3) 
C11 0.033(3) 0.058(4) 0.050(4) -0.011(3) 0.003(3) -0.006(3) 
C17 0.031(3) 0.032(3) 0.036(3) -0.012(2) 0.003(2) -0.016(2) 
C7 0.067(4) 0.033(3) 0.043(3) -0.016(3) 0.007(3) -0.020(3) 
C6 0.068(4) 0.036(3) 0.040(3) -0.015(3) -0.002(3) -0.026(3) 
C13 0.032(3) 0.030(3) 0.039(3) -0.014(2) 0.004(2) -0.016(2) 
C18 0.038(3) 0.034(3) 0.038(3) -0.005(3) -0.006(2) -0.020(2) 
C14 0.024(2) 0.032(3) 0.030(3) -0.010(2) 0.006(2) -0.014(2) 
C15 0.031(3) 0.035(3) 0.034(3) -0.012(3) 0.004(2) -0.012(2) 
C16 0.035(3) 0.031(3) 0.032(3) -0.006(2) 0.005(2) -0.018(2) 
C19 0.033(3) 0.031(3) 0.039(3) -0.002(2) -0.005(2) -0.021(2) 
C20 0.032(3) 0.031(3) 0.047(3) -0.014(3) 0.014(2) -0.016(2) 
C21 0.045(3) 0.056(4) 0.062(4) -0.033(3) 0.006(3) -0.021(3) 
C22 0.055(4) 0.032(3) 0.060(4) -0.015(3) 0.004(3) -0.022(3) 
C23 0.044(3) 0.043(3) 0.043(3) -0.012(3) 0.005(3) -0.027(3) 
C24 0.034(3) 0.030(3) 0.029(3) -0.009(2) -0.002(2) -0.013(2) 
C25 0.035(3) 0.034(3) 0.040(3) -0.014(3) 0.006(3) -0.019(3) 
O1 0.051(2) 0.046(2) 0.037(2) -0.0052(18) -0.0049(17) -0.0351(19) 
O2 0.049(2) 0.050(2) 0.036(2) 0.0003(19) -0.0066(17) -0.0308(19) 
O3 0.052(2) 0.033(2) 0.042(2) -0.0116(18) 0.0105(18) -0.0168(18) 
O4 0.065(3) 0.054(3) 0.036(2) -0.006(2) 0.008(2) -0.013(2) 
 
_geom_special_details 
; 
 All esds (except the esd in the dihedral angle between two l.s. planes) 
 are estimated using the full covariance matrix.  The cell esds are taken 
 into account individually in the estimation of esds in distances, angles 
 and torsion angles; correlations between esds in cell parameters are only 
 used when they are defined by crystal symmetry.  An approximate (isotropic) 
 treatment of cell esds is used for estimating esds involving l.s. planes. 
; 
 
loop_ 
 _geom_bond_atom_site_label_1 
 _geom_bond_atom_site_label_2 
 _geom_bond_distance 
 _geom_bond_site_symmetry_2 
 _geom_bond_publ_flag 
Mn1 O3 2.127(3) 2_667 ? 
Mn1 O1 2.137(3) 2_767 ? 
Mn1 O5 2.229(3) . ? 
Mn1 N1 2.287(4) . ? 
Mn1 N3 2.306(4) . ? 
Mn1 N2 2.308(4) . ? 
N3 C18 1.338(5) . ? 
N3 C13 1.348(5) . ? 
C8 C10 1.399(7) . ? 
C8 C9 1.402(6) . ? 
C8 C7 1.432(7) . ? 
N1 C1 1.315(6) . ? 
N1 C5 1.361(5) . ? 
C9 N2 1.362(6) . ? 
C9 C5 1.428(6) . ? 
C10 C11 1.346(7) . ? 
C2 C3 1.348(7) . ? 
C2 C1 1.405(6) . ? 
C5 C4 1.406(6) . ? 
C12 N2 1.319(6) . ? 
C12 C11 1.400(7) . ? 
C4 C3 1.404(7) . ? 
C4 C6 1.420(6) . ? 
C17 C16 1.380(6) . ? 
C17 C18 1.385(6) . ? 
C17 C19 1.494(6) . ? 
C7 C6 1.345(7) . ? 
C13 C14 1.382(6) . ? 
C14 C16 1.376(6) . ? 
C14 C15 1.511(6) . ? 
C15 O2 1.234(5) . ? 
C15 O1 1.266(5) . ? 
C19 C20 1.341(6) . ? 
C19 C24 1.400(6) . ? 
C20 C21 1.405(7) . ? 
C21 C22 1.373(7) . ? 
C22 C23 1.378(6) . ? 
C23 C24 1.384(6) . ? 
C24 C25 1.520(6) . ? 
C25 O4 1.235(5) . ? 
C25 O3 1.251(5) . ? 
O1 Mn1 2.137(3) 2_767 ? 
O3 Mn1 2.128(3) 2_667 ? 
 
loop_ 
 _geom_angle_atom_site_label_1 
 _geom_angle_atom_site_label_2 
 _geom_angle_atom_site_label_3 
 _geom_angle 
 _geom_angle_site_symmetry_1 
 _geom_angle_site_symmetry_3 
 _geom_angle_publ_flag 
O3 Mn1 O1 104.52(13) 2_667 2_767 ? 
O3 Mn1 O5 90.58(13) 2_667 . ? 
O1 Mn1 O5 86.26(12) 2_767 . ? 
O3 Mn1 N1 92.25(13) 2_667 . ? 
O1 Mn1 N1 163.21(13) 2_767 . ? 
O5 Mn1 N1 92.85(13) . . ? 
O3 Mn1 N3 89.76(13) 2_667 . ? 
O1 Mn1 N3 86.12(13) 2_767 . ? 
O5 Mn1 N3 172.21(13) . . ? 
N1 Mn1 N3 94.91(14) . . ? 
O3 Mn1 N2 163.91(14) 2_667 . ? 
O1 Mn1 N2 91.10(14) 2_767 . ? 
O5 Mn1 N2 94.32(14) . . ? 
N1 Mn1 N2 72.23(13) . . ? 
N3 Mn1 N2 87.46(14) . . ? 
C18 N3 C13 116.7(4) . . ? 
C18 N3 Mn1 123.3(3) . . ? 
C13 N3 Mn1 119.0(3) . . ? 
C10 C8 C9 117.9(5) . . ? 
C10 C8 C7 123.8(5) . . ? 
C9 C8 C7 118.2(5) . . ? 
C1 N1 C5 117.9(4) . . ? 
C1 N1 Mn1 126.0(3) . . ? 
C5 N1 Mn1 116.1(3) . . ? 
N2 C9 C8 121.6(4) . . ? 
N2 C9 C5 118.1(4) . . ? 
C8 C9 C5 120.3(5) . . ? 
C11 C10 C8 119.5(5) . . ? 
C3 C2 C1 119.2(5) . . ? 
N1 C5 C4 122.7(4) . . ? 
N1 C5 C9 118.0(4) . . ? 
C4 C5 C9 119.3(4) . . ? 
N2 C12 C11 122.2(5) . . ? 
C12 N2 C9 118.8(4) . . ? 
C12 N2 Mn1 125.9(3) . . ? 
C9 N2 Mn1 115.2(3) . . ? 
C3 C4 C5 117.0(5) . . ? 
C3 C4 C6 123.5(5) . . ? 
C5 C4 C6 119.5(5) . . ? 
C2 C3 C4 120.1(5) . . ? 
N1 C1 C2 123.1(5) . . ? 
C10 C11 C12 119.8(5) . . ? 
C16 C17 C18 117.2(4) . . ? 
C16 C17 C19 122.1(4) . . ? 
C18 C17 C19 120.5(4) . . ? 
C6 C7 C8 121.8(5) . . ? 
C7 C6 C4 120.6(5) . . ? 
N3 C13 C14 123.6(4) . . ? 
N3 C18 C17 124.1(5) . . ? 
C16 C14 C13 117.7(4) . . ? 
C16 C14 C15 121.4(4) . . ? 
C13 C14 C15 120.7(4) . . ? 
O2 C15 O1 126.1(5) . . ? 
O2 C15 C14 118.0(4) . . ? 
O1 C15 C14 115.9(4) . . ? 
C14 C16 C17 120.6(5) . . ? 
C20 C19 C24 120.0(4) . . ? 
C20 C19 C17 117.7(4) . . ? 
C24 C19 C17 122.2(4) . . ? 
C19 C20 C21 120.8(5) . . ? 
C22 C21 C20 119.9(5) . . ? 
C21 C22 C23 118.9(5) . . ? 
C22 C23 C24 121.4(5) . . ? 
C23 C24 C19 118.9(4) . . ? 
C23 C24 C25 117.4(4) . . ? 
C19 C24 C25 123.7(4) . . ? 
O4 C25 O3 126.0(5) . . ? 
O4 C25 C24 116.9(4) . . ? 
O3 C25 C24 117.1(4) . . ? 
C15 O1 Mn1 134.6(3) . 2_767 ? 
C25 O3 Mn1 129.5(3) . 2_667 ? 
 
loop_ 
 _geom_hbond_atom_site_label_D 
 _geom_hbond_atom_site_label_H 
 _geom_hbond_atom_site_label_A 
 _geom_hbond_distance_DH 
 _geom_hbond_distance_HA 
 _geom_hbond_distance_DA 
 _geom_hbond_angle_DHA 
 _geom_hbond_site_symmetry_A 
O5 H2W O4  0.85 1.85 2.694(5) 167.0 2_667 
O5 H1W O2  0.82 1.99 2.745(4) 152.0 2_767 
 
_diffrn_measured_fraction_theta_max    0.982 
_diffrn_reflns_theta_full              25.50 
_diffrn_measured_fraction_theta_full   0.982 
_refine_diff_density_max    0.352 
_refine_diff_density_min   -0.398 
_refine_diff_density_rms    0.084 

#===END
 
data_pca21 (Compound 8)
 
_audit_creation_method            SHELXL-97 
_chemical_name_systematic 
; 
 ? 
; 
_chemical_name_common             ? 
_chemical_melting_point           ? 
_chemical_formula_moiety          ? 
_chemical_formula_sum 
 'C26 H25 N2 Nd O13' 
_chemical_formula_weight          717.72 
 
loop_ 
 _atom_type_symbol 
 _atom_type_description 
 _atom_type_scat_dispersion_real 
 _atom_type_scat_dispersion_imag 
 _atom_type_scat_source 
 'C'  'C'   0.0033   0.0016 
 'International Tables Vol C Tables 4.2.6.8 and 6.1.1.4' 
 'H'  'H'   0.0000   0.0000 
 'International Tables Vol C Tables 4.2.6.8 and 6.1.1.4' 
 'N'  'N'   0.0061   0.0033 
 'International Tables Vol C Tables 4.2.6.8 and 6.1.1.4' 
 'O'  'O'   0.0106   0.0060 
 'International Tables Vol C Tables 4.2.6.8 and 6.1.1.4' 
 'Nd'  'Nd'  -0.1943   3.0179 
 'International Tables Vol C Tables 4.2.6.8 and 6.1.1.4' 
 
_symmetry_cell_setting            orthorhombic  
_symmetry_space_group_name_H-M    Pca21 
 
loop_ 
 _symmetry_equiv_pos_as_xyz 
 'x, y, z' 
 '-x, -y, z+1/2' 
 'x+1/2, -y, z' 
 '-x+1/2, y, z+1/2' 
 
_cell_length_a                    8.080(11) 
_cell_length_b                    25.88(3) 
_cell_length_c                    13.345(18) 
_cell_angle_alpha                 90.00 
_cell_angle_beta                  90.00 
_cell_angle_gamma                 90.00 
_cell_volume                      2791(6) 
_cell_formula_units_Z             4 
_cell_measurement_temperature     296(2) 
_cell_measurement_reflns_used     ? 
_cell_measurement_theta_min       ? 
_cell_measurement_theta_max       ? 
 
_exptl_crystal_description        block 
_exptl_crystal_colour             purple 
_exptl_crystal_size_max           0.24 
_exptl_crystal_size_mid           0.22 
_exptl_crystal_size_min           0.20 
_exptl_crystal_density_meas       ? 
_exptl_crystal_density_diffrn     1.708 
_exptl_crystal_density_method     'not measured' 
_exptl_crystal_F_000              1436 
_exptl_absorpt_coefficient_mu     1.932 
_exptl_absorpt_correction_type    multi-scan
_exptl_absorpt_correction_T_min   0.5835 
_exptl_absorpt_correction_T_max   0.6427 
_exptl_absorpt_process_details    SADABS
 
_exptl_special_details 
; 
 ? 
; 
 
_diffrn_ambient_temperature       296(2) 
_diffrn_radiation_wavelength      0.71073 
_diffrn_radiation_type            MoK\a 
_diffrn_radiation_source          'fine-focus sealed tube' 
_diffrn_radiation_monochromator   graphite 
_diffrn_measurement_device_type   'Bruker APEX-II CCD' 
_diffrn_measurement_method        '\f and \w scans' 
_diffrn_detector_area_resol_mean  ? 
_diffrn_standards_number          ? 
_diffrn_standards_interval_count  ? 
_diffrn_standards_interval_time   ? 
_diffrn_standards_decay_%         ? 
_diffrn_reflns_number             18600 
_diffrn_reflns_av_R_equivalents   0.0630 
_diffrn_reflns_av_sigmaI/netI     0.0877 
_diffrn_reflns_limit_h_min        -9 
_diffrn_reflns_limit_h_max        8 
_diffrn_reflns_limit_k_min        -31 
_diffrn_reflns_limit_k_max        31 
_diffrn_reflns_limit_l_min        -15 
_diffrn_reflns_limit_l_max        16 
_diffrn_reflns_theta_min          2.36 
_diffrn_reflns_theta_max          25.50 
_reflns_number_total              5136 
_reflns_number_gt                 4238 
_reflns_threshold_expression      >2sigma(I) 
 
_computing_data_collection        'Bruker APEX2'  
_computing_cell_refinement        'Bruker SAINT' 
_computing_data_reduction         'Bruker SAINT' 
_computing_structure_solution     'SHELXS-97 (Sheldrick, 1990)' 
_computing_structure_refinement   'SHELXL-97 (Sheldrick, 1997)' 
_computing_molecular_graphics     'Bruker SHELXTL' 
_computing_publication_material   'Bruker SHELXTL' 
 
_refine_special_details 
; 
 Refinement of F^2^ against ALL reflections.  The weighted R-factor wR and 
 goodness of fit S are based on F^2^, conventional R-factors R are based 
 on F, with F set to zero for negative F^2^. The threshold expression of 
 F^2^ > 2sigma(F^2^) is used only for calculating R-factors(gt) etc. and is 
 not relevant to the choice of reflections for refinement.  R-factors based 
 on F^2^ are statistically about twice as large as those based on F, and R- 
 factors based on ALL data will be even larger. 
; 
 
_refine_ls_structure_factor_coef  Fsqd  
_refine_ls_matrix_type            full 
_refine_ls_weighting_scheme       calc  
_refine_ls_weighting_details 
 'calc w=1/[\s^2^(Fo^2^)+(0.1015P)^2^+0.0000P] where P=(Fo^2^+2Fc^2^)/3' 
_atom_sites_solution_primary      direct 
_atom_sites_solution_secondary    difmap 
_atom_sites_solution_hydrogens    geom 
_refine_ls_hydrogen_treatment     constr 
_refine_ls_extinction_method      none 
_refine_ls_extinction_coef        ? 
_refine_ls_abs_structure_details 
 'Flack H D (1983), Acta Cryst. A39, 876-881' 
_refine_ls_abs_structure_Flack    0.58(3) 
_refine_ls_number_reflns          5136 
_refine_ls_number_parameters      378 
_refine_ls_number_restraints      4 
_refine_ls_R_factor_all           0.0829 
_refine_ls_R_factor_gt            0.0693 
_refine_ls_wR_factor_ref          0.1936 
_refine_ls_wR_factor_gt           0.1811 
_refine_ls_goodness_of_fit_ref    1.198 
_refine_ls_restrained_S_all       1.198 
_refine_ls_shift/su_max           0.001 
_refine_ls_shift/su_mean          0.000 
 
loop_ 
 _atom_site_label 
 _atom_site_type_symbol 
 _atom_site_fract_x 
 _atom_site_fract_y 
 _atom_site_fract_z 
 _atom_site_U_iso_or_equiv 
 _atom_site_adp_type 
 _atom_site_occupancy 
 _atom_site_symmetry_multiplicity 
 _atom_site_calc_flag 
 _atom_site_refinement_flags 
 _atom_site_disorder_assembly 
 _atom_site_disorder_group 
Nd1 Nd 0.98689(6) 0.257952(19) 1.00023(10) 0.0347(2) Uani 1 1 d . . . 
C14 C 0.7382(11) 0.2040(3) 0.8420(7) 0.0204(19) Uani 1 1 d . . . 
H14 H 0.7497 0.2367 0.8140 0.025 Uiso 1 1 calc R . . 
O8 O 0.5157(11) 0.0775(4) 1.2265(7) 0.052(2) Uani 1 1 d . . . 
C19 C 0.8074(11) 0.1460(3) 0.9679(7) 0.022(2) Uani 1 1 d . . . 
H19 H 0.8678 0.1383 1.0253 0.027 Uiso 1 1 calc R . . 
C17 C 0.6119(10) 0.1216(3) 0.8447(6) 0.0163(18) Uani 1 1 d . . . 
H17 H 0.5362 0.0981 0.8186 0.020 Uiso 1 1 calc R . . 
C18 C 0.7005(10) 0.1086(3) 0.9292(6) 0.0193(19) Uani 1 1 d . . . 
N1 N 0.8263(9) 0.1922(3) 0.9260(5) 0.0179(16) Uani 1 1 d . . . 
C15 C 0.6329(11) 0.1692(3) 0.7973(6) 0.0200(19) Uani 1 1 d . . . 
C20 C 0.6847(11) 0.0563(3) 0.9760(7) 0.023(2) Uani 1 1 d . . . 
O7 O 0.5216(11) 0.1326(3) 1.1037(7) 0.0453(15) Uani 1 1 d . . . 
C26 C 0.5608(16) 0.0902(5) 1.1349(9) 0.041(3) Uani 1 1 d . . . 
C25 C 0.6231(12) 0.0473(4) 1.0731(8) 0.027(2) Uani 1 1 d . . . 
C23 C 0.6635(16) -0.0446(5) 1.0517(10) 0.044(3) Uani 1 1 d . . . 
H23 H 0.6614 -0.0780 1.0776 0.053 Uiso 1 1 calc R . . 
C22 C 0.7165(17) -0.0360(4) 0.9554(10) 0.043(3) Uani 1 1 d . . . 
H22 H 0.7409 -0.0639 0.9143 0.051 Uiso 1 1 calc R . . 
C21 C 0.7342(15) 0.0140(4) 0.9184(9) 0.037(3) Uani 1 1 d . . . 
H21 H 0.7791 0.0192 0.8551 0.044 Uiso 1 1 calc R . . 
C24 C 0.6137(14) -0.0035(4) 1.1094(8) 0.037(3) Uani 1 1 d . . . 
H24 H 0.5731 -0.0094 1.1736 0.044 Uiso 1 1 calc R . . 
C16 C 0.5431(11) 0.1837(3) 0.7025(7) 0.0187(19) Uani 1 1 d . . . 
O5 O 0.4178(8) 0.1551(3) 0.6805(5) 0.0270(16) Uani 1 1 d . . . 
O6 O 0.5943(12) 0.2208(3) 0.6539(6) 0.0453(15) Uani 1 1 d . . . 
C1 C 1.0755(14) 0.3079(4) 0.8157(7) 0.029(2) Uani 1 1 d . . . 
O1 O 1.1344(10) 0.2644(3) 0.8503(5) 0.0385(18) Uani 1 1 d . . . 
O2 O 0.9593(10) 0.3307(3) 0.8566(6) 0.0372(18) Uani 1 1 d . . . 
C2 C 1.1608(11) 0.3290(3) 0.7244(6) 0.0197(19) Uani 1 1 d . . . 
C3 C 1.1221(12) 0.3779(3) 0.6861(7) 0.025(2) Uani 1 1 d . . . 
H3 H 1.0487 0.3992 0.7202 0.030 Uiso 1 1 calc R . . 
C6 C 1.2775(11) 0.3003(3) 0.6734(7) 0.0205(19) Uani 1 1 d . . . 
H6 H 1.3083 0.2686 0.7004 0.025 Uiso 1 1 calc R . . 
C4 C 1.1941(11) 0.3947(3) 0.5960(6) 0.0193(19) Uani 1 1 d . . . 
C5 C 1.3057(12) 0.3612(3) 0.5532(6) 0.0215(19) Uani 1 1 d . . . 
H5 H 1.3562 0.3718 0.4940 0.026 Uiso 1 1 calc R . . 
N2 N 1.3483(9) 0.3149(3) 0.5889(5) 0.0177(15) Uani 1 1 d . . . 
C7 C 1.1626(11) 0.4472(4) 0.5546(7) 0.022(2) Uani 1 1 d . . . 
C8 C 1.2165(13) 0.4881(4) 0.6099(9) 0.034(3) Uani 1 1 d . . . 
H8 H 1.2654 0.4827 0.6721 0.041 Uiso 1 1 calc R . . 
C9 C 1.1975(15) 0.5395(4) 0.5713(12) 0.045(3) Uani 1 1 d . . . 
H9 H 1.2267 0.5679 0.6099 0.055 Uiso 1 1 calc R . . 
C10 C 1.1351(13) 0.5460(4) 0.4758(10) 0.044(4) Uani 1 1 d . . . 
H10 H 1.1295 0.5790 0.4484 0.053 Uiso 1 1 calc R . . 
C11 C 1.0802(13) 0.5038(4) 0.4200(9) 0.037(3) Uani 1 1 d . . . 
H11 H 1.0342 0.5087 0.3568 0.044 Uiso 1 1 calc R . . 
C12 C 1.0953(12) 0.4537(4) 0.4603(8) 0.027(2) Uani 1 1 d . . . 
C13 C 1.0193(13) 0.4106(5) 0.4034(10) 0.036(3) Uani 1 1 d . . . 
O3 O 0.9648(10) 0.3721(3) 0.4423(7) 0.045(2) Uani 1 1 d . . . 
O4 O 1.0081(10) 0.4193(4) 0.3055(7) 0.050(2) Uani 1 1 d . . . 
H4 H 1.0795 0.4027 0.2761 0.075 Uiso 1 1 calc RD . . 
O9 O 1.2103(9) 0.1964(3) 1.0161(6) 0.0343(17) Uani 1 1 d . . . 
H1W H 1.2662 0.1696 1.0266 0.18(10) Uiso 1 1 d R . . 
H2W H 1.2861 0.2083 0.9798 0.03(3) Uiso 1 1 d RD . . 
O10 O 0.7465(9) 0.3037(3) 1.0397(5) 0.0306(16) Uani 1 1 d . . . 
H3W H 0.6989 0.3151 0.9874 0.02(2) Uiso 1 1 d R . . 
H4W H 0.6768 0.2798 1.0380 0.03(3) Uiso 1 1 d R . . 
O11 O 0.1654(10) 0.1540(3) 0.8154(6) 0.041(2) Uani 1 1 d . . . 
H5W H 0.2447 0.1545 0.7736 0.049 Uiso 1 1 d R . . 
H6W H 0.1088 0.1303 0.7879 0.049 Uiso 1 1 d R . . 
O12 O 0.8091(11) 0.3507(4) 0.2301(7) 0.064(3) Uani 1 1 d D . . 
H7W H 0.8744 0.3732 0.2542 0.077 Uiso 1 1 d RD . . 
H8W H 0.7270 0.3447 0.2683 0.077 Uiso 1 1 d R . . 
O13 O 1.5218(11) 0.2364(4) 1.1018(13) 0.087(5) Uani 1 1 d . . . 
H9W H 1.4318 0.2250 1.0773 0.105 Uiso 1 1 d RD . . 
H10W H 1.5265 0.2036 1.1035 0.105 Uiso 1 1 d R . . 
 
loop_ 
 _atom_site_aniso_label 
 _atom_site_aniso_U_11 
 _atom_site_aniso_U_22 
 _atom_site_aniso_U_33 
 _atom_site_aniso_U_23 
 _atom_site_aniso_U_13 
 _atom_site_aniso_U_12 
Nd1 0.0395(3) 0.0359(3) 0.0288(3) 0.0024(5) 0.0005(4) -0.0045(2) 
C14 0.018(5) 0.019(4) 0.024(5) -0.003(4) -0.003(4) -0.006(4) 
O8 0.080(7) 0.052(6) 0.026(5) 0.010(4) 0.005(4) 0.010(4) 
C19 0.026(5) 0.020(4) 0.022(5) 0.006(3) -0.008(3) -0.004(4) 
C17 0.013(4) 0.017(4) 0.018(5) 0.008(3) -0.003(3) -0.005(3) 
C18 0.020(5) 0.020(5) 0.018(5) 0.011(3) 0.007(3) 0.001(3) 
N1 0.023(4) 0.018(4) 0.013(4) -0.001(3) 0.000(3) -0.002(3) 
C15 0.020(5) 0.030(5) 0.010(4) 0.003(4) 0.001(3) 0.000(4) 
C20 0.024(5) 0.019(4) 0.027(7) -0.001(4) -0.004(4) -0.009(3) 
O7 0.077(4) 0.026(3) 0.033(3) 0.008(2) 0.020(3) 0.008(3) 
C26 0.050(7) 0.044(7) 0.030(7) 0.007(5) 0.021(5) -0.018(6) 
C25 0.030(5) 0.018(5) 0.034(6) 0.008(4) -0.014(4) -0.003(4) 
C23 0.053(8) 0.028(6) 0.051(8) 0.013(6) -0.002(6) -0.004(5) 
C22 0.058(9) 0.015(5) 0.055(7) -0.003(5) -0.006(6) 0.007(5) 
C21 0.047(7) 0.035(6) 0.029(6) 0.001(5) 0.005(5) 0.006(5) 
C24 0.046(7) 0.030(6) 0.035(6) 0.013(5) 0.000(5) -0.004(5) 
C16 0.025(5) 0.020(5) 0.011(5) -0.003(3) -0.002(4) 0.007(4) 
O5 0.023(4) 0.034(4) 0.024(4) 0.000(3) -0.013(3) -0.005(3) 
O6 0.077(4) 0.026(3) 0.033(3) 0.008(2) 0.020(3) 0.008(3) 
C1 0.046(7) 0.038(6) 0.003(4) 0.002(4) 0.001(4) -0.021(5) 
O1 0.053(5) 0.042(5) 0.020(4) 0.012(3) 0.009(3) 0.003(4) 
O2 0.038(4) 0.054(5) 0.020(4) -0.003(3) 0.012(3) 0.003(4) 
C2 0.025(5) 0.023(5) 0.011(4) 0.008(3) 0.010(4) -0.002(4) 
C3 0.033(5) 0.021(5) 0.020(5) -0.005(4) 0.011(4) 0.002(4) 
C6 0.018(5) 0.012(4) 0.031(5) 0.004(3) 0.000(4) 0.000(3) 
C4 0.024(5) 0.016(4) 0.018(5) 0.002(3) -0.006(4) 0.002(3) 
C5 0.038(5) 0.018(5) 0.008(4) 0.002(3) 0.006(4) 0.005(4) 
N2 0.025(4) 0.021(4) 0.007(4) 0.000(3) 0.000(3) 0.002(3) 
C7 0.016(5) 0.021(5) 0.029(6) -0.002(4) 0.008(4) 0.007(4) 
C8 0.032(6) 0.027(6) 0.043(7) 0.000(5) -0.001(5) 0.001(4) 
C9 0.038(7) 0.013(5) 0.085(10) 0.001(6) 0.011(7) -0.002(4) 
C10 0.034(6) 0.012(5) 0.087(12) 0.006(5) 0.008(6) 0.006(4) 
C11 0.037(6) 0.033(6) 0.041(7) 0.015(5) 0.000(5) -0.003(5) 
C12 0.022(5) 0.022(5) 0.039(6) 0.008(4) 0.003(4) -0.001(4) 
C13 0.033(6) 0.039(7) 0.037(7) 0.012(5) -0.003(5) 0.010(5) 
O3 0.057(5) 0.033(5) 0.044(5) 0.016(4) -0.015(4) -0.021(4) 
O4 0.057(6) 0.060(6) 0.033(6) 0.001(4) -0.002(4) -0.010(4) 
O9 0.037(4) 0.038(4) 0.027(4) 0.010(3) 0.002(3) 0.011(3) 
O10 0.033(4) 0.032(4) 0.027(4) 0.004(3) -0.010(3) 0.007(3) 
O11 0.041(5) 0.056(5) 0.026(4) -0.008(3) 0.005(4) -0.021(4) 
O12 0.054(6) 0.086(7) 0.052(6) -0.018(5) 0.008(5) -0.038(5) 
O13 0.039(6) 0.045(7) 0.179(18) -0.005(8) 0.012(7) 0.001(4) 
 
_geom_special_details 
; 
 All esds (except the esd in the dihedral angle between two l.s. planes) 
 are estimated using the full covariance matrix.  The cell esds are taken 
 into account individually in the estimation of esds in distances, angles 
 and torsion angles; correlations between esds in cell parameters are only 
 used when they are defined by crystal symmetry.  An approximate (isotropic) 
 treatment of cell esds is used for estimating esds involving l.s. planes. 
; 
 
loop_ 
 _geom_bond_atom_site_label_1 
 _geom_bond_atom_site_label_2 
 _geom_bond_distance 
 _geom_bond_site_symmetry_2 
 _geom_bond_publ_flag 
Nd1 N2 2.311(7) 4_755 ? 
Nd1 O1 2.335(8) . ? 
Nd1 O10 2.336(8) . ? 
Nd1 N1 2.359(7) . ? 
Nd1 O6 2.359(9) 4_655 ? 
Nd1 O9 2.416(7) . ? 
Nd1 O2 2.696(9) . ? 
Nd1 H4W 2.6172 . ? 
C14 N1 1.363(11) . ? 
C14 C15 1.376(12) . ? 
C14 H14 0.9300 . ? 
O8 C26 1.317(14) . ? 
C19 N1 1.328(11) . ? 
C19 C18 1.396(12) . ? 
C19 H19 0.9300 . ? 
C17 C18 1.377(12) . ? 
C17 C15 1.395(12) . ? 
C17 H17 0.9300 . ? 
C18 C20 1.498(12) . ? 
C15 C16 1.505(12) . ? 
C20 C21 1.397(15) . ? 
C20 C25 1.407(14) . ? 
O7 C26 1.215(15) . ? 
C26 C25 1.472(16) . ? 
C25 C24 1.403(14) . ? 
C23 C22 1.373(17) . ? 
C23 C24 1.374(17) . ? 
C23 H23 0.9300 . ? 
C22 C21 1.391(15) . ? 
C22 H22 0.9300 . ? 
C21 H21 0.9300 . ? 
C24 H24 0.9300 . ? 
C16 O6 1.230(12) . ? 
C16 O5 1.288(12) . ? 
O6 Nd1 2.359(9) 4_654 ? 
C1 O2 1.236(14) . ? 
C1 O1 1.306(13) . ? 
C1 C2 1.503(12) . ? 
C2 C6 1.380(12) . ? 
C2 C3 1.400(12) . ? 
C3 C4 1.405(12) . ? 
C3 H3 0.9300 . ? 
C6 N2 1.320(12) . ? 
C6 H6 0.9300 . ? 
C4 C5 1.376(12) . ? 
C4 C7 1.488(12) . ? 
C5 N2 1.336(11) . ? 
C5 H5 0.9300 . ? 
N2 Nd1 2.311(7) 4_754 ? 
C7 C8 1.361(15) . ? 
C7 C12 1.382(14) . ? 
C8 C9 1.435(15) . ? 
C8 H8 0.9300 . ? 
C9 C10 1.380(18) . ? 
C9 H9 0.9300 . ? 
C10 C11 1.395(16) . ? 
C10 H10 0.9300 . ? 
C11 C12 1.409(14) . ? 
C11 H11 0.9300 . ? 
C12 C13 1.482(17) . ? 
C13 O3 1.208(14) . ? 
C13 O4 1.328(16) . ? 
O4 H4 0.8200 . ? 
O9 H1W 0.8405 . ? 
O9 H2W 0.8390 . ? 
O10 H3W 0.8487 . ? 
O10 H4W 0.8376 . ? 
O11 H5W 0.8500 . ? 
O11 H6W 0.8493 . ? 
O12 H7W 0.8486 . ? 
O12 H8W 0.8504 . ? 
O13 H9W 0.8493 . ? 
O13 H10W 0.8493 . ? 
 
loop_ 
 _geom_angle_atom_site_label_1 
 _geom_angle_atom_site_label_2 
 _geom_angle_atom_site_label_3 
 _geom_angle 
 _geom_angle_site_symmetry_1 
 _geom_angle_site_symmetry_3 
 _geom_angle_publ_flag 
N2 Nd1 O1 95.7(3) 4_755 . ? 
N2 Nd1 O10 92.3(3) 4_755 . ? 
O1 Nd1 O10 125.5(3) . . ? 
N2 Nd1 N1 172.7(3) 4_755 . ? 
O1 Nd1 N1 88.4(3) . . ? 
O10 Nd1 N1 90.2(3) . . ? 
N2 Nd1 O6 88.6(3) 4_755 4_655 ? 
O1 Nd1 O6 156.4(3) . 4_655 ? 
O10 Nd1 O6 77.3(3) . 4_655 ? 
N1 Nd1 O6 85.3(3) . 4_655 ? 
N2 Nd1 O9 86.8(3) 4_755 . ? 
O1 Nd1 O9 75.0(3) . . ? 
O10 Nd1 O9 159.4(3) . . ? 
N1 Nd1 O9 88.4(3) . . ? 
O6 Nd1 O9 82.1(3) 4_655 . ? 
N2 Nd1 O2 88.1(3) 4_755 . ? 
O1 Nd1 O2 51.9(2) . . ? 
O10 Nd1 O2 74.8(2) . . ? 
N1 Nd1 O2 99.2(3) . . ? 
O6 Nd1 O2 151.7(3) 4_655 . ? 
O9 Nd1 O2 125.7(2) . . ? 
N2 Nd1 H4W 108.4 4_755 . ? 
O1 Nd1 H4W 129.7 . . ? 
O10 Nd1 H4W 18.4 . . ? 
N1 Nd1 H4W 73.2 . . ? 
O6 Nd1 H4W 69.8 4_655 . ? 
O9 Nd1 H4W 147.2 . . ? 
O2 Nd1 H4W 84.7 . . ? 
N1 C14 C15 122.2(8) . . ? 
N1 C14 H14 118.9 . . ? 
C15 C14 H14 118.9 . . ? 
N1 C19 C18 122.6(8) . . ? 
N1 C19 H19 118.7 . . ? 
C18 C19 H19 118.7 . . ? 
C18 C17 C15 121.6(8) . . ? 
C18 C17 H17 119.2 . . ? 
C15 C17 H17 119.2 . . ? 
C17 C18 C19 117.1(8) . . ? 
C17 C18 C20 121.2(8) . . ? 
C19 C18 C20 121.6(8) . . ? 
C19 N1 C14 119.3(7) . . ? 
C19 N1 Nd1 122.4(6) . . ? 
C14 N1 Nd1 118.0(5) . . ? 
C14 C15 C17 117.2(8) . . ? 
C14 C15 C16 120.0(8) . . ? 
C17 C15 C16 122.8(8) . . ? 
C21 C20 C25 118.6(9) . . ? 
C21 C20 C18 117.1(9) . . ? 
C25 C20 C18 124.3(8) . . ? 
O7 C26 O8 118.2(12) . . ? 
O7 C26 C25 125.3(10) . . ? 
O8 C26 C25 115.2(10) . . ? 
C24 C25 C20 119.4(10) . . ? 
C24 C25 C26 119.6(10) . . ? 
C20 C25 C26 120.8(8) . . ? 
C22 C23 C24 119.3(11) . . ? 
C22 C23 H23 120.3 . . ? 
C24 C23 H23 120.3 . . ? 
C23 C22 C21 121.1(12) . . ? 
C23 C22 H22 119.5 . . ? 
C21 C22 H22 119.5 . . ? 
C20 C21 C22 120.2(11) . . ? 
C20 C21 H21 119.9 . . ? 
C22 C21 H21 119.9 . . ? 
C23 C24 C25 121.1(11) . . ? 
C23 C24 H24 119.5 . . ? 
C25 C24 H24 119.5 . . ? 
O6 C16 O5 126.4(9) . . ? 
O6 C16 C15 118.3(9) . . ? 
O5 C16 C15 115.3(8) . . ? 
C16 O6 Nd1 133.1(8) . 4_654 ? 
O2 C1 O1 122.2(8) . . ? 
O2 C1 C2 122.2(10) . . ? 
O1 C1 C2 115.6(9) . . ? 
C1 O1 Nd1 100.3(6) . . ? 
C1 O2 Nd1 85.3(6) . . ? 
C6 C2 C3 117.3(8) . . ? 
C6 C2 C1 121.2(8) . . ? 
C3 C2 C1 121.5(9) . . ? 
C2 C3 C4 120.1(8) . . ? 
C2 C3 H3 120.0 . . ? 
C4 C3 H3 120.0 . . ? 
N2 C6 C2 124.4(8) . . ? 
N2 C6 H6 117.8 . . ? 
C2 C6 H6 117.8 . . ? 
C5 C4 C3 115.5(8) . . ? 
C5 C4 C7 122.3(8) . . ? 
C3 C4 C7 122.0(8) . . ? 
N2 C5 C4 125.9(8) . . ? 
N2 C5 H5 117.0 . . ? 
C4 C5 H5 117.0 . . ? 
C6 N2 C5 116.7(8) . . ? 
C6 N2 Nd1 120.4(6) . 4_754 ? 
C5 N2 Nd1 122.5(6) . 4_754 ? 
C8 C7 C12 121.6(10) . . ? 
C8 C7 C4 117.0(9) . . ? 
C12 C7 C4 121.1(9) . . ? 
C7 C8 C9 119.4(11) . . ? 
C7 C8 H8 120.3 . . ? 
C9 C8 H8 120.3 . . ? 
C10 C9 C8 119.0(12) . . ? 
C10 C9 H9 120.5 . . ? 
C8 C9 H9 120.5 . . ? 
C9 C10 C11 120.9(10) . . ? 
C9 C10 H10 119.6 . . ? 
C11 C10 H10 119.6 . . ? 
C10 C11 C12 119.3(11) . . ? 
C10 C11 H11 120.4 . . ? 
C12 C11 H11 120.4 . . ? 
C7 C12 C11 119.6(10) . . ? 
C7 C12 C13 122.5(10) . . ? 
C11 C12 C13 117.4(10) . . ? 
O3 C13 O4 122.5(12) . . ? 
O3 C13 C12 123.5(12) . . ? 
O4 C13 C12 113.9(10) . . ? 
C13 O4 H4 109.5 . . ? 
Nd1 O9 H1W 163.9 . . ? 
Nd1 O9 H2W 104.7 . . ? 
H1W O9 H2W 90.4 . . ? 
Nd1 O10 H3W 111.5 . . ? 
Nd1 O10 H4W 100.2 . . ? 
H3W O10 H4W 86.0 . . ? 
H5W O11 H6W 97.7 . . ? 
H7W O12 H8W 112.6 . . ? 
H9W O13 H10W 72.7 . . ? 
 
loop_ 
 _geom_torsion_atom_site_label_1 
 _geom_torsion_atom_site_label_2 
 _geom_torsion_atom_site_label_3 
 _geom_torsion_atom_site_label_4 
 _geom_torsion 
 _geom_torsion_site_symmetry_1 
 _geom_torsion_site_symmetry_2 
 _geom_torsion_site_symmetry_3 
 _geom_torsion_site_symmetry_4 
 _geom_torsion_publ_flag 
C15 C17 C18 C19 2.6(13) . . . . ? 
C15 C17 C18 C20 -176.3(8) . . . . ? 
N1 C19 C18 C17 -0.7(13) . . . . ? 
N1 C19 C18 C20 178.3(8) . . . . ? 
C18 C19 N1 C14 0.2(13) . . . . ? 
C18 C19 N1 Nd1 173.9(7) . . . . ? 
C15 C14 N1 C19 -1.7(13) . . . . ? 
C15 C14 N1 Nd1 -175.7(7) . . . . ? 
N2 Nd1 N1 C19 2(2) 4_755 . . . ? 
O1 Nd1 N1 C19 126.2(7) . . . . ? 
O10 Nd1 N1 C19 -108.2(7) . . . . ? 
O6 Nd1 N1 C19 -31.0(7) 4_655 . . . ? 
O9 Nd1 N1 C19 51.2(7) . . . . ? 
O2 Nd1 N1 C19 177.2(7) . . . . ? 
N2 Nd1 N1 C14 175.8(18) 4_755 . . . ? 
O1 Nd1 N1 C14 -60.0(6) . . . . ? 
O10 Nd1 N1 C14 65.6(6) . . . . ? 
O6 Nd1 N1 C14 142.8(6) 4_655 . . . ? 
O9 Nd1 N1 C14 -135.0(6) . . . . ? 
O2 Nd1 N1 C14 -9.0(6) . . . . ? 
N1 C14 C15 C17 3.6(13) . . . . ? 
N1 C14 C15 C16 -177.8(8) . . . . ? 
C18 C17 C15 C14 -4.0(13) . . . . ? 
C18 C17 C15 C16 177.4(8) . . . . ? 
C17 C18 C20 C21 62.9(12) . . . . ? 
C19 C18 C20 C21 -115.9(10) . . . . ? 
C17 C18 C20 C25 -116.7(10) . . . . ? 
C19 C18 C20 C25 64.4(13) . . . . ? 
C21 C20 C25 C24 0.3(14) . . . . ? 
C18 C20 C25 C24 180.0(9) . . . . ? 
C21 C20 C25 C26 -176.6(10) . . . . ? 
C18 C20 C25 C26 3.0(15) . . . . ? 
O7 C26 C25 C24 -159.5(12) . . . . ? 
O8 C26 C25 C24 7.0(16) . . . . ? 
O7 C26 C25 C20 17.5(18) . . . . ? 
O8 C26 C25 C20 -176.1(10) . . . . ? 
C24 C23 C22 C21 6(2) . . . . ? 
C25 C20 C21 C22 2.4(16) . . . . ? 
C18 C20 C21 C22 -177.3(11) . . . . ? 
C23 C22 C21 C20 -5.5(19) . . . . ? 
C22 C23 C24 C25 -2.9(19) . . . . ? 
C20 C25 C24 C23 -0.1(17) . . . . ? 
C26 C25 C24 C23 176.9(11) . . . . ? 
C14 C15 C16 O6 17.2(13) . . . . ? 
C17 C15 C16 O6 -164.2(9) . . . . ? 
C14 C15 C16 O5 -162.7(8) . . . . ? 
C17 C15 C16 O5 15.8(13) . . . . ? 
O5 C16 O6 Nd1 -3.1(15) . . . 4_654 ? 
C15 C16 O6 Nd1 176.9(6) . . . 4_654 ? 
O2 C1 O1 Nd1 -7.0(11) . . . . ? 
C2 C1 O1 Nd1 171.7(7) . . . . ? 
N2 Nd1 O1 C1 -79.6(6) 4_755 . . . ? 
O10 Nd1 O1 C1 17.3(7) . . . . ? 
N1 Nd1 O1 C1 106.5(6) . . . . ? 
O6 Nd1 O1 C1 -179.1(6) 4_655 . . . ? 
O9 Nd1 O1 C1 -164.8(7) . . . . ? 
O2 Nd1 O1 C1 3.5(6) . . . . ? 
O1 C1 O2 Nd1 6.0(10) . . . . ? 
C2 C1 O2 Nd1 -172.6(9) . . . . ? 
N2 Nd1 O2 C1 95.1(6) 4_755 . . . ? 
O1 Nd1 O2 C1 -3.6(6) . . . . ? 
O10 Nd1 O2 C1 -171.9(7) . . . . ? 
N1 Nd1 O2 C1 -84.3(6) . . . . ? 
O6 Nd1 O2 C1 178.6(6) 4_655 . . . ? 
O9 Nd1 O2 C1 10.4(7) . . . . ? 
O2 C1 C2 C6 -172.6(10) . . . . ? 
O1 C1 C2 C6 8.7(13) . . . . ? 
O2 C1 C2 C3 5.6(15) . . . . ? 
O1 C1 C2 C3 -173.1(9) . . . . ? 
C6 C2 C3 C4 3.5(14) . . . . ? 
C1 C2 C3 C4 -174.7(8) . . . . ? 
C3 C2 C6 N2 -3.4(14) . . . . ? 
C1 C2 C6 N2 174.9(8) . . . . ? 
C2 C3 C4 C5 -2.4(13) . . . . ? 
C2 C3 C4 C7 -177.2(9) . . . . ? 
C3 C4 C5 N2 0.9(14) . . . . ? 
C7 C4 C5 N2 175.8(9) . . . . ? 
C2 C6 N2 C5 2.0(13) . . . . ? 
C2 C6 N2 Nd1 -171.2(7) . . . 4_754 ? 
C4 C5 N2 C6 -0.7(14) . . . . ? 
C4 C5 N2 Nd1 172.4(7) . . . 4_754 ? 
C5 C4 C7 C8 -110.4(11) . . . . ? 
C3 C4 C7 C8 64.1(12) . . . . ? 
C5 C4 C7 C12 63.8(12) . . . . ? 
C3 C4 C7 C12 -121.7(10) . . . . ? 
C12 C7 C8 C9 2.5(15) . . . . ? 
C4 C7 C8 C9 176.7(9) . . . . ? 
C7 C8 C9 C10 -4.4(16) . . . . ? 
C8 C9 C10 C11 4.5(17) . . . . ? 
C9 C10 C11 C12 -2.6(16) . . . . ? 
C8 C7 C12 C11 -0.6(14) . . . . ? 
C4 C7 C12 C11 -174.6(10) . . . . ? 
C8 C7 C12 C13 -173.2(10) . . . . ? 
C4 C7 C12 C13 12.8(13) . . . . ? 
C10 C11 C12 C7 0.6(15) . . . . ? 
C10 C11 C12 C13 173.6(10) . . . . ? 
C7 C12 C13 O3 23.2(16) . . . . ? 
C11 C12 C13 O3 -149.6(11) . . . . ? 
C7 C12 C13 O4 -160.3(9) . . . . ? 
C11 C12 C13 O4 26.9(14) . . . . ? 
 
_diffrn_measured_fraction_theta_max    0.994 
_diffrn_reflns_theta_full              25.50 
_diffrn_measured_fraction_theta_full   0.994 
_refine_diff_density_max    1.577 
_refine_diff_density_min   -2.786 
_refine_diff_density_rms    0.181 

#===END
 
data_p-1 (Compound 9)
 
_audit_creation_method            SHELXL-97 
_chemical_name_systematic 
; 
 ? 
; 
_chemical_name_common             ? 
_chemical_melting_point           ? 
_chemical_formula_moiety          ? 
_chemical_formula_sum 
 'C38 H27 N4 O10 Pr' 
_chemical_formula_weight          840.55 
 
loop_ 
 _atom_type_symbol 
 _atom_type_description 
 _atom_type_scat_dispersion_real 
 _atom_type_scat_dispersion_imag 
 _atom_type_scat_source 
 'C'  'C'   0.0033   0.0016 
 'International Tables Vol C Tables 4.2.6.8 and 6.1.1.4' 
 'H'  'H'   0.0000   0.0000 
 'International Tables Vol C Tables 4.2.6.8 and 6.1.1.4' 
 'N'  'N'   0.0061   0.0033 
 'International Tables Vol C Tables 4.2.6.8 and 6.1.1.4' 
 'O'  'O'   0.0106   0.0060 
 'International Tables Vol C Tables 4.2.6.8 and 6.1.1.4' 
 'Pr'  'Pr'  -0.2180   2.8214 
 'International Tables Vol C Tables 4.2.6.8 and 6.1.1.4' 
 
_symmetry_cell_setting            Triclinic 
_symmetry_space_group_name_H-M    P-1 
 
loop_ 
 _symmetry_equiv_pos_as_xyz 
 'x, y, z' 
 '-x, -y, -z' 
 
_cell_length_a                    9.173(5) 
_cell_length_b                    13.657(7) 
_cell_length_c                    14.292(7) 
_cell_angle_alpha                 97.179(4) 
_cell_angle_beta                  96.766(5) 
_cell_angle_gamma                 104.724(4) 
_cell_volume                      1697.1(15) 
_cell_formula_units_Z             2 
_cell_measurement_temperature     296(2) 
_cell_measurement_reflns_used     ? 
_cell_measurement_theta_min       ? 
_cell_measurement_theta_max       ? 
 
_exptl_crystal_description        block
_exptl_crystal_colour             yellow 
_exptl_crystal_size_max           0.28 
_exptl_crystal_size_mid           0.26 
_exptl_crystal_size_min           0.24 
_exptl_crystal_density_meas       ? 
_exptl_crystal_density_diffrn     1.645 
_exptl_crystal_density_method     'not measured' 
_exptl_crystal_F_000              844 
_exptl_absorpt_coefficient_mu     1.503 
_exptl_absorpt_correction_type    multi-scan 
_exptl_absorpt_correction_T_min   0.6782 
_exptl_absorpt_correction_T_max   0.7142 
_exptl_absorpt_process_details    ? 
 
_exptl_special_details 
; 
 ? 
; 
 
_diffrn_ambient_temperature       296(2) 
_diffrn_radiation_wavelength      0.71073 
_diffrn_radiation_type            MoK\a 
_diffrn_radiation_source          'fine-focus sealed tube' 
_diffrn_radiation_monochromator   graphite 
_diffrn_measurement_device_type   'Bruker APEX-II CCD'
_diffrn_measurement_method        '\f and \w scans' 
_diffrn_detector_area_resol_mean  ? 
_diffrn_reflns_number             12305 
_diffrn_reflns_av_R_equivalents   0.0405 
_diffrn_reflns_av_sigmaI/netI     0.0679 
_diffrn_reflns_limit_h_min        -10 
_diffrn_reflns_limit_h_max        11 
_diffrn_reflns_limit_k_min        -16 
_diffrn_reflns_limit_k_max        16 
_diffrn_reflns_limit_l_min        -17 
_diffrn_reflns_limit_l_max        17 
_diffrn_reflns_theta_min          2.30 
_diffrn_reflns_theta_max          25.50 
_reflns_number_total              6221 
_reflns_number_gt                 5227 
_reflns_threshold_expression      >2sigma(I) 
 
_computing_data_collection        'Bruker APEX2' 
_computing_cell_refinement        'Bruker SAINT' 
_computing_data_reduction         'Bruker SAINT' 
_computing_structure_solution     'SHELXS-97 (Sheldrick, 2008)' 
_computing_structure_refinement   'SHELXL-97 (Sheldrick, 2008)' 
_computing_molecular_graphics     'Bruker SHELXTL' 
_computing_publication_material   'Bruker SHELXTL' 
 
_refine_special_details 
; 
 Refinement of F^2^ against ALL reflections.  The weighted R-factor wR and 
 goodness of fit S are based on F^2^, conventional R-factors R are based 
 on F, with F set to zero for negative F^2^. The threshold expression of 
 F^2^ > 2sigma(F^2^) is used only for calculating R-factors(gt) etc. and is 
 not relevant to the choice of reflections for refinement.  R-factors based 
 on F^2^ are statistically about twice as large as those based on F, and R- 
 factors based on ALL data will be even larger. 
; 
 
_refine_ls_structure_factor_coef  Fsqd  
_refine_ls_matrix_type            full 
_refine_ls_weighting_scheme       calc  
_refine_ls_weighting_details 
 'calc w=1/[\s^2^(Fo^2^)+(0.0201P)^2^+2.9240P] where P=(Fo^2^+2Fc^2^)/3' 
_atom_sites_solution_primary      direct 
_atom_sites_solution_secondary    difmap 
_atom_sites_solution_hydrogens    geom 
_refine_ls_hydrogen_treatment     constr 
_refine_ls_extinction_method      none 
_refine_ls_extinction_coef        ? 
_refine_ls_number_reflns          6221 
_refine_ls_number_parameters      480 
_refine_ls_number_restraints      2 
_refine_ls_R_factor_all           0.0543 
_refine_ls_R_factor_gt            0.0426 
_refine_ls_wR_factor_ref          0.0812 
_refine_ls_wR_factor_gt           0.0774 
_refine_ls_goodness_of_fit_ref    1.022 
_refine_ls_restrained_S_all       1.022 
_refine_ls_shift/su_max           0.002 
_refine_ls_shift/su_mean          0.000 
 
loop_ 
 _atom_site_label 
 _atom_site_type_symbol 
 _atom_site_fract_x 
 _atom_site_fract_y 
 _atom_site_fract_z 
 _atom_site_U_iso_or_equiv 
 _atom_site_adp_type 
 _atom_site_occupancy 
 _atom_site_symmetry_multiplicity 
 _atom_site_calc_flag 
 _atom_site_refinement_flags 
 _atom_site_disorder_assembly 
 _atom_site_disorder_group 
N1 N 0.2886(5) 0.7086(3) 0.2214(3) 0.0386(11) Uani 1 1 d . . . 
C12 C 0.3966(5) 0.9179(4) 0.2857(3) 0.0289(11) Uani 1 1 d . . . 
H12 H 0.4310 0.9884 0.3062 0.035 Uiso 1 1 calc R . . 
C10 C 0.2194(6) 0.7573(4) 0.2815(3) 0.0336(12) Uani 1 1 d . . . 
H10 H 0.1327 0.7187 0.3011 0.040 Uiso 1 1 calc R . . 
C13 C 0.1771(5) 0.9091(4) 0.3819(3) 0.0262(11) Uani 1 1 d . . . 
C11 C 0.2678(5) 0.8608(3) 0.3163(3) 0.0242(10) Uani 1 1 d . . . 
O4 O 0.0657(4) 0.8499(2) 0.4076(2) 0.0331(8) Uani 1 1 d . . . 
O3 O 0.2205(4) 1.0053(2) 0.4063(2) 0.0352(8) Uani 1 1 d . . . 
Pr1 Pr 0.87299(3) 0.85932(2) 0.513832(19) 0.02178(8) Uani 1 1 d . . . 
O6 O 0.8335(4) 0.7895(3) 0.6677(2) 0.0350(8) Uani 1 1 d . . . 
N4 N 0.7665(4) 0.6674(3) 0.4241(3) 0.0307(9) Uani 1 1 d . . . 
O1 O 0.7194(4) 0.8672(3) 0.3635(2) 0.0373(9) Uani 1 1 d . . . 
O5 O 1.0163(4) 0.7502(3) 0.5974(2) 0.0378(9) Uani 1 1 d . . . 
N3 N 0.5789(4) 0.7667(3) 0.5053(3) 0.0318(10) Uani 1 1 d . . . 
C35 C 0.6156(6) 0.6182(4) 0.4129(3) 0.0321(12) Uani 1 1 d . . . 
O2 O 0.9007(4) 1.0120(3) 0.3993(2) 0.0350(8) Uani 1 1 d . . . 
C31 C 0.5171(5) 0.6699(4) 0.4576(3) 0.0319(12) Uani 1 1 d . . . 
C19 C 0.9309(6) 0.7098(4) 0.8336(4) 0.0340(12) Uani 1 1 d . . . 
H19 H 0.8293 0.7109 0.8261 0.041 Uiso 1 1 calc R . . 
C1 C 0.7915(5) 0.9489(4) 0.3404(3) 0.0262(11) Uani 1 1 d . . . 
C14 C 0.9496(6) 0.7555(4) 0.6687(4) 0.0305(11) Uani 1 1 d . . . 
C2 C 0.7560(5) 0.9684(3) 0.2409(3) 0.0247(10) Uani 1 1 d . . . 
C7 C 0.6106(5) 0.9262(4) 0.1861(3) 0.0277(11) Uani 1 1 d . . . 
C8 C 0.4741(5) 0.8705(4) 0.2251(3) 0.0270(11) Uani 1 1 d . . . 
C30 C 0.3616(6) 0.6186(4) 0.4526(4) 0.0402(13) Uani 1 1 d . . . 
O7 O 0.8297(5) 0.4844(3) 0.8767(3) 0.0671(13) Uani 1 1 d D . . 
H7 H 0.7924 0.4255 0.8429 0.08(2) Uiso 1 1 d RD . . 
C15 C 1.0129(6) 0.7265(4) 0.7597(3) 0.0303(11) Uani 1 1 d . . . 
C3 C 0.8759(6) 1.0167(4) 0.1972(4) 0.0337(12) Uani 1 1 d . . . 
H3 H 0.9717 1.0460 0.2336 0.040 Uiso 1 1 calc R . . 
C38 C 0.8567(6) 0.6186(4) 0.3855(4) 0.0423(14) Uani 1 1 d . . . 
H38 H 0.9605 0.6514 0.3942 0.051 Uiso 1 1 calc R . . 
C9 C 0.4142(6) 0.7661(4) 0.1951(4) 0.0361(12) Uani 1 1 d . . . 
H9 H 0.4645 0.7334 0.1537 0.043 Uiso 1 1 calc R . . 
C27 C 0.4874(6) 0.8133(4) 0.5454(4) 0.0419(14) Uani 1 1 d . . . 
H27 H 0.5286 0.8806 0.5762 0.050 Uiso 1 1 calc R . . 
C34 C 0.5544(7) 0.5179(4) 0.3615(4) 0.0435(14) Uani 1 1 d . . . 
C18 C 0.9988(6) 0.6913(4) 0.9189(3) 0.0355(12) Uani 1 1 d . . . 
C20 C 0.9165(6) 0.6797(4) 1.0031(3) 0.0382(13) Uani 1 1 d . . . 
C24 C 0.7237(7) 0.5969(5) 1.0892(4) 0.0559(16) Uani 1 1 d . . . 
H24 H 0.6441 0.5407 1.0935 0.067 Uiso 1 1 calc R . . 
C16 C 1.1632(6) 0.7233(4) 0.7740(4) 0.0418(13) Uani 1 1 d . . . 
H16 H 1.2189 0.7334 0.7240 0.050 Uiso 1 1 calc R . . 
N2 N 1.2327(5) 0.7065(4) 0.8550(4) 0.0557(14) Uani 1 1 d . . . 
C5 C 0.7154(7) 0.9798(5) 0.0469(4) 0.0540(16) Uani 1 1 d . . . 
H5 H 0.7015 0.9820 -0.0182 0.065 Uiso 1 1 calc R . . 
C25 C 0.7977(6) 0.5965(4) 1.0092(4) 0.0410(13) Uani 1 1 d . . . 
C4 C 0.8556(7) 1.0221(4) 0.1008(4) 0.0462(15) Uani 1 1 d . . . 
H4 H 0.9373 1.0545 0.0727 0.055 Uiso 1 1 calc R . . 
C6 C 0.5930(6) 0.9332(4) 0.0901(4) 0.0459(14) Uani 1 1 d . . . 
H6 H 0.4970 0.9062 0.0533 0.055 Uiso 1 1 calc R . . 
O8 O 0.6285(6) 0.4338(4) 0.9457(5) 0.122(2) Uani 1 1 d . . . 
C29 C 0.2726(6) 0.6716(5) 0.4991(4) 0.0494(16) Uani 1 1 d . . . 
H29 H 0.1700 0.6395 0.4986 0.059 Uiso 1 1 calc R . . 
C17 C 1.1503(7) 0.6906(5) 0.9251(4) 0.0527(16) Uani 1 1 d . . . 
H17 H 1.1976 0.6783 0.9819 0.063 Uiso 1 1 calc R . . 
C26 C 0.7420(8) 0.5001(5) 0.9370(5) 0.0623(18) Uani 1 1 d . . . 
C28 C 0.3330(6) 0.7684(5) 0.5448(4) 0.0473(15) Uani 1 1 d . . . 
H28 H 0.2734 0.8042 0.5751 0.057 Uiso 1 1 calc R . . 
C21 C 0.9595(7) 0.7600(4) 1.0768(4) 0.0506(15) Uani 1 1 d . . . 
H21 H 1.0393 0.8165 1.0734 0.061 Uiso 1 1 calc R . . 
C37 C 0.8050(8) 0.5200(4) 0.3322(4) 0.0550(16) Uani 1 1 d . . . 
H37 H 0.8728 0.4890 0.3052 0.066 Uiso 1 1 calc R . . 
C32 C 0.3050(7) 0.5173(5) 0.4008(5) 0.0588(18) Uani 1 1 d . . . 
H32 H 0.2023 0.4834 0.3971 0.071 Uiso 1 1 calc R . . 
C33 C 0.3944(7) 0.4691(5) 0.3573(5) 0.0596(18) Uani 1 1 d . . . 
H33 H 0.3526 0.4030 0.3237 0.071 Uiso 1 1 calc R . . 
C22 C 0.8877(8) 0.7597(5) 1.1563(4) 0.0564(17) Uani 1 1 d . . . 
H22 H 0.9218 0.8144 1.2066 0.068 Uiso 1 1 calc R . . 
C23 C 0.7673(8) 0.6795(6) 1.1614(4) 0.0596(18) Uani 1 1 d . . . 
H23 H 0.7150 0.6807 1.2134 0.071 Uiso 1 1 calc R . . 
C36 C 0.6544(8) 0.4705(5) 0.3203(4) 0.0579(17) Uani 1 1 d . . . 
H36 H 0.6178 0.4050 0.2848 0.069 Uiso 1 1 calc R . . 
O9 O 0.5451(5) 0.7047(5) 0.8919(4) 0.0952(17) Uani 1 1 d D . . 
H1W H 0.4524 0.7055 0.8805 0.114 Uiso 1 1 d R . . 
H2W H 0.5417 0.6668 0.9343 0.19(6) Uiso 1 1 d RD . . 
O10 O 0.6590(10) 0.8763(6) 0.7976(5) 0.187(4) Uani 1 1 d . . . 
H3W H 0.7104 0.8519 0.7597 0.225 Uiso 1 1 d R . . 
H4W H 0.6246 0.8262 0.8260 0.225 Uiso 1 1 d R . . 
 
loop_ 
 _atom_site_aniso_label 
 _atom_site_aniso_U_11 
 _atom_site_aniso_U_22 
 _atom_site_aniso_U_33 
 _atom_site_aniso_U_23 
 _atom_site_aniso_U_13 
 _atom_site_aniso_U_12 
N1 0.037(3) 0.030(2) 0.048(3) -0.005(2) 0.016(2) 0.007(2) 
C12 0.025(3) 0.028(3) 0.029(3) -0.003(2) 0.002(2) 0.004(2) 
C10 0.032(3) 0.028(3) 0.039(3) 0.001(2) 0.008(2) 0.007(2) 
C13 0.018(3) 0.029(3) 0.029(3) -0.003(2) 0.004(2) 0.005(2) 
C11 0.021(2) 0.024(3) 0.025(2) -0.002(2) 0.003(2) 0.005(2) 
O4 0.0287(19) 0.0299(19) 0.038(2) -0.0016(15) 0.0143(16) 0.0023(16) 
O3 0.030(2) 0.027(2) 0.046(2) -0.0043(16) 0.0167(16) 0.0034(16) 
Pr1 0.01719(14) 0.02237(14) 0.02351(14) 0.00096(10) 0.00405(10) 0.00225(10) 
O6 0.029(2) 0.045(2) 0.035(2) 0.0118(16) 0.0082(16) 0.0126(17) 
N4 0.030(2) 0.024(2) 0.035(2) 0.0005(18) 0.0076(19) 0.0041(19) 
O1 0.0291(19) 0.038(2) 0.0332(19) 0.0098(16) -0.0063(15) -0.0094(17) 
O5 0.034(2) 0.052(2) 0.033(2) 0.0101(17) 0.0120(16) 0.0185(18) 
N3 0.024(2) 0.035(2) 0.034(2) 0.0052(19) 0.0055(18) 0.0028(19) 
C35 0.035(3) 0.024(3) 0.032(3) 0.008(2) -0.001(2) 0.001(2) 
O2 0.0259(19) 0.039(2) 0.0329(19) -0.0032(16) 0.0012(15) 0.0013(16) 
C31 0.027(3) 0.028(3) 0.035(3) 0.010(2) -0.003(2) -0.001(2) 
C19 0.030(3) 0.028(3) 0.041(3) 0.002(2) 0.004(2) 0.006(2) 
C1 0.015(2) 0.034(3) 0.029(3) 0.000(2) 0.005(2) 0.006(2) 
C14 0.027(3) 0.025(3) 0.036(3) 0.004(2) 0.003(2) 0.002(2) 
C2 0.026(3) 0.023(3) 0.027(3) 0.001(2) 0.009(2) 0.008(2) 
C7 0.028(3) 0.032(3) 0.026(3) 0.002(2) 0.008(2) 0.013(2) 
C8 0.019(2) 0.036(3) 0.025(3) 0.002(2) 0.000(2) 0.008(2) 
C30 0.027(3) 0.036(3) 0.046(3) 0.011(3) -0.008(2) -0.006(3) 
O7 0.089(3) 0.038(3) 0.067(3) -0.009(2) 0.037(3) 0.001(2) 
C15 0.031(3) 0.023(3) 0.037(3) 0.003(2) 0.004(2) 0.009(2) 
C3 0.026(3) 0.030(3) 0.039(3) -0.001(2) 0.009(2) -0.001(2) 
C38 0.042(3) 0.031(3) 0.052(4) 0.005(3) 0.005(3) 0.009(3) 
C9 0.034(3) 0.039(3) 0.037(3) -0.002(2) 0.010(2) 0.014(3) 
C27 0.030(3) 0.048(4) 0.046(3) 0.000(3) 0.012(3) 0.008(3) 
C34 0.051(4) 0.027(3) 0.042(3) 0.005(2) -0.004(3) -0.002(3) 
C18 0.048(3) 0.029(3) 0.032(3) 0.007(2) 0.003(2) 0.015(3) 
C20 0.051(4) 0.039(3) 0.029(3) 0.007(2) -0.002(2) 0.021(3) 
C24 0.054(4) 0.064(4) 0.054(4) 0.009(3) 0.015(3) 0.020(3) 
C16 0.046(3) 0.051(4) 0.035(3) 0.012(3) 0.009(3) 0.021(3) 
N2 0.048(3) 0.079(4) 0.052(3) 0.021(3) 0.010(3) 0.034(3) 
C5 0.062(4) 0.071(4) 0.031(3) 0.012(3) 0.011(3) 0.018(4) 
C25 0.046(3) 0.042(3) 0.039(3) 0.004(3) 0.006(3) 0.021(3) 
C4 0.057(4) 0.039(3) 0.041(3) 0.007(3) 0.027(3) 0.001(3) 
C6 0.038(3) 0.069(4) 0.030(3) 0.008(3) 0.003(2) 0.015(3) 
O8 0.074(4) 0.098(4) 0.160(6) -0.058(4) 0.046(4) -0.010(3) 
C29 0.021(3) 0.062(4) 0.064(4) 0.026(3) 0.007(3) 0.002(3) 
C17 0.049(4) 0.071(4) 0.046(4) 0.019(3) 0.001(3) 0.028(3) 
C26 0.045(4) 0.054(4) 0.079(5) -0.013(4) 0.018(4) 0.004(3) 
C28 0.030(3) 0.064(4) 0.052(4) 0.014(3) 0.014(3) 0.015(3) 
C21 0.070(4) 0.043(4) 0.042(3) 0.008(3) 0.009(3) 0.023(3) 
C37 0.069(5) 0.033(3) 0.064(4) -0.002(3) 0.018(3) 0.017(3) 
C32 0.035(4) 0.048(4) 0.078(5) 0.016(3) -0.001(3) -0.013(3) 
C33 0.050(4) 0.038(4) 0.066(4) -0.001(3) -0.015(3) -0.017(3) 
C22 0.076(5) 0.061(4) 0.035(3) -0.010(3) -0.001(3) 0.035(4) 
C23 0.066(5) 0.089(5) 0.038(4) 0.010(4) 0.014(3) 0.045(4) 
C36 0.076(5) 0.032(3) 0.054(4) -0.008(3) -0.003(4) 0.008(3) 
O9 0.061(3) 0.127(5) 0.104(4) 0.027(4) 0.010(3) 0.035(3) 
O10 0.315(11) 0.194(8) 0.171(7) 0.110(6) 0.172(7) 0.184(8) 
 
_geom_special_details 
; 
 All esds (except the esd in the dihedral angle between two l.s. planes) 
 are estimated using the full covariance matrix.  The cell esds are taken 
 into account individually in the estimation of esds in distances, angles 
 and torsion angles; correlations between esds in cell parameters are only 
 used when they are defined by crystal symmetry.  An approximate (isotropic) 
 treatment of cell esds is used for estimating esds involving l.s. planes. 
; 
 
loop_ 
 _geom_bond_atom_site_label_1 
 _geom_bond_atom_site_label_2 
 _geom_bond_distance 
 _geom_bond_site_symmetry_2 
 _geom_bond_publ_flag 
N1 C10 1.335(6) . ? 
N1 C9 1.342(6) . ? 
C12 C8 1.384(6) . ? 
C12 C11 1.391(6) . ? 
C12 H12 0.9300 . ? 
C10 C11 1.378(6) . ? 
C10 H10 0.9300 . ? 
C13 O4 1.255(5) . ? 
C13 O3 1.262(5) . ? 
C13 C11 1.521(6) . ? 
O4 Pr1 2.479(3) 1_455 ? 
O3 Pr1 2.442(3) 2_676 ? 
Pr1 O2 2.436(3) 2_776 ? 
Pr1 O3 2.442(3) 2_676 ? 
Pr1 O1 2.456(3) . ? 
Pr1 O4 2.479(3) 1_655 ? 
Pr1 O6 2.532(3) . ? 
Pr1 O5 2.540(3) . ? 
Pr1 N4 2.652(4) . ? 
Pr1 N3 2.653(4) . ? 
Pr1 O2 2.789(3) . ? 
Pr1 Pr1 4.0492(17) 2_776 ? 
O6 C14 1.265(5) . ? 
N4 C38 1.315(6) . ? 
N4 C35 1.357(6) . ? 
O1 C1 1.249(5) . ? 
O5 C14 1.253(6) . ? 
N3 C27 1.316(6) . ? 
N3 C31 1.355(6) . ? 
C35 C34 1.411(7) . ? 
C35 C31 1.438(7) . ? 
O2 C1 1.279(5) . ? 
O2 Pr1 2.436(3) 2_776 ? 
C31 C30 1.409(7) . ? 
C19 C15 1.376(7) . ? 
C19 C18 1.385(7) . ? 
C19 H19 0.9300 . ? 
C1 C2 1.493(6) . ? 
C14 C15 1.500(7) . ? 
C2 C3 1.389(6) . ? 
C2 C7 1.406(6) . ? 
C7 C6 1.381(7) . ? 
C7 C8 1.498(6) . ? 
C8 C9 1.383(6) . ? 
C30 C29 1.393(8) . ? 
C30 C32 1.421(8) . ? 
O7 C26 1.281(7) . ? 
O7 H7 0.8494 . ? 
C15 C16 1.382(7) . ? 
C3 C4 1.383(7) . ? 
C3 H3 0.9300 . ? 
C38 C37 1.397(7) . ? 
C38 H38 0.9300 . ? 
C9 H9 0.9300 . ? 
C27 C28 1.391(7) . ? 
C27 H27 0.9300 . ? 
C34 C36 1.393(8) . ? 
C34 C33 1.440(8) . ? 
C18 C17 1.384(7) . ? 
C18 C20 1.498(7) . ? 
C20 C21 1.364(7) . ? 
C20 C25 1.379(7) . ? 
C24 C23 1.372(8) . ? 
C24 C25 1.397(7) . ? 
C24 H24 0.9300 . ? 
C16 N2 1.329(6) . ? 
C16 H16 0.9300 . ? 
N2 C17 1.331(7) . ? 
C5 C4 1.363(8) . ? 
C5 C6 1.395(7) . ? 
C5 H5 0.9300 . ? 
C25 C26 1.501(8) . ? 
C4 H4 0.9300 . ? 
C6 H6 0.9300 . ? 
O8 C26 1.224(7) . ? 
C29 C28 1.345(8) . ? 
C29 H29 0.9300 . ? 
C17 H17 0.9300 . ? 
C28 H28 0.9300 . ? 
C21 C22 1.378(8) . ? 
C21 H21 0.9300 . ? 
C37 C36 1.355(8) . ? 
C37 H37 0.9300 . ? 
C32 C33 1.335(8) . ? 
C32 H32 0.9300 . ? 
C33 H33 0.9300 . ? 
C22 C23 1.360(9) . ? 
C22 H22 0.9300 . ? 
C23 H23 0.9300 . ? 
C36 H36 0.9300 . ? 
O9 H1W 0.8499 . ? 
O9 H2W 0.8434 . ? 
O10 H3W 0.8500 . ? 
O10 H4W 0.8498 . ? 
 
loop_ 
 _geom_angle_atom_site_label_1 
 _geom_angle_atom_site_label_2 
 _geom_angle_atom_site_label_3 
 _geom_angle 
 _geom_angle_site_symmetry_1 
 _geom_angle_site_symmetry_3 
 _geom_angle_publ_flag 
C10 N1 C9 116.5(4) . . ? 
C8 C12 C11 120.4(4) . . ? 
C8 C12 H12 119.8 . . ? 
C11 C12 H12 119.8 . . ? 
N1 C10 C11 124.4(5) . . ? 
N1 C10 H10 117.8 . . ? 
C11 C10 H10 117.8 . . ? 
O4 C13 O3 125.5(4) . . ? 
O4 C13 C11 117.2(4) . . ? 
O3 C13 C11 117.3(4) . . ? 
C10 C11 C12 117.3(4) . . ? 
C10 C11 C13 120.0(4) . . ? 
C12 C11 C13 122.6(4) . . ? 
C13 O4 Pr1 138.6(3) . 1_455 ? 
C13 O3 Pr1 138.2(3) . 2_676 ? 
O2 Pr1 O3 74.38(11) 2_776 2_676 ? 
O2 Pr1 O1 127.52(11) 2_776 . ? 
O3 Pr1 O1 89.09(12) 2_676 . ? 
O2 Pr1 O4 77.55(11) 2_776 1_655 ? 
O3 Pr1 O4 136.17(11) 2_676 1_655 ? 
O1 Pr1 O4 82.03(12) . 1_655 ? 
O2 Pr1 O6 88.63(11) 2_776 . ? 
O3 Pr1 O6 81.46(11) 2_676 . ? 
O1 Pr1 O6 138.52(11) . . ? 
O4 Pr1 O6 130.88(11) 1_655 . ? 
O2 Pr1 O5 78.09(12) 2_776 . ? 
O3 Pr1 O5 125.28(12) 2_676 . ? 
O1 Pr1 O5 143.81(11) . . ? 
O4 Pr1 O5 79.59(11) 1_655 . ? 
O6 Pr1 O5 51.35(10) . . ? 
O2 Pr1 N4 144.56(12) 2_776 . ? 
O3 Pr1 N4 139.33(12) 2_676 . ? 
O1 Pr1 N4 74.04(12) . . ? 
O4 Pr1 N4 78.77(11) 1_655 . ? 
O6 Pr1 N4 87.27(12) . . ? 
O5 Pr1 N4 71.97(12) . . ? 
O2 Pr1 N3 147.56(12) 2_776 . ? 
O3 Pr1 N3 77.65(12) 2_676 . ? 
O1 Pr1 N3 67.39(11) . . ? 
O4 Pr1 N3 134.85(12) 1_655 . ? 
O6 Pr1 N3 71.13(11) . . ? 
O5 Pr1 N3 105.85(12) . . ? 
N4 Pr1 N3 61.74(12) . . ? 
O2 Pr1 O2 78.59(11) 2_776 . ? 
O3 Pr1 O2 73.05(11) 2_676 . ? 
O1 Pr1 O2 48.94(10) . . ? 
O4 Pr1 O2 68.86(10) 1_655 . ? 
O6 Pr1 O2 153.72(10) . . ? 
O5 Pr1 O2 144.01(10) . . ? 
N4 Pr1 O2 116.31(11) . . ? 
N3 Pr1 O2 108.57(11) . . ? 
O2 Pr1 Pr1 42.46(8) 2_776 2_776 ? 
O3 Pr1 Pr1 68.73(8) 2_676 2_776 ? 
O1 Pr1 Pr1 85.07(8) . 2_776 ? 
O4 Pr1 Pr1 67.79(8) 1_655 2_776 ? 
O6 Pr1 Pr1 127.09(8) . 2_776 ? 
O5 Pr1 Pr1 115.66(8) . 2_776 ? 
N4 Pr1 Pr1 142.69(9) . 2_776 ? 
N3 Pr1 Pr1 136.63(9) . 2_776 ? 
O2 Pr1 Pr1 36.13(7) . 2_776 ? 
C14 O6 Pr1 92.9(3) . . ? 
C38 N4 C35 118.0(4) . . ? 
C38 N4 Pr1 121.2(3) . . ? 
C35 N4 Pr1 120.8(3) . . ? 
C1 O1 Pr1 103.1(3) . . ? 
C14 O5 Pr1 92.8(3) . . ? 
C27 N3 C31 117.6(4) . . ? 
C27 N3 Pr1 121.5(3) . . ? 
C31 N3 Pr1 120.9(3) . . ? 
N4 C35 C34 122.1(5) . . ? 
N4 C35 C31 118.2(4) . . ? 
C34 C35 C31 119.7(5) . . ? 
C1 O2 Pr1 169.8(3) . 2_776 ? 
C1 O2 Pr1 86.6(3) . . ? 
Pr1 O2 Pr1 101.41(11) 2_776 . ? 
N3 C31 C30 122.1(5) . . ? 
N3 C31 C35 118.2(4) . . ? 
C30 C31 C35 119.7(5) . . ? 
C15 C19 C18 120.4(5) . . ? 
C15 C19 H19 119.8 . . ? 
C18 C19 H19 119.8 . . ? 
O1 C1 O2 120.4(4) . . ? 
O1 C1 C2 119.1(4) . . ? 
O2 C1 C2 120.3(4) . . ? 
O5 C14 O6 121.6(4) . . ? 
O5 C14 C15 119.7(4) . . ? 
O6 C14 C15 118.7(4) . . ? 
C3 C2 C7 119.1(4) . . ? 
C3 C2 C1 118.3(4) . . ? 
C7 C2 C1 121.8(4) . . ? 
C6 C7 C2 118.4(4) . . ? 
C6 C7 C8 117.8(4) . . ? 
C2 C7 C8 123.7(4) . . ? 
C9 C8 C12 116.8(4) . . ? 
C9 C8 C7 119.0(4) . . ? 
C12 C8 C7 124.0(4) . . ? 
C29 C30 C31 117.2(5) . . ? 
C29 C30 C32 124.1(5) . . ? 
C31 C30 C32 118.8(5) . . ? 
C26 O7 H7 110.0 . . ? 
C19 C15 C16 117.6(5) . . ? 
C19 C15 C14 122.7(4) . . ? 
C16 C15 C14 119.5(4) . . ? 
C4 C3 C2 121.4(5) . . ? 
C4 C3 H3 119.3 . . ? 
C2 C3 H3 119.3 . . ? 
N4 C38 C37 123.6(5) . . ? 
N4 C38 H38 118.2 . . ? 
C37 C38 H38 118.2 . . ? 
N1 C9 C8 124.6(5) . . ? 
N1 C9 H9 117.7 . . ? 
C8 C9 H9 117.7 . . ? 
N3 C27 C28 124.3(5) . . ? 
N3 C27 H27 117.9 . . ? 
C28 C27 H27 117.9 . . ? 
C36 C34 C35 117.7(5) . . ? 
C36 C34 C33 123.7(6) . . ? 
C35 C34 C33 118.6(6) . . ? 
C17 C18 C19 116.8(5) . . ? 
C17 C18 C20 121.2(5) . . ? 
C19 C18 C20 121.9(5) . . ? 
C21 C20 C25 118.5(5) . . ? 
C21 C20 C18 116.7(5) . . ? 
C25 C20 C18 124.8(5) . . ? 
C23 C24 C25 120.7(6) . . ? 
C23 C24 H24 119.7 . . ? 
C25 C24 H24 119.7 . . ? 
N2 C16 C15 123.8(5) . . ? 
N2 C16 H16 118.1 . . ? 
C15 C16 H16 118.1 . . ? 
C16 N2 C17 117.1(5) . . ? 
C4 C5 C6 119.6(5) . . ? 
C4 C5 H5 120.2 . . ? 
C6 C5 H5 120.2 . . ? 
C20 C25 C24 119.7(5) . . ? 
C20 C25 C26 125.2(5) . . ? 
C24 C25 C26 115.1(6) . . ? 
C5 C4 C3 119.8(5) . . ? 
C5 C4 H4 120.1 . . ? 
C3 C4 H4 120.1 . . ? 
C7 C6 C5 121.7(5) . . ? 
C7 C6 H6 119.2 . . ? 
C5 C6 H6 119.2 . . ? 
C28 C29 C30 120.9(5) . . ? 
C28 C29 H29 119.6 . . ? 
C30 C29 H29 119.6 . . ? 
N2 C17 C18 124.3(5) . . ? 
N2 C17 H17 117.8 . . ? 
C18 C17 H17 117.8 . . ? 
O8 C26 O7 122.1(6) . . ? 
O8 C26 C25 119.9(6) . . ? 
O7 C26 C25 117.2(6) . . ? 
C29 C28 C27 118.0(5) . . ? 
C29 C28 H28 121.0 . . ? 
C27 C28 H28 121.0 . . ? 
C20 C21 C22 121.8(6) . . ? 
C20 C21 H21 119.1 . . ? 
C22 C21 H21 119.1 . . ? 
C36 C37 C38 118.9(6) . . ? 
C36 C37 H37 120.6 . . ? 
C38 C37 H37 120.6 . . ? 
C33 C32 C30 122.2(6) . . ? 
C33 C32 H32 118.9 . . ? 
C30 C32 H32 118.9 . . ? 
C32 C33 C34 121.1(6) . . ? 
C32 C33 H33 119.5 . . ? 
C34 C33 H33 119.5 . . ? 
C23 C22 C21 120.1(6) . . ? 
C23 C22 H22 120.0 . . ? 
C21 C22 H22 120.0 . . ? 
C22 C23 C24 119.2(6) . . ? 
C22 C23 H23 120.4 . . ? 
C24 C23 H23 120.4 . . ? 
C37 C36 C34 119.9(5) . . ? 
C37 C36 H36 120.1 . . ? 
C34 C36 H36 120.1 . . ? 
H1W O9 H2W 101.4 . . ? 
H3W O10 H4W 102.5 . . ? 
 
loop_ 
 _geom_torsion_atom_site_label_1 
 _geom_torsion_atom_site_label_2 
 _geom_torsion_atom_site_label_3 
 _geom_torsion_atom_site_label_4 
 _geom_torsion 
 _geom_torsion_site_symmetry_1 
 _geom_torsion_site_symmetry_2 
 _geom_torsion_site_symmetry_3 
 _geom_torsion_site_symmetry_4 
 _geom_torsion_publ_flag 
C9 N1 C10 C11 0.6(7) . . . . ? 
N1 C10 C11 C12 0.6(7) . . . . ? 
N1 C10 C11 C13 178.0(4) . . . . ? 
C8 C12 C11 C10 -2.0(7) . . . . ? 
C8 C12 C11 C13 -179.2(4) . . . . ? 
O4 C13 C11 C10 5.2(7) . . . . ? 
O3 C13 C11 C10 -175.1(4) . . . . ? 
O4 C13 C11 C12 -177.7(4) . . . . ? 
O3 C13 C11 C12 2.0(7) . . . . ? 
O3 C13 O4 Pr1 -3.4(8) . . . 1_455 ? 
C11 C13 O4 Pr1 176.2(3) . . . 1_455 ? 
O4 C13 O3 Pr1 -10.9(8) . . . 2_676 ? 
C11 C13 O3 Pr1 169.4(3) . . . 2_676 ? 
O2 Pr1 O6 C14 -69.3(3) 2_776 . . . ? 
O3 Pr1 O6 C14 -143.7(3) 2_676 . . . ? 
O1 Pr1 O6 C14 137.5(3) . . . . ? 
O4 Pr1 O6 C14 2.9(3) 1_655 . . . ? 
O5 Pr1 O6 C14 6.5(3) . . . . ? 
N4 Pr1 O6 C14 75.5(3) . . . . ? 
N3 Pr1 O6 C14 136.5(3) . . . . ? 
O2 Pr1 O6 C14 -129.6(3) . . . . ? 
Pr1 Pr1 O6 C14 -88.7(3) 2_776 . . . ? 
O2 Pr1 N4 C38 -25.5(5) 2_776 . . . ? 
O3 Pr1 N4 C38 177.2(3) 2_676 . . . ? 
O1 Pr1 N4 C38 108.2(4) . . . . ? 
O4 Pr1 N4 C38 23.4(4) 1_655 . . . ? 
O6 Pr1 N4 C38 -109.3(4) . . . . ? 
O5 Pr1 N4 C38 -59.2(4) . . . . ? 
N3 Pr1 N4 C38 -179.3(4) . . . . ? 
O2 Pr1 N4 C38 82.8(4) . . . . ? 
Pr1 Pr1 N4 C38 49.7(4) 2_776 . . . ? 
O2 Pr1 N4 C35 157.5(3) 2_776 . . . ? 
O3 Pr1 N4 C35 0.2(4) 2_676 . . . ? 
O1 Pr1 N4 C35 -68.9(3) . . . . ? 
O4 Pr1 N4 C35 -153.7(4) 1_655 . . . ? 
O6 Pr1 N4 C35 73.7(3) . . . . ? 
O5 Pr1 N4 C35 123.7(4) . . . . ? 
N3 Pr1 N4 C35 3.7(3) . . . . ? 
O2 Pr1 N4 C35 -94.2(3) . . . . ? 
Pr1 Pr1 N4 C35 -127.3(3) 2_776 . . . ? 
O2 Pr1 O1 C1 4.3(3) 2_776 . . . ? 
O3 Pr1 O1 C1 73.7(3) 2_676 . . . ? 
O4 Pr1 O1 C1 -63.2(3) 1_655 . . . ? 
O6 Pr1 O1 C1 149.7(3) . . . . ? 
O5 Pr1 O1 C1 -123.2(3) . . . . ? 
N4 Pr1 O1 C1 -143.8(3) . . . . ? 
N3 Pr1 O1 C1 150.7(3) . . . . ? 
O2 Pr1 O1 C1 5.6(3) . . . . ? 
Pr1 Pr1 O1 C1 5.0(3) 2_776 . . . ? 
O2 Pr1 O5 C14 91.3(3) 2_776 . . . ? 
O3 Pr1 O5 C14 30.4(3) 2_676 . . . ? 
O1 Pr1 O5 C14 -128.7(3) . . . . ? 
O4 Pr1 O5 C14 170.6(3) 1_655 . . . ? 
O6 Pr1 O5 C14 -6.6(3) . . . . ? 
N4 Pr1 O5 C14 -107.9(3) . . . . ? 
N3 Pr1 O5 C14 -55.5(3) . . . . ? 
O2 Pr1 O5 C14 141.9(3) . . . . ? 
Pr1 Pr1 O5 C14 111.6(3) 2_776 . . . ? 
O2 Pr1 N3 C27 27.6(5) 2_776 . . . ? 
O3 Pr1 N3 C27 -3.3(4) 2_676 . . . ? 
O1 Pr1 N3 C27 -97.5(4) . . . . ? 
O4 Pr1 N3 C27 -148.8(3) 1_655 . . . ? 
O6 Pr1 N3 C27 81.8(4) . . . . ? 
O5 Pr1 N3 C27 120.2(4) . . . . ? 
N4 Pr1 N3 C27 179.0(4) . . . . ? 
O2 Pr1 N3 C27 -70.5(4) . . . . ? 
Pr1 Pr1 N3 C27 -42.7(4) 2_776 . . . ? 
O2 Pr1 N3 C31 -153.7(3) 2_776 . . . ? 
O3 Pr1 N3 C31 175.4(4) 2_676 . . . ? 
O1 Pr1 N3 C31 81.2(3) . . . . ? 
O4 Pr1 N3 C31 30.0(4) 1_655 . . . ? 
O6 Pr1 N3 C31 -99.5(3) . . . . ? 
O5 Pr1 N3 C31 -61.0(4) . . . . ? 
N4 Pr1 N3 C31 -2.2(3) . . . . ? 
O2 Pr1 N3 C31 108.3(3) . . . . ? 
Pr1 Pr1 N3 C31 136.0(3) 2_776 . . . ? 
C38 N4 C35 C34 -0.2(7) . . . . ? 
Pr1 N4 C35 C34 176.9(4) . . . . ? 
C38 N4 C35 C31 178.0(4) . . . . ? 
Pr1 N4 C35 C31 -4.9(6) . . . . ? 
O2 Pr1 O2 C1 173.6(3) 2_776 . . . ? 
O3 Pr1 O2 C1 -109.4(3) 2_676 . . . ? 
O1 Pr1 O2 C1 -5.3(2) . . . . ? 
O4 Pr1 O2 C1 92.7(3) 1_655 . . . ? 
O6 Pr1 O2 C1 -124.0(3) . . . . ? 
O5 Pr1 O2 C1 123.1(3) . . . . ? 
N4 Pr1 O2 C1 27.8(3) . . . . ? 
N3 Pr1 O2 C1 -39.2(3) . . . . ? 
Pr1 Pr1 O2 C1 173.6(3) 2_776 . . . ? 
O2 Pr1 O2 Pr1 0.0 2_776 . . 2_776 ? 
O3 Pr1 O2 Pr1 76.96(12) 2_676 . . 2_776 ? 
O1 Pr1 O2 Pr1 -178.96(19) . . . 2_776 ? 
O4 Pr1 O2 Pr1 -80.93(12) 1_655 . . 2_776 ? 
O6 Pr1 O2 Pr1 62.3(3) . . . 2_776 ? 
O5 Pr1 O2 Pr1 -50.5(2) . . . 2_776 ? 
N4 Pr1 O2 Pr1 -145.83(12) . . . 2_776 ? 
N3 Pr1 O2 Pr1 147.18(12) . . . 2_776 ? 
C27 N3 C31 C30 -1.7(7) . . . . ? 
Pr1 N3 C31 C30 179.5(3) . . . . ? 
C27 N3 C31 C35 179.6(4) . . . . ? 
Pr1 N3 C31 C35 0.8(6) . . . . ? 
N4 C35 C31 N3 2.7(7) . . . . ? 
C34 C35 C31 N3 -179.1(4) . . . . ? 
N4 C35 C31 C30 -176.0(4) . . . . ? 
C34 C35 C31 C30 2.2(7) . . . . ? 
Pr1 O1 C1 O2 -10.7(5) . . . . ? 
Pr1 O1 C1 C2 165.0(3) . . . . ? 
Pr1 O2 C1 O1 151.2(15) 2_776 . . . ? 
Pr1 O2 C1 O1 9.2(4) . . . . ? 
Pr1 O2 C1 C2 -24(2) 2_776 . . . ? 
Pr1 O2 C1 C2 -166.5(4) . . . . ? 
Pr1 O5 C14 O6 12.1(5) . . . . ? 
Pr1 O5 C14 C15 -164.4(4) . . . . ? 
Pr1 O6 C14 O5 -12.2(5) . . . . ? 
Pr1 O6 C14 C15 164.4(4) . . . . ? 
O1 C1 C2 C3 -142.1(5) . . . . ? 
O2 C1 C2 C3 33.7(6) . . . . ? 
O1 C1 C2 C7 28.2(7) . . . . ? 
O2 C1 C2 C7 -156.1(4) . . . . ? 
C3 C2 C7 C6 0.9(7) . . . . ? 
C1 C2 C7 C6 -169.3(5) . . . . ? 
C3 C2 C7 C8 178.6(4) . . . . ? 
C1 C2 C7 C8 8.4(7) . . . . ? 
C11 C12 C8 C9 2.0(7) . . . . ? 
C11 C12 C8 C7 177.9(4) . . . . ? 
C6 C7 C8 C9 66.4(6) . . . . ? 
C2 C7 C8 C9 -111.4(5) . . . . ? 
C6 C7 C8 C12 -109.5(6) . . . . ? 
C2 C7 C8 C12 72.8(6) . . . . ? 
N3 C31 C30 C29 -0.1(7) . . . . ? 
C35 C31 C30 C29 178.5(5) . . . . ? 
N3 C31 C30 C32 179.7(5) . . . . ? 
C35 C31 C30 C32 -1.7(7) . . . . ? 
C18 C19 C15 C16 0.5(7) . . . . ? 
C18 C19 C15 C14 -174.8(4) . . . . ? 
O5 C14 C15 C19 -166.1(5) . . . . ? 
O6 C14 C15 C19 17.3(7) . . . . ? 
O5 C14 C15 C16 18.7(7) . . . . ? 
O6 C14 C15 C16 -157.9(5) . . . . ? 
C7 C2 C3 C4 -1.4(7) . . . . ? 
C1 C2 C3 C4 169.2(5) . . . . ? 
C35 N4 C38 C37 1.4(8) . . . . ? 
Pr1 N4 C38 C37 -175.7(4) . . . . ? 
C10 N1 C9 C8 -0.6(8) . . . . ? 
C12 C8 C9 N1 -0.7(7) . . . . ? 
C7 C8 C9 N1 -176.9(5) . . . . ? 
C31 N3 C27 C28 2.3(8) . . . . ? 
Pr1 N3 C27 C28 -178.9(4) . . . . ? 
N4 C35 C34 C36 -1.2(8) . . . . ? 
C31 C35 C34 C36 -179.3(5) . . . . ? 
N4 C35 C34 C33 176.8(5) . . . . ? 
C31 C35 C34 C33 -1.4(7) . . . . ? 
C15 C19 C18 C17 0.0(7) . . . . ? 
C15 C19 C18 C20 175.8(5) . . . . ? 
C17 C18 C20 C21 70.0(7) . . . . ? 
C19 C18 C20 C21 -105.7(6) . . . . ? 
C17 C18 C20 C25 -113.0(6) . . . . ? 
C19 C18 C20 C25 71.3(7) . . . . ? 
C19 C15 C16 N2 -1.0(8) . . . . ? 
C14 C15 C16 N2 174.5(5) . . . . ? 
C15 C16 N2 C17 1.0(9) . . . . ? 
C21 C20 C25 C24 0.7(8) . . . . ? 
C18 C20 C25 C24 -176.2(5) . . . . ? 
C21 C20 C25 C26 -176.6(5) . . . . ? 
C18 C20 C25 C26 6.4(9) . . . . ? 
C23 C24 C25 C20 0.5(9) . . . . ? 
C23 C24 C25 C26 178.1(6) . . . . ? 
C6 C5 C4 C3 1.3(9) . . . . ? 
C2 C3 C4 C5 0.3(8) . . . . ? 
C2 C7 C6 C5 0.7(8) . . . . ? 
C8 C7 C6 C5 -177.2(5) . . . . ? 
C4 C5 C6 C7 -1.8(9) . . . . ? 
C31 C30 C29 C28 1.5(8) . . . . ? 
C32 C30 C29 C28 -178.3(5) . . . . ? 
C16 N2 C17 C18 -0.5(9) . . . . ? 
C19 C18 C17 N2 0.0(9) . . . . ? 
C20 C18 C17 N2 -175.9(5) . . . . ? 
C20 C25 C26 O8 -174.7(7) . . . . ? 
C24 C25 C26 O8 7.8(10) . . . . ? 
C20 C25 C26 O7 15.6(9) . . . . ? 
C24 C25 C26 O7 -161.9(6) . . . . ? 
C30 C29 C28 C27 -1.0(8) . . . . ? 
N3 C27 C28 C29 -1.0(9) . . . . ? 
C25 C20 C21 C22 0.2(8) . . . . ? 
C18 C20 C21 C22 177.4(5) . . . . ? 
N4 C38 C37 C36 -1.2(9) . . . . ? 
C29 C30 C32 C33 -179.9(6) . . . . ? 
C31 C30 C32 C33 0.3(9) . . . . ? 
C30 C32 C33 C34 0.5(10) . . . . ? 
C36 C34 C33 C32 177.8(6) . . . . ? 
C35 C34 C33 C32 0.0(9) . . . . ? 
C20 C21 C22 C23 -2.3(9) . . . . ? 
C21 C22 C23 C24 3.5(9) . . . . ? 
C25 C24 C23 C22 -2.6(9) . . . . ? 
C38 C37 C36 C34 -0.3(9) . . . . ? 
C35 C34 C36 C37 1.4(9) . . . . ? 
C33 C34 C36 C37 -176.4(6) . . . . ? 
 
loop_ 
 _geom_hbond_atom_site_label_D 
 _geom_hbond_atom_site_label_H 
 _geom_hbond_atom_site_label_A 
 _geom_hbond_distance_DH 
 _geom_hbond_distance_HA 
 _geom_hbond_distance_DA 
 _geom_hbond_angle_DHA 
 _geom_hbond_site_symmetry_A 
O9 H1W N2  0.85 2.01 2.858(7) 179.3 1_455 
O7 H7 N1  0.85 1.86 2.712(6) 175.0 2_666 
 
_diffrn_measured_fraction_theta_max    0.985 
_diffrn_reflns_theta_full              25.50 
_diffrn_measured_fraction_theta_full   0.985 
_refine_diff_density_max    1.041 
_refine_diff_density_min   -0.739 
_refine_diff_density_rms    0.111 

#===END
 
data_p-1 (Compound 10)
 
_audit_creation_method            SHELXL-97 
_chemical_name_systematic 
; 
 ? 
; 
_chemical_name_common             ? 
_chemical_melting_point           ? 
_chemical_formula_moiety          ? 
_chemical_formula_sum 
 'C38 H27 N4 Nd O10' 
_chemical_formula_weight          843.88 
 
loop_ 
 _atom_type_symbol 
 _atom_type_description 
 _atom_type_scat_dispersion_real 
 _atom_type_scat_dispersion_imag 
 _atom_type_scat_source 
 'C'  'C'   0.0033   0.0016 
 'International Tables Vol C Tables 4.2.6.8 and 6.1.1.4' 
 'H'  'H'   0.0000   0.0000 
 'International Tables Vol C Tables 4.2.6.8 and 6.1.1.4' 
 'N'  'N'   0.0061   0.0033 
 'International Tables Vol C Tables 4.2.6.8 and 6.1.1.4' 
 'Nd'  'Nd'  -0.1943   3.0179 
 'International Tables Vol C Tables 4.2.6.8 and 6.1.1.4' 
 'O'  'O'   0.0106   0.0060 
 'International Tables Vol C Tables 4.2.6.8 and 6.1.1.4' 
 
_symmetry_cell_setting            Triclinic
_symmetry_space_group_name_H-M    P-1
 
loop_ 
 _symmetry_equiv_pos_as_xyz 
 'x, y, z' 
 '-x, -y, -z' 
 
_cell_length_a                    9.073(16) 
_cell_length_b                    13.54(2) 
_cell_length_c                    14.06(2) 
_cell_angle_alpha                 97.219(16) 
_cell_angle_beta                  96.430(18) 
_cell_angle_gamma                 104.87(2) 
_cell_volume                      1637(4) 
_cell_formula_units_Z             2 
_cell_measurement_temperature     293(2) 
_cell_measurement_reflns_used     ? 
_cell_measurement_theta_min       ? 
_cell_measurement_theta_max       ? 
 
_exptl_crystal_description        block
_exptl_crystal_colour             purple
_exptl_crystal_size_max           0.28 
_exptl_crystal_size_mid           0.26 
_exptl_crystal_size_min           0.24 
_exptl_crystal_density_meas       ? 
_exptl_crystal_density_diffrn     1.712 
_exptl_crystal_density_method     'not measured' 
_exptl_crystal_F_000              846 
_exptl_absorpt_coefficient_mu     1.656 
_exptl_absorpt_correction_type    multi-scan 
_exptl_absorpt_correction_T_min   0.6542 
_exptl_absorpt_correction_T_max   0.6920 
_exptl_absorpt_process_details    ? 
 
_exptl_special_details 
; 
 ? 
; 
 
_diffrn_ambient_temperature       293(2) 
_diffrn_radiation_wavelength      0.71073 
_diffrn_radiation_type            MoK\a 
_diffrn_radiation_source          'fine-focus sealed tube' 
_diffrn_radiation_monochromator   graphite 
_diffrn_measurement_device_type   'Bruker APEX-II CCD' 
_diffrn_measurement_method        '\f and \w scans'
_diffrn_detector_area_resol_mean  ? 
_diffrn_reflns_number             10081 
_diffrn_reflns_av_R_equivalents   0.0638 
_diffrn_reflns_av_sigmaI/netI     0.1286 
_diffrn_reflns_limit_h_min        -10 
_diffrn_reflns_limit_h_max        10 
_diffrn_reflns_limit_k_min        -16 
_diffrn_reflns_limit_k_max        14 
_diffrn_reflns_limit_l_min        -15 
_diffrn_reflns_limit_l_max        17 
_diffrn_reflns_theta_min          2.33 
_diffrn_reflns_theta_max          25.50 
_reflns_number_total              5950 
_reflns_number_gt                 4183 
_reflns_threshold_expression      >2sigma(I) 
 
_computing_data_collection        'Bruker APEX2' 
_computing_cell_refinement        'Bruker SAINT' 
_computing_data_reduction         'Bruker SAINT' 
_computing_structure_solution     'SHELXS-97 (Sheldrick, 2008)' 
_computing_structure_refinement   'SHELXL-97 (Sheldrick, 2008)' 
_computing_molecular_graphics     'Bruker SHELXTL'  
_computing_publication_material   'Bruker SHELXTL'  
 
_refine_special_details 
; 
 Refinement of F^2^ against ALL reflections.  The weighted R-factor wR and 
 goodness of fit S are based on F^2^, conventional R-factors R are based 
 on F, with F set to zero for negative F^2^. The threshold expression of 
 F^2^ > 2sigma(F^2^) is used only for calculating R-factors(gt) etc. and is 
 not relevant to the choice of reflections for refinement.  R-factors based 
 on F^2^ are statistically about twice as large as those based on F, and R- 
 factors based on ALL data will be even larger. 
; 
 
_refine_ls_structure_factor_coef  Fsqd  
_refine_ls_matrix_type            full 
_refine_ls_weighting_scheme       calc  
_refine_ls_weighting_details 
 'calc w=1/[\s^2^(Fo^2^)+(0.0100P)^2^+0.0000P] where P=(Fo^2^+2Fc^2^)/3' 
_atom_sites_solution_primary      direct 
_atom_sites_solution_secondary    difmap 
_atom_sites_solution_hydrogens    geom 
_refine_ls_hydrogen_treatment     constr 
_refine_ls_extinction_method      none 
_refine_ls_extinction_coef        ? 
_refine_ls_number_reflns          5950 
_refine_ls_number_parameters      480 
_refine_ls_number_restraints      2 
_refine_ls_R_factor_all           0.0796 
_refine_ls_R_factor_gt            0.0497 
_refine_ls_wR_factor_ref          0.0795 
_refine_ls_wR_factor_gt           0.0735 
_refine_ls_goodness_of_fit_ref    0.991 
_refine_ls_restrained_S_all       0.991 
_refine_ls_shift/su_max           0.001 
_refine_ls_shift/su_mean          0.000 
 
loop_ 
 _atom_site_label 
 _atom_site_type_symbol 
 _atom_site_fract_x 
 _atom_site_fract_y 
 _atom_site_fract_z 
 _atom_site_U_iso_or_equiv 
 _atom_site_adp_type 
 _atom_site_occupancy 
 _atom_site_symmetry_multiplicity 
 _atom_site_calc_flag 
 _atom_site_refinement_flags 
 _atom_site_disorder_assembly 
 _atom_site_disorder_group 
Nd1 Nd 0.37286(4) 0.35971(3) 0.51337(3) 0.02487(11) Uani 1 1 d . . . 
O5 O 0.5653(4) 0.3507(3) 0.4077(3) 0.0327(10) Uani 1 1 d . . . 
O8 O 1.4022(4) 0.5119(3) 0.3997(3) 0.0322(10) Uani 1 1 d . . . 
O1 O 0.3319(4) 0.2896(3) 0.6655(3) 0.0345(10) Uani 1 1 d . . . 
O2 O 0.5167(4) 0.2510(3) 0.5965(3) 0.0397(11) Uani 1 1 d . . . 
O6 O 0.7212(4) 0.5067(3) 0.4069(3) 0.0361(10) Uani 1 1 d . . . 
N4 N 0.2683(5) 0.1691(3) 0.4241(3) 0.0333(13) Uani 1 1 d . . . 
N3 N 0.0818(5) 0.2675(4) 0.5045(3) 0.0317(12) Uani 1 1 d . . . 
C26 C 1.2920(6) 0.4496(5) 0.3403(4) 0.0296(15) Uani 1 1 d . . . 
C19 C 0.6778(6) 0.4104(5) 0.3816(4) 0.0265(14) Uani 1 1 d . . . 
C20 C 1.1125(6) 0.4282(4) 0.1862(4) 0.0286(15) Uani 1 1 d . . . 
O7 O 1.2201(4) 0.3668(3) 0.3629(3) 0.0391(11) Uani 1 1 d . . . 
C17 C 0.9748(6) 0.3729(4) 0.2243(4) 0.0280(14) Uani 1 1 d . . . 
C25 C 1.2579(6) 0.4690(4) 0.2409(4) 0.0268(14) Uani 1 1 d . . . 
C1 C 0.4483(7) 0.2562(4) 0.6683(5) 0.0324(16) Uani 1 1 d . . . 
N2 N 0.7902(5) 0.2113(4) 0.2217(4) 0.0391(14) Uani 1 1 d . . . 
C23 C 1.3596(8) 0.5240(5) 0.1012(5) 0.0455(19) Uani 1 1 d . . . 
H23 H 1.4421 0.5573 0.0725 0.055 Uiso 1 1 calc R . . 
C6 C 0.4295(7) 0.2094(4) 0.8333(5) 0.0364(16) Uani 1 1 d . . . 
H6 H 0.3272 0.2113 0.8265 0.044 Uiso 1 1 calc R . . 
C11 C 0.2229(8) 0.0943(6) 1.0882(6) 0.059(2) Uani 1 1 d . . . 
H11 H 0.1446 0.0360 1.0926 0.071 Uiso 1 1 calc R . . 
C24 C 1.3804(7) 0.5174(4) 0.1986(4) 0.0335(16) Uani 1 1 d . . . 
H24 H 1.4773 0.5456 0.2357 0.040 Uiso 1 1 calc R . . 
O3 O 0.3283(6) -0.0169(4) 0.8761(4) 0.0709(16) Uani 1 1 d D . . 
H5 H 0.2821 -0.0760 0.8391 0.07(3) Uiso 1 1 d RD . . 
C16 C 0.9151(6) 0.2680(5) 0.1947(4) 0.0359(16) Uani 1 1 d . . . 
H16 H 0.9661 0.2348 0.1529 0.043 Uiso 1 1 calc R . . 
C14 C 0.7682(6) 0.3629(4) 0.3155(4) 0.0291(15) Uani 1 1 d . . . 
C18 C 0.8972(6) 0.4198(4) 0.2853(4) 0.0303(15) Uani 1 1 d . . . 
H18 H 0.9322 0.4908 0.3066 0.036 Uiso 1 1 calc R . . 
C2 C 0.5113(7) 0.2260(4) 0.7588(5) 0.0310(15) Uani 1 1 d . . . 
C35 C 0.1167(7) 0.1192(4) 0.4132(4) 0.0331(16) Uani 1 1 d . . . 
C38 C 0.3599(7) 0.1200(5) 0.3865(5) 0.0422(17) Uani 1 1 d . . . 
H38 H 0.4650 0.1533 0.3960 0.051 Uiso 1 1 calc R . . 
O4 O 0.1271(6) -0.0669(5) 0.9460(5) 0.121(3) Uani 1 1 d . . . 
C15 C 0.7194(6) 0.2586(4) 0.2809(4) 0.0338(16) Uani 1 1 d . . . 
H15 H 0.6313 0.2195 0.3006 0.041 Uiso 1 1 calc R . . 
N1 N 0.7311(6) 0.2052(5) 0.8541(5) 0.0581(17) Uani 1 1 d . . . 
C33 C -0.1038(8) -0.0309(5) 0.3570(5) 0.057(2) Uani 1 1 d . . . 
H33 H -0.1452 -0.0978 0.3230 0.068 Uiso 1 1 calc R . . 
C4 C 0.6482(8) 0.1896(5) 0.9233(5) 0.053(2) Uani 1 1 d . . . 
H4 H 0.6956 0.1773 0.9810 0.064 Uiso 1 1 calc R . . 
C36 C 0.1580(8) -0.0280(5) 0.3217(5) 0.054(2) Uani 1 1 d . . . 
H36 H 0.1222 -0.0942 0.2858 0.064 Uiso 1 1 calc R . . 
C5 C 0.4966(8) 0.1899(4) 0.9179(5) 0.0376(17) Uani 1 1 d . . . 
C7 C 0.4148(7) 0.1791(5) 1.0030(5) 0.0406(17) Uani 1 1 d . . . 
C31 C 0.0191(7) 0.1699(4) 0.4572(4) 0.0329(15) Uani 1 1 d . . . 
C29 C -0.2276(7) 0.1724(6) 0.4988(5) 0.0486(19) Uani 1 1 d . . . 
H29 H -0.3314 0.1405 0.4990 0.058 Uiso 1 1 calc R . . 
C27 C -0.0111(7) 0.3139(5) 0.5442(5) 0.0443(18) Uani 1 1 d . . . 
H27 H 0.0302 0.3820 0.5752 0.053 Uiso 1 1 calc R . . 
C30 C -0.1386(7) 0.1189(5) 0.4521(5) 0.0381(17) Uani 1 1 d . . . 
C13 C 0.2419(9) 0.0003(6) 0.9374(6) 0.071(3) Uani 1 1 d . . . 
C9 C 0.3851(9) 0.2597(6) 1.1552(5) 0.061(2) Uani 1 1 d . . . 
H9 H 0.4191 0.3154 1.2057 0.073 Uiso 1 1 calc R . . 
C34 C 0.0546(8) 0.0185(5) 0.3623(5) 0.0462(18) Uani 1 1 d . . . 
C22 C 1.2187(8) 0.4818(5) 0.0473(5) 0.052(2) Uani 1 1 d . . . 
H22 H 1.2052 0.4847 -0.0187 0.063 Uiso 1 1 calc R . . 
C21 C 1.0958(7) 0.4349(5) 0.0897(4) 0.0464(18) Uani 1 1 d . . . 
H21 H 0.9994 0.4071 0.0520 0.056 Uiso 1 1 calc R . . 
C32 C -0.1941(8) 0.0181(6) 0.4005(5) 0.060(2) Uani 1 1 d . . . 
H32 H -0.2981 -0.0161 0.3965 0.072 Uiso 1 1 calc R . . 
C37 C 0.3096(8) 0.0221(5) 0.3337(5) 0.0517(19) Uani 1 1 d . . . 
H37 H 0.3787 -0.0092 0.3067 0.062 Uiso 1 1 calc R . . 
C12 C 0.2984(7) 0.0978(5) 1.0087(5) 0.0431(17) Uani 1 1 d . . . 
C10 C 0.2651(9) 0.1782(6) 1.1608(5) 0.060(2) Uani 1 1 d . . . 
H10 H 0.2117 0.1792 1.2135 0.072 Uiso 1 1 calc R . . 
O9 O -0.0435(6) 0.7980(4) 0.1082(4) 0.095(2) Uani 1 1 d D . . 
H1W H 0.0501 0.7972 0.1198 0.114 Uiso 1 1 d R . . 
H2W H 0.0080 0.7734 0.0699 0.28(8) Uiso 1 1 d RD . . 
C3 C 0.6614(8) 0.2225(5) 0.7728(5) 0.0446(18) Uani 1 1 d . . . 
H3 H 0.7179 0.2329 0.7219 0.054 Uiso 1 1 calc R . . 
C8 C 0.4552(8) 0.2589(5) 1.0745(5) 0.053(2) Uani 1 1 d . . . 
H8 H 0.5344 0.3164 1.0695 0.064 Uiso 1 1 calc R . . 
O10 O 0.1576(9) 0.3753(5) 0.7970(5) 0.181(4) Uani 1 1 d . . . 
H3W H 0.2095 0.3507 0.7582 0.217 Uiso 1 1 d R . . 
H4W H 0.1225 0.3246 0.8257 0.217 Uiso 1 1 d R . . 
C28 C -0.1657(7) 0.2694(5) 0.5434(5) 0.0477(19) Uani 1 1 d . . . 
H28 H -0.2258 0.3064 0.5735 0.057 Uiso 1 1 calc R . . 
 
loop_ 
 _atom_site_aniso_label 
 _atom_site_aniso_U_11 
 _atom_site_aniso_U_22 
 _atom_site_aniso_U_33 
 _atom_site_aniso_U_23 
 _atom_site_aniso_U_13 
 _atom_site_aniso_U_12 
Nd1 0.02468(17) 0.02403(17) 0.0249(2) 0.00202(14) 0.00632(14) 0.00477(13) 
O5 0.031(2) 0.032(2) 0.037(3) 0.004(2) 0.015(2) 0.0058(18) 
O8 0.029(2) 0.036(2) 0.031(3) 0.002(2) 0.001(2) 0.010(2) 
O1 0.036(2) 0.044(3) 0.030(3) 0.014(2) 0.008(2) 0.018(2) 
O2 0.043(3) 0.050(3) 0.033(3) 0.011(2) 0.010(2) 0.021(2) 
O6 0.034(2) 0.029(2) 0.045(3) -0.002(2) 0.012(2) 0.0090(19) 
N4 0.038(3) 0.029(3) 0.035(3) 0.007(3) 0.010(3) 0.010(2) 
N3 0.035(3) 0.033(3) 0.029(3) 0.006(3) 0.009(3) 0.010(2) 
C26 0.022(3) 0.037(4) 0.026(4) -0.003(3) 0.001(3) 0.007(3) 
C19 0.026(3) 0.033(4) 0.020(4) 0.000(3) 0.002(3) 0.009(3) 
C20 0.036(4) 0.030(3) 0.024(4) 0.003(3) 0.013(3) 0.013(3) 
O7 0.036(2) 0.041(3) 0.033(3) 0.015(2) -0.001(2) -0.003(2) 
C17 0.030(3) 0.035(4) 0.020(4) 0.001(3) 0.005(3) 0.011(3) 
C25 0.031(3) 0.025(3) 0.021(4) -0.004(3) 0.003(3) 0.007(3) 
C1 0.041(4) 0.026(4) 0.028(4) 0.005(3) 0.000(4) 0.005(3) 
N2 0.042(3) 0.036(3) 0.038(4) -0.006(3) 0.016(3) 0.011(3) 
C23 0.056(5) 0.035(4) 0.044(5) 0.006(4) 0.022(4) 0.004(3) 
C6 0.039(4) 0.032(4) 0.036(5) -0.001(3) 0.000(4) 0.011(3) 
C11 0.069(5) 0.058(5) 0.055(6) 0.011(4) 0.010(5) 0.024(4) 
C24 0.035(4) 0.030(4) 0.032(4) 0.005(3) 0.001(3) 0.003(3) 
O3 0.100(4) 0.035(3) 0.070(4) -0.006(3) 0.038(3) 0.002(3) 
C16 0.033(4) 0.042(4) 0.040(4) 0.003(3) 0.018(3) 0.020(3) 
C14 0.032(3) 0.033(4) 0.022(4) -0.002(3) 0.003(3) 0.012(3) 
C18 0.028(3) 0.027(3) 0.033(4) 0.001(3) 0.006(3) 0.005(3) 
C2 0.033(4) 0.028(3) 0.033(4) 0.003(3) 0.001(3) 0.013(3) 
C35 0.037(4) 0.031(4) 0.031(4) 0.011(3) 0.004(3) 0.008(3) 
C38 0.049(4) 0.035(4) 0.046(5) 0.006(4) 0.006(4) 0.016(3) 
O4 0.079(4) 0.101(5) 0.153(6) -0.055(5) 0.051(4) -0.008(4) 
C15 0.032(3) 0.032(4) 0.033(4) -0.002(3) 0.011(3) 0.002(3) 
N1 0.057(4) 0.082(5) 0.049(4) 0.022(4) 0.011(4) 0.036(3) 
C33 0.054(5) 0.035(4) 0.061(6) 0.005(4) -0.015(4) -0.013(4) 
C4 0.066(5) 0.067(5) 0.039(5) 0.018(4) 0.002(4) 0.038(4) 
C36 0.068(5) 0.033(4) 0.052(5) -0.006(4) -0.002(4) 0.010(4) 
C5 0.056(5) 0.030(4) 0.029(4) 0.006(3) 0.001(4) 0.018(3) 
C7 0.049(4) 0.038(4) 0.035(5) 0.008(4) -0.005(4) 0.017(3) 
C31 0.039(4) 0.030(4) 0.025(4) 0.010(3) -0.005(3) 0.003(3) 
C29 0.028(4) 0.065(5) 0.056(5) 0.025(4) 0.008(4) 0.011(4) 
C27 0.035(4) 0.046(4) 0.045(5) 0.001(4) 0.011(4) 0.001(3) 
C30 0.031(4) 0.032(4) 0.039(5) 0.012(3) -0.009(3) -0.010(3) 
C13 0.060(5) 0.061(6) 0.093(7) 0.001(5) 0.039(5) 0.013(5) 
C9 0.092(6) 0.054(5) 0.036(5) -0.011(4) -0.009(5) 0.039(5) 
C34 0.059(5) 0.028(4) 0.046(5) 0.010(3) -0.002(4) 0.005(4) 
C22 0.065(5) 0.071(5) 0.027(4) 0.015(4) 0.017(4) 0.022(4) 
C21 0.043(4) 0.069(5) 0.026(4) 0.010(4) 0.002(4) 0.013(4) 
C32 0.033(4) 0.058(5) 0.077(6) 0.017(5) -0.003(4) -0.008(4) 
C37 0.073(5) 0.036(4) 0.052(5) -0.001(4) 0.020(4) 0.025(4) 
C12 0.051(4) 0.056(5) 0.026(4) 0.001(4) 0.008(4) 0.023(4) 
C10 0.079(6) 0.079(6) 0.041(5) 0.014(5) 0.018(5) 0.048(5) 
O9 0.067(4) 0.129(5) 0.103(5) 0.026(4) 0.018(4) 0.045(4) 
C3 0.054(5) 0.049(4) 0.040(5) 0.013(4) 0.011(4) 0.025(4) 
C8 0.095(6) 0.039(4) 0.036(5) 0.008(4) 0.020(5) 0.028(4) 
O10 0.307(10) 0.169(7) 0.173(7) 0.103(6) 0.169(7) 0.163(7) 
C28 0.037(4) 0.052(5) 0.055(5) 0.010(4) 0.016(4) 0.010(4) 
 
_geom_special_details 
; 
 All esds (except the esd in the dihedral angle between two l.s. planes) 
 are estimated using the full covariance matrix.  The cell esds are taken 
 into account individually in the estimation of esds in distances, angles 
 and torsion angles; correlations between esds in cell parameters are only 
 used when they are defined by crystal symmetry.  An approximate (isotropic) 
 treatment of cell esds is used for estimating esds involving l.s. planes. 
; 
 
loop_ 
 _geom_bond_atom_site_label_1 
 _geom_bond_atom_site_label_2 
 _geom_bond_distance 
 _geom_bond_site_symmetry_2 
 _geom_bond_publ_flag 
Nd1 O6 2.398(4) 2_666 ? 
Nd1 O8 2.402(5) 2_766 ? 
Nd1 O7 2.423(5) 1_455 ? 
Nd1 O5 2.432(4) . ? 
Nd1 O1 2.474(5) . ? 
Nd1 O2 2.513(5) . ? 
Nd1 N3 2.597(6) . ? 
Nd1 N4 2.608(6) . ? 
Nd1 O8 2.741(5) 1_455 ? 
Nd1 C26 2.957(7) 1_455 ? 
Nd1 Nd1 3.994(5) 2_666 ? 
O5 C19 1.251(6) . ? 
O8 C26 1.269(6) . ? 
O8 Nd1 2.402(5) 2_766 ? 
O8 Nd1 2.741(5) 1_655 ? 
O1 C1 1.250(7) . ? 
O2 C1 1.247(7) . ? 
O6 C19 1.254(6) . ? 
O6 Nd1 2.398(4) 2_666 ? 
N4 C38 1.306(7) . ? 
N4 C35 1.350(7) . ? 
N3 C27 1.306(7) . ? 
N3 C31 1.349(7) . ? 
C26 O7 1.242(6) . ? 
C26 C25 1.468(8) . ? 
C26 Nd1 2.957(7) 1_655 ? 
C19 C14 1.497(7) . ? 
C20 C21 1.366(8) . ? 
C20 C25 1.389(7) . ? 
C20 C17 1.476(7) . ? 
O7 Nd1 2.423(5) 1_655 ? 
C17 C18 1.365(7) . ? 
C17 C16 1.375(7) . ? 
C25 C24 1.376(7) . ? 
C1 C2 1.483(8) . ? 
N2 C15 1.309(7) . ? 
N2 C16 1.319(7) . ? 
C23 C22 1.354(8) . ? 
C23 C24 1.379(8) . ? 
C23 H23 0.9300 . ? 
C6 C2 1.359(8) . ? 
C6 C5 1.361(8) . ? 
C6 H6 0.9300 . ? 
C11 C10 1.370(9) . ? 
C11 C12 1.375(8) . ? 
C11 H11 0.9300 . ? 
C24 H24 0.9300 . ? 
O3 C13 1.267(8) . ? 
O3 H5 0.8724 . ? 
C16 H16 0.9300 . ? 
C14 C18 1.369(7) . ? 
C14 C15 1.373(7) . ? 
C18 H18 0.9300 . ? 
C2 C3 1.368(8) . ? 
C35 C34 1.399(8) . ? 
C35 C31 1.402(8) . ? 
C38 C37 1.373(8) . ? 
C38 H38 0.9300 . ? 
O4 C13 1.223(8) . ? 
C15 H15 0.9300 . ? 
N1 C4 1.300(8) . ? 
N1 C3 1.320(7) . ? 
C33 C32 1.332(9) . ? 
C33 C34 1.410(9) . ? 
C33 H33 0.9300 . ? 
C4 C5 1.370(9) . ? 
C4 H4 0.9300 . ? 
C36 C37 1.350(8) . ? 
C36 C34 1.391(9) . ? 
C36 H36 0.9300 . ? 
C5 C7 1.480(8) . ? 
C7 C8 1.324(8) . ? 
C7 C12 1.334(8) . ? 
C31 C30 1.410(8) . ? 
C29 C28 1.330(8) . ? 
C29 C30 1.381(8) . ? 
C29 H29 0.9300 . ? 
C27 C28 1.376(8) . ? 
C27 H27 0.9300 . ? 
C30 C32 1.400(9) . ? 
C13 C12 1.488(9) . ? 
C9 C10 1.354(9) . ? 
C9 C8 1.362(9) . ? 
C9 H9 0.9300 . ? 
C22 C21 1.371(8) . ? 
C22 H22 0.9300 . ? 
C21 H21 0.9300 . ? 
C32 H32 0.9300 . ? 
C37 H37 0.9300 . ? 
C10 H10 0.9300 . ? 
O9 H1W 0.8496 . ? 
O9 H2W 0.8428 . ? 
C3 H3 0.9300 . ? 
C8 H8 0.9300 . ? 
O10 H3W 0.8505 . ? 
O10 H4W 0.8505 . ? 
C28 H28 0.9300 . ? 
 
loop_ 
 _geom_angle_atom_site_label_1 
 _geom_angle_atom_site_label_2 
 _geom_angle_atom_site_label_3 
 _geom_angle 
 _geom_angle_site_symmetry_1 
 _geom_angle_site_symmetry_3 
 _geom_angle_publ_flag 
O6 Nd1 O8 74.45(17) 2_666 2_766 ? 
O6 Nd1 O7 89.13(16) 2_666 1_455 ? 
O8 Nd1 O7 127.70(14) 2_766 1_455 ? 
O6 Nd1 O5 136.34(13) 2_666 . ? 
O8 Nd1 O5 77.50(16) 2_766 . ? 
O7 Nd1 O5 82.26(18) 1_455 . ? 
O6 Nd1 O1 81.66(15) 2_666 . ? 
O8 Nd1 O1 88.97(15) 2_766 . ? 
O7 Nd1 O1 138.13(15) 1_455 . ? 
O5 Nd1 O1 130.66(14) . . ? 
O6 Nd1 O2 125.54(16) 2_666 . ? 
O8 Nd1 O2 78.08(17) 2_766 . ? 
O7 Nd1 O2 143.52(14) 1_455 . ? 
O5 Nd1 O2 79.12(16) . . ? 
O1 Nd1 O2 51.60(13) . . ? 
O6 Nd1 N3 77.65(17) 2_666 . ? 
O8 Nd1 N3 147.70(14) 2_766 . ? 
O7 Nd1 N3 67.09(15) 1_455 . ? 
O5 Nd1 N3 134.76(15) . . ? 
O1 Nd1 N3 71.04(14) . . ? 
O2 Nd1 N3 106.10(17) . . ? 
O6 Nd1 N4 139.30(16) 2_666 . ? 
O8 Nd1 N4 144.45(14) 2_766 . ? 
O7 Nd1 N4 74.05(15) 1_455 . ? 
O5 Nd1 N4 78.77(14) . . ? 
O1 Nd1 N4 86.78(16) . . ? 
O2 Nd1 N4 71.72(17) . . ? 
N3 Nd1 N4 61.70(15) . . ? 
O6 Nd1 O8 73.01(15) 2_666 1_455 ? 
O8 Nd1 O8 78.30(15) 2_766 1_455 ? 
O7 Nd1 O8 49.42(12) 1_455 1_455 ? 
O5 Nd1 O8 68.99(13) . 1_455 ? 
O1 Nd1 O8 153.86(12) . 1_455 ? 
O2 Nd1 O8 143.60(13) . 1_455 ? 
N3 Nd1 O8 108.70(13) . 1_455 ? 
N4 Nd1 O8 116.71(16) . 1_455 ? 
O6 Nd1 C26 82.32(17) 2_666 1_455 ? 
O8 Nd1 C26 103.55(17) 2_766 1_455 ? 
O7 Nd1 C26 24.19(13) 1_455 1_455 ? 
O5 Nd1 C26 72.53(16) . 1_455 ? 
O1 Nd1 C26 156.17(15) . 1_455 ? 
O2 Nd1 C26 150.34(14) . 1_455 ? 
N3 Nd1 C26 88.37(16) . 1_455 ? 
N4 Nd1 C26 94.03(18) . 1_455 ? 
O8 Nd1 C26 25.37(12) 1_455 1_455 ? 
O6 Nd1 Nd1 68.80(14) 2_666 2_666 ? 
O8 Nd1 Nd1 42.22(10) 2_766 2_666 ? 
O7 Nd1 Nd1 85.49(11) 1_455 2_666 ? 
O5 Nd1 Nd1 67.90(11) . 2_666 ? 
O1 Nd1 Nd1 127.24(9) . 2_666 ? 
O2 Nd1 Nd1 115.34(14) . 2_666 ? 
N3 Nd1 Nd1 136.75(11) . 2_666 ? 
N4 Nd1 Nd1 142.92(12) . 2_666 ? 
O8 Nd1 Nd1 36.08(9) 1_455 2_666 ? 
C26 Nd1 Nd1 61.37(13) 1_455 2_666 ? 
C19 O5 Nd1 138.7(4) . . ? 
C26 O8 Nd1 169.7(4) . 2_766 ? 
C26 O8 Nd1 86.9(4) . 1_655 ? 
Nd1 O8 Nd1 101.70(15) 2_766 1_655 ? 
C1 O1 Nd1 93.9(4) . . ? 
C1 O2 Nd1 92.2(4) . . ? 
C19 O6 Nd1 138.3(4) . 2_666 ? 
C38 N4 C35 118.1(5) . . ? 
C38 N4 Nd1 121.2(4) . . ? 
C35 N4 Nd1 120.7(4) . . ? 
C27 N3 C31 117.0(5) . . ? 
C27 N3 Nd1 121.6(4) . . ? 
C31 N3 Nd1 121.4(4) . . ? 
O7 C26 O8 120.2(6) . . ? 
O7 C26 C25 118.8(5) . . ? 
O8 C26 C25 120.6(5) . . ? 
O7 C26 Nd1 53.1(3) . 1_655 ? 
O8 C26 Nd1 67.7(3) . 1_655 ? 
C25 C26 Nd1 164.8(4) . 1_655 ? 
O5 C19 O6 125.1(5) . . ? 
O5 C19 C14 117.4(5) . . ? 
O6 C19 C14 117.5(5) . . ? 
C21 C20 C25 118.4(5) . . ? 
C21 C20 C17 117.2(5) . . ? 
C25 C20 C17 124.3(5) . . ? 
C26 O7 Nd1 102.8(4) . 1_655 ? 
C18 C17 C16 116.6(5) . . ? 
C18 C17 C20 124.2(5) . . ? 
C16 C17 C20 119.2(5) . . ? 
C24 C25 C20 120.2(6) . . ? 
C24 C25 C26 117.3(5) . . ? 
C20 C25 C26 121.9(5) . . ? 
O2 C1 O1 120.8(6) . . ? 
O2 C1 C2 118.7(6) . . ? 
O1 C1 C2 120.4(6) . . ? 
C15 N2 C16 117.4(5) . . ? 
C22 C23 C24 119.7(6) . . ? 
C22 C23 H23 120.1 . . ? 
C24 C23 H23 120.1 . . ? 
C2 C6 C5 120.3(6) . . ? 
C2 C6 H6 119.8 . . ? 
C5 C6 H6 119.8 . . ? 
C10 C11 C12 118.7(7) . . ? 
C10 C11 H11 120.6 . . ? 
C12 C11 H11 120.6 . . ? 
C25 C24 C23 120.0(6) . . ? 
C25 C24 H24 120.0 . . ? 
C23 C24 H24 120.0 . . ? 
C13 O3 H5 108.2 . . ? 
N2 C16 C17 124.4(5) . . ? 
N2 C16 H16 117.8 . . ? 
C17 C16 H16 117.8 . . ? 
C18 C14 C15 117.7(5) . . ? 
C18 C14 C19 122.7(5) . . ? 
C15 C14 C19 119.6(5) . . ? 
C17 C18 C14 120.4(5) . . ? 
C17 C18 H18 119.8 . . ? 
C14 C18 H18 119.8 . . ? 
C6 C2 C3 117.4(6) . . ? 
C6 C2 C1 122.5(6) . . ? 
C3 C2 C1 119.8(6) . . ? 
N4 C35 C34 122.7(6) . . ? 
N4 C35 C31 118.2(6) . . ? 
C34 C35 C31 119.1(6) . . ? 
N4 C38 C37 123.6(6) . . ? 
N4 C38 H38 118.2 . . ? 
C37 C38 H38 118.2 . . ? 
N2 C15 C14 123.5(5) . . ? 
N2 C15 H15 118.3 . . ? 
C14 C15 H15 118.3 . . ? 
C4 N1 C3 116.4(6) . . ? 
C32 C33 C34 120.0(7) . . ? 
C32 C33 H33 120.0 . . ? 
C34 C33 H33 120.0 . . ? 
N1 C4 C5 125.2(7) . . ? 
N1 C4 H4 117.4 . . ? 
C5 C4 H4 117.4 . . ? 
C37 C36 C34 120.7(6) . . ? 
C37 C36 H36 119.6 . . ? 
C34 C36 H36 119.6 . . ? 
C6 C5 C4 116.7(6) . . ? 
C6 C5 C7 121.8(6) . . ? 
C4 C5 C7 121.3(6) . . ? 
C8 C7 C12 119.0(7) . . ? 
C8 C7 C5 116.8(6) . . ? 
C12 C7 C5 124.1(6) . . ? 
N3 C31 C35 117.8(5) . . ? 
N3 C31 C30 122.0(6) . . ? 
C35 C31 C30 120.2(6) . . ? 
C28 C29 C30 120.3(6) . . ? 
C28 C29 H29 119.8 . . ? 
C30 C29 H29 119.8 . . ? 
N3 C27 C28 124.7(6) . . ? 
N3 C27 H27 117.7 . . ? 
C28 C27 H27 117.7 . . ? 
C29 C30 C32 124.6(6) . . ? 
C29 C30 C31 117.3(6) . . ? 
C32 C30 C31 118.1(6) . . ? 
O4 C13 O3 120.8(8) . . ? 
O4 C13 C12 121.0(7) . . ? 
O3 C13 C12 117.5(7) . . ? 
C10 C9 C8 119.0(7) . . ? 
C10 C9 H9 120.5 . . ? 
C8 C9 H9 120.5 . . ? 
C36 C34 C35 116.2(6) . . ? 
C36 C34 C33 123.8(7) . . ? 
C35 C34 C33 119.9(7) . . ? 
C23 C22 C21 120.4(6) . . ? 
C23 C22 H22 119.8 . . ? 
C21 C22 H22 119.8 . . ? 
C20 C21 C22 121.2(6) . . ? 
C20 C21 H21 119.4 . . ? 
C22 C21 H21 119.4 . . ? 
C33 C32 C30 122.6(7) . . ? 
C33 C32 H32 118.7 . . ? 
C30 C32 H32 118.7 . . ? 
C36 C37 C38 118.7(6) . . ? 
C36 C37 H37 120.6 . . ? 
C38 C37 H37 120.6 . . ? 
C7 C12 C11 121.3(7) . . ? 
C7 C12 C13 126.2(7) . . ? 
C11 C12 C13 112.3(7) . . ? 
C9 C10 C11 119.5(7) . . ? 
C9 C10 H10 120.3 . . ? 
C11 C10 H10 120.3 . . ? 
H1W O9 H2W 52.5 . . ? 
N1 C3 C2 124.0(6) . . ? 
N1 C3 H3 118.0 . . ? 
C2 C3 H3 118.0 . . ? 
C7 C8 C9 122.4(7) . . ? 
C7 C8 H8 118.8 . . ? 
C9 C8 H8 118.8 . . ? 
H3W O10 H4W 102.5 . . ? 
C29 C28 C27 118.7(6) . . ? 
C29 C28 H28 120.6 . . ? 
C27 C28 H28 120.6 . . ? 
 
loop_ 
 _geom_torsion_atom_site_label_1 
 _geom_torsion_atom_site_label_2 
 _geom_torsion_atom_site_label_3 
 _geom_torsion_atom_site_label_4 
 _geom_torsion 
 _geom_torsion_site_symmetry_1 
 _geom_torsion_site_symmetry_2 
 _geom_torsion_site_symmetry_3 
 _geom_torsion_site_symmetry_4 
 _geom_torsion_publ_flag 
O6 Nd1 O5 C19 15.3(6) 2_666 . . . ? 
O8 Nd1 O5 C19 -35.7(5) 2_766 . . . ? 
O7 Nd1 O5 C19 95.8(6) 1_455 . . . ? 
O1 Nd1 O5 C19 -113.3(5) . . . . ? 
O2 Nd1 O5 C19 -115.7(6) . . . . ? 
N3 Nd1 O5 C19 142.3(5) . . . . ? 
N4 Nd1 O5 C19 171.0(6) . . . . ? 
O8 Nd1 O5 C19 46.4(5) 1_455 . . . ? 
C26 Nd1 O5 C19 73.1(6) 1_455 . . . ? 
Nd1 Nd1 O5 C19 7.5(5) 2_666 . . . ? 
O6 Nd1 O1 C1 -143.1(4) 2_666 . . . ? 
O8 Nd1 O1 C1 -68.7(4) 2_766 . . . ? 
O7 Nd1 O1 C1 137.6(4) 1_455 . . . ? 
O5 Nd1 O1 C1 3.8(4) . . . . ? 
O2 Nd1 O1 C1 6.9(3) . . . . ? 
N3 Nd1 O1 C1 137.1(4) . . . . ? 
N4 Nd1 O1 C1 76.0(4) . . . . ? 
O8 Nd1 O1 C1 -128.9(4) 1_455 . . . ? 
C26 Nd1 O1 C1 168.7(4) 1_455 . . . ? 
Nd1 Nd1 O1 C1 -87.9(4) 2_666 . . . ? 
O6 Nd1 O2 C1 30.6(4) 2_666 . . . ? 
O8 Nd1 O2 C1 91.4(4) 2_766 . . . ? 
O7 Nd1 O2 C1 -128.6(4) 1_455 . . . ? 
O5 Nd1 O2 C1 170.7(4) . . . . ? 
O1 Nd1 O2 C1 -6.9(3) . . . . ? 
N3 Nd1 O2 C1 -55.6(4) . . . . ? 
N4 Nd1 O2 C1 -107.6(4) . . . . ? 
O8 Nd1 O2 C1 141.9(3) 1_455 . . . ? 
C26 Nd1 O2 C1 -172.1(4) 1_455 . . . ? 
Nd1 Nd1 O2 C1 111.7(3) 2_666 . . . ? 
O6 Nd1 N4 C38 178.4(4) 2_666 . . . ? 
O8 Nd1 N4 C38 -24.7(6) 2_766 . . . ? 
O7 Nd1 N4 C38 109.3(5) 1_455 . . . ? 
O5 Nd1 N4 C38 24.2(4) . . . . ? 
O1 Nd1 N4 C38 -108.4(5) . . . . ? 
O2 Nd1 N4 C38 -57.9(5) . . . . ? 
N3 Nd1 N4 C38 -178.6(5) . . . . ? 
O8 Nd1 N4 C38 83.6(5) 1_455 . . . ? 
C26 Nd1 N4 C38 95.5(5) 1_455 . . . ? 
Nd1 Nd1 N4 C38 50.2(5) 2_666 . . . ? 
O6 Nd1 N4 C35 0.2(5) 2_666 . . . ? 
O8 Nd1 N4 C35 157.2(4) 2_766 . . . ? 
O7 Nd1 N4 C35 -68.9(4) 1_455 . . . ? 
O5 Nd1 N4 C35 -153.9(4) . . . . ? 
O1 Nd1 N4 C35 73.5(4) . . . . ? 
O2 Nd1 N4 C35 123.9(4) . . . . ? 
N3 Nd1 N4 C35 3.3(4) . . . . ? 
O8 Nd1 N4 C35 -94.5(4) 1_455 . . . ? 
C26 Nd1 N4 C35 -82.7(4) 1_455 . . . ? 
Nd1 Nd1 N4 C35 -128.0(4) 2_666 . . . ? 
O6 Nd1 N3 C27 -2.7(4) 2_666 . . . ? 
O8 Nd1 N3 C27 28.0(6) 2_766 . . . ? 
O7 Nd1 N3 C27 -97.1(5) 1_455 . . . ? 
O5 Nd1 N3 C27 -148.4(4) . . . . ? 
O1 Nd1 N3 C27 82.6(5) . . . . ? 
O2 Nd1 N3 C27 121.1(5) . . . . ? 
N4 Nd1 N3 C27 179.3(5) . . . . ? 
O8 Nd1 N3 C27 -69.8(5) 1_455 . . . ? 
C26 Nd1 N3 C27 -85.2(5) 1_455 . . . ? 
Nd1 Nd1 N3 C27 -42.1(5) 2_666 . . . ? 
O6 Nd1 N3 C31 176.1(4) 2_666 . . . ? 
O8 Nd1 N3 C31 -153.2(4) 2_766 . . . ? 
O7 Nd1 N3 C31 81.7(4) 1_455 . . . ? 
O5 Nd1 N3 C31 30.4(5) . . . . ? 
O1 Nd1 N3 C31 -98.6(4) . . . . ? 
O2 Nd1 N3 C31 -60.1(4) . . . . ? 
N4 Nd1 N3 C31 -1.9(4) . . . . ? 
O8 Nd1 N3 C31 109.0(4) 1_455 . . . ? 
C26 Nd1 N3 C31 93.6(4) 1_455 . . . ? 
Nd1 Nd1 N3 C31 136.7(4) 2_666 . . . ? 
Nd1 O8 C26 O7 155.1(18) 2_766 . . . ? 
Nd1 O8 C26 O7 7.9(5) 1_655 . . . ? 
Nd1 O8 C26 C25 -19(2) 2_766 . . . ? 
Nd1 O8 C26 C25 -165.8(5) 1_655 . . . ? 
Nd1 O8 C26 Nd1 147(2) 2_766 . . 1_655 ? 
Nd1 O5 C19 O6 -2.8(10) . . . . ? 
Nd1 O5 C19 C14 176.8(3) . . . . ? 
Nd1 O6 C19 O5 -11.7(10) 2_666 . . . ? 
Nd1 O6 C19 C14 168.7(4) 2_666 . . . ? 
O8 C26 O7 Nd1 -9.2(6) . . . 1_655 ? 
C25 C26 O7 Nd1 164.6(4) . . . 1_655 ? 
C21 C20 C17 C18 -110.3(7) . . . . ? 
C25 C20 C17 C18 73.0(8) . . . . ? 
C21 C20 C17 C16 67.1(8) . . . . ? 
C25 C20 C17 C16 -109.7(7) . . . . ? 
C21 C20 C25 C24 1.8(9) . . . . ? 
C17 C20 C25 C24 178.5(5) . . . . ? 
C21 C20 C25 C26 -169.2(6) . . . . ? 
C17 C20 C25 C26 7.5(9) . . . . ? 
O7 C26 C25 C24 -141.0(5) . . . . ? 
O8 C26 C25 C24 32.7(8) . . . . ? 
Nd1 C26 C25 C24 -87.2(15) 1_655 . . . ? 
O7 C26 C25 C20 30.3(8) . . . . ? 
O8 C26 C25 C20 -156.0(5) . . . . ? 
Nd1 C26 C25 C20 84.0(16) 1_655 . . . ? 
Nd1 O2 C1 O1 12.5(6) . . . . ? 
Nd1 O2 C1 C2 -165.1(5) . . . . ? 
Nd1 O1 C1 O2 -12.7(6) . . . . ? 
Nd1 O1 C1 C2 164.8(5) . . . . ? 
C20 C25 C24 C23 -1.1(9) . . . . ? 
C26 C25 C24 C23 170.4(5) . . . . ? 
C22 C23 C24 C25 -0.7(9) . . . . ? 
C15 N2 C16 C17 -0.2(9) . . . . ? 
C18 C17 C16 N2 -0.3(9) . . . . ? 
C20 C17 C16 N2 -177.9(5) . . . . ? 
O5 C19 C14 C18 -177.2(5) . . . . ? 
O6 C19 C14 C18 2.4(8) . . . . ? 
O5 C19 C14 C15 4.4(8) . . . . ? 
O6 C19 C14 C15 -175.9(5) . . . . ? 
C16 C17 C18 C14 1.0(8) . . . . ? 
C20 C17 C18 C14 178.4(5) . . . . ? 
C15 C14 C18 C17 -1.1(8) . . . . ? 
C19 C14 C18 C17 -179.5(5) . . . . ? 
C5 C6 C2 C3 -0.2(9) . . . . ? 
C5 C6 C2 C1 -174.7(5) . . . . ? 
O2 C1 C2 C6 -166.6(6) . . . . ? 
O1 C1 C2 C6 15.8(9) . . . . ? 
O2 C1 C2 C3 19.1(8) . . . . ? 
O1 C1 C2 C3 -158.5(6) . . . . ? 
C38 N4 C35 C34 -0.9(9) . . . . ? 
Nd1 N4 C35 C34 177.3(4) . . . . ? 
C38 N4 C35 C31 177.2(5) . . . . ? 
Nd1 N4 C35 C31 -4.6(7) . . . . ? 
C35 N4 C38 C37 2.3(9) . . . . ? 
Nd1 N4 C38 C37 -175.8(5) . . . . ? 
C16 N2 C15 C14 0.1(9) . . . . ? 
C18 C14 C15 N2 0.5(9) . . . . ? 
C19 C14 C15 N2 178.9(5) . . . . ? 
C3 N1 C4 C5 0.0(11) . . . . ? 
C2 C6 C5 C4 0.9(9) . . . . ? 
C2 C6 C5 C7 175.4(6) . . . . ? 
N1 C4 C5 C6 -0.8(10) . . . . ? 
N1 C4 C5 C7 -175.4(7) . . . . ? 
C6 C5 C7 C8 -103.4(7) . . . . ? 
C4 C5 C7 C8 70.9(8) . . . . ? 
C6 C5 C7 C12 72.2(9) . . . . ? 
C4 C5 C7 C12 -113.5(8) . . . . ? 
C27 N3 C31 C35 179.3(5) . . . . ? 
Nd1 N3 C31 C35 0.4(7) . . . . ? 
C27 N3 C31 C30 -1.3(9) . . . . ? 
Nd1 N3 C31 C30 179.8(4) . . . . ? 
N4 C35 C31 N3 2.7(8) . . . . ? 
C34 C35 C31 N3 -179.1(5) . . . . ? 
N4 C35 C31 C30 -176.6(5) . . . . ? 
C34 C35 C31 C30 1.6(9) . . . . ? 
C31 N3 C27 C28 2.1(9) . . . . ? 
Nd1 N3 C27 C28 -179.1(5) . . . . ? 
C28 C29 C30 C32 -177.8(6) . . . . ? 
C28 C29 C30 C31 2.2(10) . . . . ? 
N3 C31 C30 C29 -0.7(9) . . . . ? 
C35 C31 C30 C29 178.6(6) . . . . ? 
N3 C31 C30 C32 179.3(6) . . . . ? 
C35 C31 C30 C32 -1.3(9) . . . . ? 
C37 C36 C34 C35 1.5(10) . . . . ? 
C37 C36 C34 C33 -176.7(7) . . . . ? 
N4 C35 C34 C36 -1.0(9) . . . . ? 
C31 C35 C34 C36 -179.1(6) . . . . ? 
N4 C35 C34 C33 177.3(6) . . . . ? 
C31 C35 C34 C33 -0.8(9) . . . . ? 
C32 C33 C34 C36 177.9(7) . . . . ? 
C32 C33 C34 C35 -0.2(10) . . . . ? 
C24 C23 C22 C21 1.7(10) . . . . ? 
C25 C20 C21 C22 -0.8(10) . . . . ? 
C17 C20 C21 C22 -177.8(6) . . . . ? 
C23 C22 C21 C20 -0.9(11) . . . . ? 
C34 C33 C32 C30 0.4(11) . . . . ? 
C29 C30 C32 C33 -179.6(7) . . . . ? 
C31 C30 C32 C33 0.3(11) . . . . ? 
C34 C36 C37 C38 -0.3(11) . . . . ? 
N4 C38 C37 C36 -1.8(10) . . . . ? 
C8 C7 C12 C11 -1.7(10) . . . . ? 
C5 C7 C12 C11 -177.2(6) . . . . ? 
C8 C7 C12 C13 -177.4(7) . . . . ? 
C5 C7 C12 C13 7.1(11) . . . . ? 
C10 C11 C12 C7 2.6(11) . . . . ? 
C10 C11 C12 C13 178.8(6) . . . . ? 
O4 C13 C12 C7 -174.9(8) . . . . ? 
O3 C13 C12 C7 15.0(12) . . . . ? 
O4 C13 C12 C11 9.1(11) . . . . ? 
O3 C13 C12 C11 -161.0(7) . . . . ? 
C8 C9 C10 C11 3.9(11) . . . . ? 
C12 C11 C10 C9 -3.7(11) . . . . ? 
C4 N1 C3 C2 0.8(10) . . . . ? 
C6 C2 C3 N1 -0.7(10) . . . . ? 
C1 C2 C3 N1 173.9(6) . . . . ? 
C12 C7 C8 C9 1.9(11) . . . . ? 
C5 C7 C8 C9 177.8(6) . . . . ? 
C10 C9 C8 C7 -3.0(11) . . . . ? 
C30 C29 C28 C27 -1.7(10) . . . . ? 
N3 C27 C28 C29 -0.6(10) . . . . ? 
 
loop_ 
 _geom_hbond_atom_site_label_D 
 _geom_hbond_atom_site_label_H 
 _geom_hbond_atom_site_label_A 
 _geom_hbond_distance_DH 
 _geom_hbond_distance_HA 
 _geom_hbond_distance_DA 
 _geom_hbond_angle_DHA 
 _geom_hbond_site_symmetry_A 
O10 H4W O9  0.85 2.01 2.864(9) 178.2 2_566 
O10 H3W O1  0.85 2.04 2.886(7) 179.1 . 
O9 H1W N1  0.85 1.99 2.837(9) 179.6 2_666 
O9 H1W N1  0.85 1.99 2.837(9) 179.6 2_666 
O3 H5 N2  0.87 1.84 2.699(8) 168.1 2_656 
 
_diffrn_measured_fraction_theta_max    0.979 
_diffrn_reflns_theta_full              25.50 
_diffrn_measured_fraction_theta_full   0.979 
_refine_diff_density_max    1.438 
_refine_diff_density_min   -1.332 
_refine_diff_density_rms    0.149 

#===END
 
data_p-1 (Compound 11)
 
_audit_creation_method            SHELXL-97 
_chemical_name_systematic 
; 
 ? 
; 
_chemical_name_common             ? 
_chemical_melting_point           ? 
_chemical_formula_moiety          ? 
_chemical_formula_sum 
 'C38 H27 Eu N4 O10' 
_chemical_formula_weight          851.60 
 
loop_ 
 _atom_type_symbol 
 _atom_type_description 
 _atom_type_scat_dispersion_real 
 _atom_type_scat_dispersion_imag 
 _atom_type_scat_source 
 'C'  'C'   0.0033   0.0016 
 'International Tables Vol C Tables 4.2.6.8 and 6.1.1.4' 
 'H'  'H'   0.0000   0.0000 
 'International Tables Vol C Tables 4.2.6.8 and 6.1.1.4' 
 'Eu'  'Eu'  -0.1578   3.6682 
 'International Tables Vol C Tables 4.2.6.8 and 6.1.1.4' 
 'N'  'N'   0.0061   0.0033 
 'International Tables Vol C Tables 4.2.6.8 and 6.1.1.4' 
 'O'  'O'   0.0106   0.0060 
 'International Tables Vol C Tables 4.2.6.8 and 6.1.1.4' 
 
_symmetry_cell_setting            Triclinic  
_symmetry_space_group_name_H-M    P-1 
 
loop_ 
 _symmetry_equiv_pos_as_xyz 
 'x, y, z' 
 '-x, -y, -z' 
 
_cell_length_a                    9.172(10) 
_cell_length_b                    13.688(15) 
_cell_length_c                    14.179(15) 
_cell_angle_alpha                 97.073(11) 
_cell_angle_beta                  96.666(10) 
_cell_angle_gamma                 105.301(10) 
_cell_volume                      1683(3) 
_cell_formula_units_Z             2 
_cell_measurement_temperature     293(2) 
_cell_measurement_reflns_used     ? 
_cell_measurement_theta_min       ? 
_cell_measurement_theta_max       ? 
 
_exptl_crystal_description        block 
_exptl_crystal_colour             colourless 
_exptl_crystal_size_max           0.28 
_exptl_crystal_size_mid           0.26 
_exptl_crystal_size_min           0.24 
_exptl_crystal_density_meas       ? 
_exptl_crystal_density_diffrn     1.680 
_exptl_crystal_density_method     'not measured' 
_exptl_crystal_F_000              852 
_exptl_absorpt_coefficient_mu     1.932 
_exptl_absorpt_correction_type    multi-scan
_exptl_absorpt_correction_T_min   0.6138 
_exptl_absorpt_correction_T_max   0.6543 
_exptl_absorpt_process_details    ? 
 
_exptl_special_details 
; 
 ? 
; 
 
_diffrn_ambient_temperature       293(2) 
_diffrn_radiation_wavelength      0.71073 
_diffrn_radiation_type            MoK\a 
_diffrn_radiation_source          'fine-focus sealed tube' 
_diffrn_radiation_monochromator   graphite 
_diffrn_measurement_device_type   'Bruker APEX-II CCD' 
_diffrn_measurement_method        '\f and \w scans' 
_diffrn_detector_area_resol_mean  ? 
_diffrn_reflns_number             11877 
_diffrn_reflns_av_R_equivalents   0.0661 
_diffrn_reflns_av_sigmaI/netI     0.1093 
_diffrn_reflns_limit_h_min        -11 
_diffrn_reflns_limit_h_max        10 
_diffrn_reflns_limit_k_min        -15 
_diffrn_reflns_limit_k_max        16 
_diffrn_reflns_limit_l_min        -17 
_diffrn_reflns_limit_l_max        17 
_diffrn_reflns_theta_min          2.31 
_diffrn_reflns_theta_max          25.50 
_reflns_number_total              6134 
_reflns_number_gt                 4499 
_reflns_threshold_expression      >2sigma(I) 
 
_computing_data_collection        'Bruker APEX2' 
_computing_cell_refinement        'Bruker SAINT' 
_computing_data_reduction         'Bruker SAINT' 
_computing_structure_solution     'SHELXS-97 (Sheldrick, 2008)' 
_computing_structure_refinement   'SHELXL-97 (Sheldrick, 2008)' 
_computing_molecular_graphics     'Bruker SHELXTL' 
_computing_publication_material   'Bruker SHELXTL'
 
_refine_special_details 
; 
 Refinement of F^2^ against ALL reflections.  The weighted R-factor wR and 
 goodness of fit S are based on F^2^, conventional R-factors R are based 
 on F, with F set to zero for negative F^2^. The threshold expression of 
 F^2^ > 2sigma(F^2^) is used only for calculating R-factors(gt) etc. and is 
 not relevant to the choice of reflections for refinement.  R-factors based 
 on F^2^ are statistically about twice as large as those based on F, and R- 
 factors based on ALL data will be even larger. 
; 
 
_refine_ls_structure_factor_coef  Fsqd  
_refine_ls_matrix_type            full 
_refine_ls_weighting_scheme       calc  
_refine_ls_weighting_details 
 'calc w=1/[\s^2^(Fo^2^)+(0.0000P)^2^+0.0000P] where P=(Fo^2^+2Fc^2^)/3' 
_atom_sites_solution_primary      direct 
_atom_sites_solution_secondary    difmap 
_atom_sites_solution_hydrogens    geom 
_refine_ls_hydrogen_treatment     constr
_refine_ls_extinction_method      none 
_refine_ls_extinction_coef        ? 
_refine_ls_number_reflns          6134 
_refine_ls_number_parameters      475 
_refine_ls_number_restraints      1 
_refine_ls_R_factor_all           0.0776 
_refine_ls_R_factor_gt            0.0478 
_refine_ls_wR_factor_ref          0.0873 
_refine_ls_wR_factor_gt           0.0785 
_refine_ls_goodness_of_fit_ref    1.037 
_refine_ls_restrained_S_all       1.037 
_refine_ls_shift/su_max           0.001 
_refine_ls_shift/su_mean          0.000 
 
loop_ 
 _atom_site_label 
 _atom_site_type_symbol 
 _atom_site_fract_x 
 _atom_site_fract_y 
 _atom_site_fract_z 
 _atom_site_U_iso_or_equiv 
 _atom_site_adp_type 
 _atom_site_occupancy 
 _atom_site_symmetry_multiplicity 
 _atom_site_calc_flag 
 _atom_site_refinement_flags 
 _atom_site_disorder_assembly 
 _atom_site_disorder_group 
C12 C 0.3967(6) 0.4226(4) 0.2861(4) 0.0323(15) Uani 1 1 d . . . 
H12 H 0.4316 0.4932 0.3064 0.039 Uiso 1 1 calc R . . 
N1 N 0.2876(6) 0.2137(4) 0.2231(4) 0.0434(14) Uani 1 1 d . . . 
C10 C 0.2159(7) 0.2618(4) 0.2812(4) 0.0374(15) Uani 1 1 d . . . 
H10 H 0.1270 0.2232 0.2993 0.045 Uiso 1 1 calc R . . 
C11 C 0.2653(6) 0.3655(4) 0.3163(4) 0.0310(14) Uani 1 1 d . . . 
O3 O 0.0626(4) 0.3530(3) 0.4073(3) 0.0339(10) Uani 1 1 d . . . 
C13 C 0.1749(7) 0.4126(5) 0.3823(4) 0.0297(14) Uani 1 1 d . . . 
O4 O 0.2189(4) 0.5097(3) 0.4080(3) 0.0366(10) Uani 1 1 d . . . 
Eu1 Eu 0.87258(3) 0.36010(2) 0.51224(2) 0.02745(11) Uani 1 1 d . . . 
C14 C 0.9480(7) 0.2574(4) 0.6647(4) 0.0316(15) Uani 1 1 d . . . 
C1 C 0.7956(6) 0.4510(5) 0.3416(4) 0.0316(15) Uani 1 1 d . . . 
N3 N 0.5822(5) 0.2696(4) 0.5030(3) 0.0339(12) Uani 1 1 d . . . 
O2 O 0.9062(4) 0.5147(3) 0.4017(3) 0.0377(10) Uani 1 1 d . . . 
O5 O 1.0194(4) 0.2547(3) 0.5929(3) 0.0408(11) Uani 1 1 d . . . 
O6 O 0.8318(4) 0.2908(3) 0.6629(3) 0.0361(10) Uani 1 1 d . . . 
C2 C 0.7603(6) 0.4714(4) 0.2422(4) 0.0293(14) Uani 1 1 d . . . 
C39 C 0.6191(7) 0.1215(4) 0.4141(4) 0.0331(15) Uani 1 1 d . . . 
C8 C 0.4750(6) 0.3755(4) 0.2265(4) 0.0284(14) Uani 1 1 d . . . 
C32 C 0.3087(8) 0.0162(5) 0.3999(6) 0.060(2) Uani 1 1 d . . . 
H32 H 0.2057 -0.0186 0.3955 0.072 Uiso 1 1 calc R . . 
C19 C 0.9267(7) 0.2094(4) 0.8290(4) 0.0360(16) Uani 1 1 d . . . 
H19 H 0.8255 0.2113 0.8218 0.043 Uiso 1 1 calc R . . 
C34 C 0.4007(8) -0.0309(5) 0.3585(5) 0.061(2) Uani 1 1 d . . . 
H34 H 0.3607 -0.0979 0.3263 0.074 Uiso 1 1 calc R . . 
C24 C 0.7223(8) 0.0941(5) 1.0884(6) 0.056(2) Uani 1 1 d . . . 
H24 H 0.6436 0.0372 1.0939 0.067 Uiso 1 1 calc R . . 
C31 C 0.5223(7) 0.1721(4) 0.4559(4) 0.0362(16) Uani 1 1 d . . . 
C3 C 0.8818(7) 0.5186(4) 0.1983(4) 0.0362(15) Uani 1 1 d . . . 
H3 H 0.9782 0.5472 0.2349 0.043 Uiso 1 1 calc R . . 
C7 C 0.6142(6) 0.4305(4) 0.1872(4) 0.0290(14) Uani 1 1 d . . . 
C38 C 0.8649(8) 0.1233(5) 0.3876(5) 0.0443(17) Uani 1 1 d . . . 
H38 H 0.9690 0.1569 0.3973 0.053 Uiso 1 1 calc R . . 
N4 N 0.7719(6) 0.1725(3) 0.4242(3) 0.0339(12) Uani 1 1 d . . . 
C27 C 0.4890(7) 0.3158(5) 0.5413(5) 0.0452(17) Uani 1 1 d . . . 
H27 H 0.5297 0.3837 0.5709 0.054 Uiso 1 1 calc R . . 
C9 C 0.4143(7) 0.2706(5) 0.1970(4) 0.0403(16) Uani 1 1 d . . . 
H9 H 0.4652 0.2376 0.1562 0.048 Uiso 1 1 calc R . . 
O1 O 0.7244(5) 0.3675(3) 0.3632(3) 0.0451(12) Uani 1 1 d . . . 
C15 C 1.0108(7) 0.2266(4) 0.7543(4) 0.0344(15) Uani 1 1 d . . . 
C4 C 0.8616(8) 0.5239(5) 0.1011(5) 0.0494(18) Uani 1 1 d . . . 
H4 H 0.9444 0.5550 0.0725 0.059 Uiso 1 1 calc R . . 
C30 C 0.3650(7) 0.1191(5) 0.4511(5) 0.0449(18) Uani 1 1 d . . . 
C28 C 0.3334(7) 0.2701(5) 0.5406(5) 0.0486(18) Uani 1 1 d . . . 
H28 H 0.2730 0.3063 0.5692 0.058 Uiso 1 1 calc R . . 
C5 C 0.7204(8) 0.4835(5) 0.0473(5) 0.0544(19) Uani 1 1 d . . . 
H5 H 0.7066 0.4868 -0.0181 0.065 Uiso 1 1 calc R . . 
C20 C 0.9129(7) 0.1781(5) 0.9998(4) 0.0406(16) Uani 1 1 d . . . 
C29 C 0.2734(7) 0.1713(6) 0.4970(5) 0.053(2) Uani 1 1 d . . . 
H29 H 0.1711 0.1380 0.4975 0.063 Uiso 1 1 calc R . . 
C35 C 0.5604(8) 0.0202(5) 0.3629(5) 0.0440(17) Uani 1 1 d . . . 
C26 C 0.7408(10) -0.0049(6) 0.9365(6) 0.063(2) Uani 1 1 d . . . 
C22 C 0.8820(9) 0.2598(6) 1.1535(5) 0.059(2) Uani 1 1 d . . . 
H22 H 0.9141 0.3154 1.2031 0.071 Uiso 1 1 calc R . . 
C16 C 1.1603(8) 0.2224(5) 0.7695(5) 0.0466(17) Uani 1 1 d . . . 
H16 H 1.2168 0.2337 0.7195 0.056 Uiso 1 1 calc R . . 
C37 C 0.8145(9) 0.0242(5) 0.3357(5) 0.056(2) Uani 1 1 d . . . 
H37 H 0.8832 -0.0068 0.3102 0.067 Uiso 1 1 calc R . . 
C25 C 0.7958(7) 0.0919(5) 1.0075(5) 0.0426(17) Uani 1 1 d . . . 
N2 N 1.2296(7) 0.2037(5) 0.8498(4) 0.0581(16) Uani 1 1 d . . . 
C36 C 0.6623(9) -0.0263(5) 0.3232(5) 0.055(2) Uani 1 1 d . . . 
H36 H 0.6263 -0.0922 0.2880 0.066 Uiso 1 1 calc R . . 
C23 C 0.7632(9) 0.1779(7) 1.1599(5) 0.059(2) Uani 1 1 d . . . 
H23 H 0.7106 0.1787 1.2121 0.070 Uiso 1 1 calc R . . 
O7 O 0.8272(6) -0.0181(3) 0.8742(4) 0.0700(16) Uani 1 1 d . . . 
H7 H 0.7860 -0.0719 0.8372 0.105 Uiso 1 1 calc R . . 
C21 C 0.9551(8) 0.2606(5) 1.0736(5) 0.057(2) Uani 1 1 d . . . 
H21 H 1.0343 0.3178 1.0694 0.068 Uiso 1 1 calc R . . 
C6 C 0.5973(8) 0.4375(5) 0.0903(5) 0.0486(18) Uani 1 1 d . . . 
H6 H 0.5011 0.4107 0.0531 0.058 Uiso 1 1 calc R . . 
O8 O 0.6289(7) -0.0732(5) 0.9473(5) 0.102(2) Uani 1 1 d . . . 
C18 C 0.9942(8) 0.1894(4) 0.9142(4) 0.0386(16) Uani 1 1 d . . . 
C17 C 1.1448(8) 0.1886(5) 0.9206(5) 0.054(2) Uani 1 1 d . . . 
H17 H 1.1913 0.1766 0.9783 0.065 Uiso 1 1 calc R . . 
O10 O 0.3416(11) 0.6259(6) 0.2036(6) 0.186(5) Uani 1 1 d D . . 
H3W H 0.2917 0.6485 0.2408 0.223 Uiso 1 1 d R . . 
H4W H 0.3643 0.6729 0.1727 0.223 Uiso 0.74(17) 1 d PRD . . 
O9 O 0.4590(6) 0.8014(4) 0.1092(4) 0.0934(18) Uiso 1 1 d . . . 
H1W H 0.4417 0.7401 0.0854 0.112 Uiso 1 1 d R . . 
H2W H 0.5517 0.8008 0.1216 0.112 Uiso 1 1 d R . . 
 
loop_ 
 _atom_site_aniso_label 
 _atom_site_aniso_U_11 
 _atom_site_aniso_U_22 
 _atom_site_aniso_U_33 
 _atom_site_aniso_U_23 
 _atom_site_aniso_U_13 
 _atom_site_aniso_U_12 
C12 0.038(4) 0.025(3) 0.029(4) 0.003(3) 0.004(3) 0.003(3) 
N1 0.044(3) 0.031(3) 0.053(4) -0.002(3) 0.018(3) 0.005(3) 
C10 0.036(4) 0.032(4) 0.042(4) 0.006(3) 0.015(3) 0.002(3) 
C11 0.029(3) 0.035(3) 0.027(4) 0.002(3) 0.006(3) 0.005(3) 
O3 0.031(2) 0.032(2) 0.035(3) 0.0061(19) 0.0170(19) -0.0018(19) 
C13 0.031(4) 0.037(4) 0.023(3) 0.005(3) 0.008(3) 0.012(3) 
O4 0.035(2) 0.032(2) 0.040(3) 0.004(2) 0.014(2) 0.0030(19) 
Eu1 0.02782(17) 0.02627(16) 0.02516(18) 0.00532(12) 0.00558(12) 0.00114(12) 
C14 0.031(4) 0.028(3) 0.034(4) 0.011(3) 0.007(3) 0.002(3) 
C1 0.029(3) 0.042(4) 0.023(3) 0.002(3) 0.004(3) 0.009(3) 
N3 0.031(3) 0.037(3) 0.031(3) 0.008(2) 0.009(2) 0.001(2) 
O2 0.033(2) 0.039(2) 0.031(2) -0.0027(19) 0.0003(19) -0.0005(19) 
O5 0.040(3) 0.058(3) 0.032(3) 0.015(2) 0.013(2) 0.020(2) 
O6 0.036(2) 0.045(3) 0.030(2) 0.012(2) 0.0098(19) 0.012(2) 
C2 0.034(4) 0.025(3) 0.026(4) 0.004(3) 0.010(3) 0.002(3) 
C39 0.031(4) 0.026(3) 0.036(4) 0.011(3) -0.001(3) -0.002(3) 
C8 0.028(3) 0.035(3) 0.021(3) 0.004(3) 0.002(3) 0.007(3) 
C32 0.040(4) 0.050(5) 0.076(6) 0.017(4) -0.002(4) -0.013(4) 
C19 0.040(4) 0.028(3) 0.039(4) 0.008(3) 0.005(3) 0.008(3) 
C34 0.052(5) 0.041(4) 0.069(6) 0.000(4) -0.006(4) -0.014(4) 
C24 0.060(5) 0.058(5) 0.054(5) 0.013(4) 0.019(4) 0.017(4) 
C31 0.037(4) 0.035(4) 0.033(4) 0.016(3) 0.000(3) 0.003(3) 
C3 0.041(4) 0.031(3) 0.033(4) 0.002(3) 0.010(3) 0.004(3) 
C7 0.032(3) 0.035(3) 0.025(3) 0.008(3) 0.010(3) 0.012(3) 
C38 0.047(4) 0.039(4) 0.047(5) 0.008(3) 0.010(3) 0.011(3) 
N4 0.040(3) 0.030(3) 0.029(3) 0.009(2) 0.009(2) 0.003(2) 
C27 0.040(4) 0.043(4) 0.046(4) 0.003(3) 0.008(3) 0.002(3) 
C9 0.038(4) 0.044(4) 0.041(4) -0.001(3) 0.014(3) 0.016(3) 
O1 0.047(3) 0.041(3) 0.035(3) 0.016(2) -0.002(2) -0.010(2) 
C15 0.040(4) 0.026(3) 0.036(4) 0.009(3) 0.007(3) 0.005(3) 
C4 0.059(5) 0.044(4) 0.045(5) 0.014(3) 0.023(4) 0.005(4) 
C30 0.042(4) 0.044(4) 0.042(4) 0.019(3) -0.002(3) -0.001(3) 
C28 0.035(4) 0.063(5) 0.048(5) 0.014(4) 0.015(3) 0.010(4) 
C5 0.067(5) 0.074(5) 0.027(4) 0.021(4) 0.017(4) 0.019(4) 
C20 0.059(5) 0.040(4) 0.027(4) 0.010(3) 0.005(3) 0.020(3) 
C29 0.027(4) 0.066(5) 0.061(5) 0.028(4) 0.007(4) -0.002(4) 
C35 0.053(4) 0.029(4) 0.041(4) 0.007(3) 0.000(3) -0.001(3) 
C26 0.057(5) 0.057(5) 0.071(6) -0.001(5) 0.014(5) 0.011(4) 
C22 0.083(6) 0.059(5) 0.038(5) -0.002(4) 0.005(4) 0.031(5) 
C16 0.053(5) 0.055(4) 0.037(4) 0.013(3) 0.014(3) 0.018(4) 
C37 0.072(5) 0.040(4) 0.058(5) 0.004(4) 0.014(4) 0.020(4) 
C25 0.054(4) 0.039(4) 0.034(4) -0.003(3) 0.003(3) 0.016(3) 
N2 0.058(4) 0.084(5) 0.044(4) 0.020(3) 0.009(3) 0.035(3) 
C36 0.077(6) 0.032(4) 0.047(5) -0.002(3) -0.002(4) 0.009(4) 
C23 0.074(6) 0.089(6) 0.029(4) 0.017(4) 0.017(4) 0.045(5) 
O7 0.100(4) 0.039(3) 0.062(4) -0.004(3) 0.039(3) -0.001(3) 
C21 0.077(5) 0.042(4) 0.049(5) 0.010(4) 0.012(4) 0.010(4) 
C6 0.043(4) 0.068(5) 0.034(4) 0.016(4) 0.003(3) 0.012(4) 
O8 0.073(4) 0.084(4) 0.128(6) -0.032(4) 0.036(4) -0.005(3) 
C18 0.055(4) 0.029(3) 0.033(4) 0.007(3) 0.003(3) 0.014(3) 
C17 0.067(5) 0.065(5) 0.038(5) 0.014(4) -0.002(4) 0.032(4) 
O10 0.314(12) 0.175(8) 0.178(9) 0.107(7) 0.170(9) 0.166(8) 
 
_geom_special_details 
; 
 All esds (except the esd in the dihedral angle between two l.s. planes) 
 are estimated using the full covariance matrix.  The cell esds are taken 
 into account individually in the estimation of esds in distances, angles 
 and torsion angles; correlations between esds in cell parameters are only 
 used when they are defined by crystal symmetry.  An approximate (isotropic) 
 treatment of cell esds is used for estimating esds involving l.s. planes. 
; 
 
loop_ 
 _geom_bond_atom_site_label_1 
 _geom_bond_atom_site_label_2 
 _geom_bond_distance 
 _geom_bond_site_symmetry_2 
 _geom_bond_publ_flag 
C12 C8 1.377(8) . ? 
C12 C11 1.398(7) . ? 
C12 H12 0.9300 . ? 
N1 C10 1.329(7) . ? 
N1 C9 1.337(7) . ? 
C10 C11 1.379(7) . ? 
C10 H10 0.9300 . ? 
C11 C13 1.514(8) . ? 
O3 C13 1.251(6) . ? 
O3 Eu1 2.432(4) 1_455 ? 
C13 O4 1.275(6) . ? 
O4 Eu1 2.381(4) 2_666 ? 
Eu1 O2 2.371(4) 2_766 ? 
Eu1 O4 2.381(4) 2_666 ? 
Eu1 O1 2.404(4) . ? 
Eu1 O3 2.432(4) 1_655 ? 
Eu1 O6 2.470(4) . ? 
Eu1 O5 2.505(4) . ? 
Eu1 N4 2.588(5) . ? 
Eu1 N3 2.604(5) . ? 
Eu1 O2 2.760(4) . ? 
Eu1 Eu1 4.005(4) 2_766 ? 
C14 O6 1.264(7) . ? 
C14 O5 1.276(7) . ? 
C14 C15 1.488(8) . ? 
C1 O1 1.251(6) . ? 
C1 O2 1.290(6) . ? 
C1 C2 1.485(8) . ? 
N3 C27 1.317(8) . ? 
N3 C31 1.355(7) . ? 
O2 Eu1 2.371(4) 2_766 ? 
C2 C3 1.388(8) . ? 
C2 C7 1.404(7) . ? 
C39 N4 1.372(7) . ? 
C39 C31 1.402(8) . ? 
C39 C35 1.417(8) . ? 
C8 C9 1.386(7) . ? 
C8 C7 1.506(8) . ? 
C32 C34 1.334(10) . ? 
C32 C30 1.434(9) . ? 
C32 H32 0.9300 . ? 
C19 C18 1.384(8) . ? 
C19 C15 1.388(8) . ? 
C19 H19 0.9300 . ? 
C34 C35 1.438(9) . ? 
C34 H34 0.9300 . ? 
C24 C23 1.372(9) . ? 
C24 C25 1.398(9) . ? 
C24 H24 0.9300 . ? 
C31 C30 1.423(8) . ? 
C3 C4 1.382(8) . ? 
C3 H3 0.9300 . ? 
C7 C6 1.382(8) . ? 
C38 N4 1.330(7) . ? 
C38 C37 1.393(8) . ? 
C38 H38 0.9300 . ? 
C27 C28 1.397(8) . ? 
C27 H27 0.9300 . ? 
C9 H9 0.9300 . ? 
C15 C16 1.380(8) . ? 
C4 C5 1.361(8) . ? 
C4 H4 0.9300 . ? 
C30 C29 1.404(9) . ? 
C28 C29 1.355(8) . ? 
C28 H28 0.9300 . ? 
C5 C6 1.387(8) . ? 
C5 H5 0.9300 . ? 
C20 C21 1.379(8) . ? 
C20 C25 1.396(8) . ? 
C20 C18 1.500(8) . ? 
C29 H29 0.9300 . ? 
C35 C36 1.393(9) . ? 
C26 O8 1.231(8) . ? 
C26 O7 1.280(8) . ? 
C26 C25 1.491(9) . ? 
C22 C23 1.362(9) . ? 
C22 C21 1.382(9) . ? 
C22 H22 0.9300 . ? 
C16 N2 1.325(8) . ? 
C16 H16 0.9300 . ? 
C37 C36 1.365(9) . ? 
C37 H37 0.9300 . ? 
N2 C17 1.343(8) . ? 
C36 H36 0.9300 . ? 
C23 H23 0.9300 . ? 
O7 H7 0.8200 . ? 
C21 H21 0.9300 . ? 
C6 H6 0.9300 . ? 
C18 C17 1.377(9) . ? 
C17 H17 0.9300 . ? 
O10 H3W 0.8209 . ? 
O10 H4W 0.8182 . ? 
O9 H1W 0.8308 . ? 
O9 H2W 0.8504 . ? 
 
loop_ 
 _geom_angle_atom_site_label_1 
 _geom_angle_atom_site_label_2 
 _geom_angle_atom_site_label_3 
 _geom_angle 
 _geom_angle_site_symmetry_1 
 _geom_angle_site_symmetry_3 
 _geom_angle_publ_flag 
C8 C12 C11 120.6(5) . . ? 
C8 C12 H12 119.7 . . ? 
C11 C12 H12 119.7 . . ? 
C10 N1 C9 117.2(5) . . ? 
N1 C10 C11 124.0(6) . . ? 
N1 C10 H10 118.0 . . ? 
C11 C10 H10 118.0 . . ? 
C10 C11 C12 117.1(6) . . ? 
C10 C11 C13 119.7(5) . . ? 
C12 C11 C13 123.2(5) . . ? 
C13 O3 Eu1 138.8(4) . 1_455 ? 
O3 C13 O4 125.1(5) . . ? 
O3 C13 C11 117.2(5) . . ? 
O4 C13 C11 117.6(5) . . ? 
C13 O4 Eu1 138.2(4) . 2_666 ? 
O2 Eu1 O4 74.57(15) 2_766 2_666 ? 
O2 Eu1 O1 127.67(14) 2_766 . ? 
O4 Eu1 O1 89.84(15) 2_666 . ? 
O2 Eu1 O3 77.50(15) 2_766 1_655 ? 
O4 Eu1 O3 136.39(13) 2_666 1_655 ? 
O1 Eu1 O3 81.44(16) . 1_655 ? 
O2 Eu1 O6 88.60(14) 2_766 . ? 
O4 Eu1 O6 80.92(14) 2_666 . ? 
O1 Eu1 O6 138.67(14) . . ? 
O3 Eu1 O6 131.21(14) 1_655 . ? 
O2 Eu1 O5 77.01(15) 2_766 . ? 
O4 Eu1 O5 125.64(15) 2_666 . ? 
O1 Eu1 O5 143.22(14) . . ? 
O3 Eu1 O5 78.31(15) 1_655 . ? 
O6 Eu1 O5 52.94(14) . . ? 
O2 Eu1 N4 143.50(15) 2_766 . ? 
O4 Eu1 N4 139.92(16) 2_666 . ? 
O1 Eu1 N4 74.52(15) . . ? 
O3 Eu1 N4 78.41(14) 1_655 . ? 
O6 Eu1 N4 87.02(15) . . ? 
O5 Eu1 N4 71.54(15) . . ? 
O2 Eu1 N3 147.34(15) 2_766 . ? 
O4 Eu1 N3 77.00(16) 2_666 . ? 
O1 Eu1 N3 67.44(15) . . ? 
O3 Eu1 N3 135.08(15) 1_655 . ? 
O6 Eu1 N3 71.23(14) . . ? 
O5 Eu1 N3 107.80(15) . . ? 
N4 Eu1 N3 62.94(16) . . ? 
O2 Eu1 O2 77.62(14) 2_766 . ? 
O4 Eu1 O2 73.02(14) 2_666 . ? 
O1 Eu1 O2 50.08(12) . . ? 
O3 Eu1 O2 68.71(13) 1_655 . ? 
O6 Eu1 O2 152.92(12) . . ? 
O5 Eu1 O2 141.87(13) . . ? 
N4 Eu1 O2 117.79(15) . . ? 
N3 Eu1 O2 108.96(13) . . ? 
O2 Eu1 Eu1 42.31(10) 2_766 2_766 ? 
O4 Eu1 Eu1 68.98(12) 2_666 2_766 ? 
O1 Eu1 Eu1 85.39(10) . 2_766 ? 
O3 Eu1 Eu1 67.77(10) 1_655 2_766 ? 
O6 Eu1 Eu1 126.81(9) . 2_766 ? 
O5 Eu1 Eu1 114.14(12) . 2_766 ? 
N4 Eu1 Eu1 142.85(12) . 2_766 ? 
N3 Eu1 Eu1 136.24(11) . 2_766 ? 
O2 Eu1 Eu1 35.32(8) . 2_766 ? 
O6 C14 O5 121.6(5) . . ? 
O6 C14 C15 120.0(6) . . ? 
O5 C14 C15 118.2(6) . . ? 
O1 C1 O2 120.8(5) . . ? 
O1 C1 C2 118.8(5) . . ? 
O2 C1 C2 120.2(5) . . ? 
C27 N3 C31 117.9(5) . . ? 
C27 N3 Eu1 122.3(4) . . ? 
C31 N3 Eu1 119.7(4) . . ? 
C1 O2 Eu1 170.0(4) . 2_766 ? 
C1 O2 Eu1 85.4(3) . . ? 
Eu1 O2 Eu1 102.38(14) 2_766 . ? 
C14 O5 Eu1 91.2(3) . . ? 
C14 O6 Eu1 93.1(3) . . ? 
C3 C2 C7 119.3(5) . . ? 
C3 C2 C1 117.8(5) . . ? 
C7 C2 C1 122.1(5) . . ? 
N4 C39 C31 118.4(5) . . ? 
N4 C39 C35 120.9(6) . . ? 
C31 C39 C35 120.7(6) . . ? 
C12 C8 C9 116.6(5) . . ? 
C12 C8 C7 124.7(5) . . ? 
C9 C8 C7 118.5(5) . . ? 
C34 C32 C30 121.6(7) . . ? 
C34 C32 H32 119.2 . . ? 
C30 C32 H32 119.2 . . ? 
C18 C19 C15 119.7(6) . . ? 
C18 C19 H19 120.1 . . ? 
C15 C19 H19 120.1 . . ? 
C32 C34 C35 121.1(7) . . ? 
C32 C34 H34 119.4 . . ? 
C35 C34 H34 119.4 . . ? 
C23 C24 C25 121.8(7) . . ? 
C23 C24 H24 119.1 . . ? 
C25 C24 H24 119.1 . . ? 
N3 C31 C39 119.0(5) . . ? 
N3 C31 C30 121.5(6) . . ? 
C39 C31 C30 119.5(6) . . ? 
C4 C3 C2 121.0(6) . . ? 
C4 C3 H3 119.5 . . ? 
C2 C3 H3 119.5 . . ? 
C6 C7 C2 118.4(5) . . ? 
C6 C7 C8 117.6(5) . . ? 
C2 C7 C8 123.9(5) . . ? 
N4 C38 C37 123.4(6) . . ? 
N4 C38 H38 118.3 . . ? 
C37 C38 H38 118.3 . . ? 
C38 N4 C39 118.5(5) . . ? 
C38 N4 Eu1 121.6(4) . . ? 
C39 N4 Eu1 120.0(4) . . ? 
N3 C27 C28 124.8(6) . . ? 
N3 C27 H27 117.6 . . ? 
C28 C27 H27 117.6 . . ? 
N1 C9 C8 124.4(6) . . ? 
N1 C9 H9 117.8 . . ? 
C8 C9 H9 117.8 . . ? 
C1 O1 Eu1 103.1(3) . . ? 
C16 C15 C19 117.2(6) . . ? 
C16 C15 C14 120.9(6) . . ? 
C19 C15 C14 121.7(6) . . ? 
C5 C4 C3 119.9(6) . . ? 
C5 C4 H4 120.1 . . ? 
C3 C4 H4 120.1 . . ? 
C29 C30 C31 117.7(6) . . ? 
C29 C30 C32 123.7(7) . . ? 
C31 C30 C32 118.7(7) . . ? 
C29 C28 C27 117.8(7) . . ? 
C29 C28 H28 121.1 . . ? 
C27 C28 H28 121.1 . . ? 
C4 C5 C6 119.8(6) . . ? 
C4 C5 H5 120.1 . . ? 
C6 C5 H5 120.1 . . ? 
C21 C20 C25 119.0(6) . . ? 
C21 C20 C18 116.8(6) . . ? 
C25 C20 C18 124.2(6) . . ? 
C28 C29 C30 120.3(6) . . ? 
C28 C29 H29 119.9 . . ? 
C30 C29 H29 119.9 . . ? 
C36 C35 C39 118.1(6) . . ? 
C36 C35 C34 123.5(6) . . ? 
C39 C35 C34 118.3(7) . . ? 
O8 C26 O7 122.7(7) . . ? 
O8 C26 C25 120.0(8) . . ? 
O7 C26 C25 116.6(7) . . ? 
C23 C22 C21 120.4(7) . . ? 
C23 C22 H22 119.8 . . ? 
C21 C22 H22 119.8 . . ? 
N2 C16 C15 125.1(7) . . ? 
N2 C16 H16 117.4 . . ? 
C15 C16 H16 117.4 . . ? 
C36 C37 C38 118.6(7) . . ? 
C36 C37 H37 120.7 . . ? 
C38 C37 H37 120.7 . . ? 
C20 C25 C24 118.4(6) . . ? 
C20 C25 C26 125.8(7) . . ? 
C24 C25 C26 115.8(7) . . ? 
C16 N2 C17 115.8(6) . . ? 
C37 C36 C35 120.4(6) . . ? 
C37 C36 H36 119.8 . . ? 
C35 C36 H36 119.8 . . ? 
C22 C23 C24 119.1(7) . . ? 
C22 C23 H23 120.4 . . ? 
C24 C23 H23 120.4 . . ? 
C26 O7 H7 109.5 . . ? 
C20 C21 C22 121.2(7) . . ? 
C20 C21 H21 119.4 . . ? 
C22 C21 H21 119.4 . . ? 
C7 C6 C5 121.5(6) . . ? 
C7 C6 H6 119.2 . . ? 
C5 C6 H6 119.2 . . ? 
C17 C18 C19 117.3(6) . . ? 
C17 C18 C20 120.5(6) . . ? 
C19 C18 C20 122.0(6) . . ? 
N2 C17 C18 124.8(6) . . ? 
N2 C17 H17 117.6 . . ? 
C18 C17 H17 117.6 . . ? 
H3W O10 H4W 101.0 . . ? 
H1W O9 H2W 85.6 . . ? 
 
loop_ 
 _geom_torsion_atom_site_label_1 
 _geom_torsion_atom_site_label_2 
 _geom_torsion_atom_site_label_3 
 _geom_torsion_atom_site_label_4 
 _geom_torsion 
 _geom_torsion_site_symmetry_1 
 _geom_torsion_site_symmetry_2 
 _geom_torsion_site_symmetry_3 
 _geom_torsion_site_symmetry_4 
 _geom_torsion_publ_flag 
C9 N1 C10 C11 -0.7(9) . . . . ? 
N1 C10 C11 C12 1.8(9) . . . . ? 
N1 C10 C11 C13 -180.0(5) . . . . ? 
C8 C12 C11 C10 -2.3(8) . . . . ? 
C8 C12 C11 C13 179.5(5) . . . . ? 
Eu1 O3 C13 O4 -4.1(9) 1_455 . . . ? 
Eu1 O3 C13 C11 175.9(3) 1_455 . . . ? 
C10 C11 C13 O3 4.5(8) . . . . ? 
C12 C11 C13 O3 -177.4(5) . . . . ? 
C10 C11 C13 O4 -175.5(5) . . . . ? 
C12 C11 C13 O4 2.7(8) . . . . ? 
O3 C13 O4 Eu1 -10.3(9) . . . 2_666 ? 
C11 C13 O4 Eu1 169.6(3) . . . 2_666 ? 
O2 Eu1 N3 C27 28.7(6) 2_766 . . . ? 
O4 Eu1 N3 C27 -1.3(5) 2_666 . . . ? 
O1 Eu1 N3 C27 -96.6(5) . . . . ? 
O3 Eu1 N3 C27 -146.5(4) 1_655 . . . ? 
O6 Eu1 N3 C27 83.4(5) . . . . ? 
O5 Eu1 N3 C27 122.3(5) . . . . ? 
N4 Eu1 N3 C27 179.8(5) . . . . ? 
O2 Eu1 N3 C27 -68.0(5) . . . . ? 
Eu1 Eu1 N3 C27 -40.7(5) 2_766 . . . ? 
O2 Eu1 N3 C31 -152.6(4) 2_766 . . . ? 
O4 Eu1 N3 C31 177.4(4) 2_666 . . . ? 
O1 Eu1 N3 C31 82.0(4) . . . . ? 
O3 Eu1 N3 C31 32.2(5) 1_655 . . . ? 
O6 Eu1 N3 C31 -97.9(4) . . . . ? 
O5 Eu1 N3 C31 -59.0(4) . . . . ? 
N4 Eu1 N3 C31 -1.5(4) . . . . ? 
O2 Eu1 N3 C31 110.7(4) . . . . ? 
Eu1 Eu1 N3 C31 138.0(4) 2_766 . . . ? 
O1 C1 O2 Eu1 148.8(18) . . . 2_766 ? 
C2 C1 O2 Eu1 -26(2) . . . 2_766 ? 
O1 C1 O2 Eu1 7.6(5) . . . . ? 
C2 C1 O2 Eu1 -166.8(5) . . . . ? 
O2 Eu1 O2 C1 173.6(4) 2_766 . . . ? 
O4 Eu1 O2 C1 -109.0(3) 2_666 . . . ? 
O1 Eu1 O2 C1 -4.4(3) . . . . ? 
O3 Eu1 O2 C1 92.4(3) 1_655 . . . ? 
O6 Eu1 O2 C1 -125.4(4) . . . . ? 
O5 Eu1 O2 C1 124.3(3) . . . . ? 
N4 Eu1 O2 C1 29.1(4) . . . . ? 
N3 Eu1 O2 C1 -39.7(3) . . . . ? 
Eu1 Eu1 O2 C1 173.6(4) 2_766 . . . ? 
O2 Eu1 O2 Eu1 0.0 2_766 . . 2_766 ? 
O4 Eu1 O2 Eu1 77.42(16) 2_666 . . 2_766 ? 
O1 Eu1 O2 Eu1 -178.0(2) . . . 2_766 ? 
O3 Eu1 O2 Eu1 -81.24(16) 1_655 . . 2_766 ? 
O6 Eu1 O2 Eu1 61.0(3) . . . 2_766 ? 
O5 Eu1 O2 Eu1 -49.3(2) . . . 2_766 ? 
N4 Eu1 O2 Eu1 -144.55(16) . . . 2_766 ? 
N3 Eu1 O2 Eu1 146.72(15) . . . 2_766 ? 
O6 C14 O5 Eu1 10.6(5) . . . . ? 
C15 C14 O5 Eu1 -165.5(4) . . . . ? 
O2 Eu1 O5 C14 92.5(3) 2_766 . . . ? 
O4 Eu1 O5 C14 32.6(4) 2_666 . . . ? 
O1 Eu1 O5 C14 -129.9(3) . . . . ? 
O3 Eu1 O5 C14 172.1(3) 1_655 . . . ? 
O6 Eu1 O5 C14 -5.7(3) . . . . ? 
N4 Eu1 O5 C14 -106.3(3) . . . . ? 
N3 Eu1 O5 C14 -54.0(3) . . . . ? 
O2 Eu1 O5 C14 141.9(3) . . . . ? 
Eu1 Eu1 O5 C14 113.2(3) 2_766 . . . ? 
O5 C14 O6 Eu1 -10.7(5) . . . . ? 
C15 C14 O6 Eu1 165.2(4) . . . . ? 
O2 Eu1 O6 C14 -68.9(3) 2_766 . . . ? 
O4 Eu1 O6 C14 -143.5(3) 2_666 . . . ? 
O1 Eu1 O6 C14 137.2(3) . . . . ? 
O3 Eu1 O6 C14 3.1(4) 1_655 . . . ? 
O5 Eu1 O6 C14 5.8(3) . . . . ? 
N4 Eu1 O6 C14 74.8(3) . . . . ? 
N3 Eu1 O6 C14 137.2(3) . . . . ? 
O2 Eu1 O6 C14 -127.7(3) . . . . ? 
Eu1 Eu1 O6 C14 -88.5(3) 2_766 . . . ? 
O1 C1 C2 C3 -139.2(6) . . . . ? 
O2 C1 C2 C3 35.3(8) . . . . ? 
O1 C1 C2 C7 30.5(8) . . . . ? 
O2 C1 C2 C7 -155.0(5) . . . . ? 
C11 C12 C8 C9 1.7(8) . . . . ? 
C11 C12 C8 C7 177.8(5) . . . . ? 
C30 C32 C34 C35 -0.5(12) . . . . ? 
C27 N3 C31 C39 179.6(5) . . . . ? 
Eu1 N3 C31 C39 0.9(7) . . . . ? 
C27 N3 C31 C30 -2.7(8) . . . . ? 
Eu1 N3 C31 C30 178.6(4) . . . . ? 
N4 C39 C31 N3 1.1(8) . . . . ? 
C35 C39 C31 N3 -179.0(5) . . . . ? 
N4 C39 C31 C30 -176.6(5) . . . . ? 
C35 C39 C31 C30 3.3(9) . . . . ? 
C7 C2 C3 C4 -1.5(9) . . . . ? 
C1 C2 C3 C4 168.5(5) . . . . ? 
C3 C2 C7 C6 1.0(8) . . . . ? 
C1 C2 C7 C6 -168.6(6) . . . . ? 
C3 C2 C7 C8 178.5(5) . . . . ? 
C1 C2 C7 C8 8.9(9) . . . . ? 
C12 C8 C7 C6 -108.5(7) . . . . ? 
C9 C8 C7 C6 67.5(7) . . . . ? 
C12 C8 C7 C2 74.0(8) . . . . ? 
C9 C8 C7 C2 -110.0(6) . . . . ? 
C37 C38 N4 C39 3.0(9) . . . . ? 
C37 C38 N4 Eu1 -176.8(5) . . . . ? 
C31 C39 N4 C38 177.6(5) . . . . ? 
C35 C39 N4 C38 -2.3(8) . . . . ? 
C31 C39 N4 Eu1 -2.6(7) . . . . ? 
C35 C39 N4 Eu1 177.5(4) . . . . ? 
O2 Eu1 N4 C38 -24.1(6) 2_766 . . . ? 
O4 Eu1 N4 C38 -179.8(4) 2_666 . . . ? 
O1 Eu1 N4 C38 109.7(5) . . . . ? 
O3 Eu1 N4 C38 25.5(4) 1_655 . . . ? 
O6 Eu1 N4 C38 -107.7(4) . . . . ? 
O5 Eu1 N4 C38 -55.9(4) . . . . ? 
N3 Eu1 N4 C38 -178.1(5) . . . . ? 
O2 Eu1 N4 C38 83.7(5) . . . . ? 
Eu1 Eu1 N4 C38 50.0(5) 2_766 . . . ? 
O2 Eu1 N4 C39 156.1(4) 2_766 . . . ? 
O4 Eu1 N4 C39 0.4(5) 2_666 . . . ? 
O1 Eu1 N4 C39 -70.1(4) . . . . ? 
O3 Eu1 N4 C39 -154.3(4) 1_655 . . . ? 
O6 Eu1 N4 C39 72.5(4) . . . . ? 
O5 Eu1 N4 C39 124.3(4) . . . . ? 
N3 Eu1 N4 C39 2.1(4) . . . . ? 
O2 Eu1 N4 C39 -96.1(4) . . . . ? 
Eu1 Eu1 N4 C39 -129.9(4) 2_766 . . . ? 
C31 N3 C27 C28 3.0(9) . . . . ? 
Eu1 N3 C27 C28 -178.3(5) . . . . ? 
C10 N1 C9 C8 0.1(9) . . . . ? 
C12 C8 C9 N1 -0.6(9) . . . . ? 
C7 C8 C9 N1 -176.9(5) . . . . ? 
O2 C1 O1 Eu1 -8.9(6) . . . . ? 
C2 C1 O1 Eu1 165.5(4) . . . . ? 
O2 Eu1 O1 C1 2.2(4) 2_766 . . . ? 
O4 Eu1 O1 C1 72.4(4) 2_666 . . . ? 
O3 Eu1 O1 C1 -64.7(4) 1_655 . . . ? 
O6 Eu1 O1 C1 148.4(3) . . . . ? 
O5 Eu1 O1 C1 -121.8(4) . . . . ? 
N4 Eu1 O1 C1 -145.0(4) . . . . ? 
N3 Eu1 O1 C1 148.4(4) . . . . ? 
O2 Eu1 O1 C1 4.6(3) . . . . ? 
Eu1 Eu1 O1 C1 3.5(4) 2_766 . . . ? 
C18 C19 C15 C16 0.1(8) . . . . ? 
C18 C19 C15 C14 -174.5(5) . . . . ? 
O6 C14 C15 C16 -158.6(5) . . . . ? 
O5 C14 C15 C16 17.5(8) . . . . ? 
O6 C14 C15 C19 15.9(8) . . . . ? 
O5 C14 C15 C19 -168.0(5) . . . . ? 
C2 C3 C4 C5 0.9(10) . . . . ? 
N3 C31 C30 C29 0.0(9) . . . . ? 
C39 C31 C30 C29 177.7(5) . . . . ? 
N3 C31 C30 C32 179.9(5) . . . . ? 
C39 C31 C30 C32 -2.4(9) . . . . ? 
C34 C32 C30 C29 -179.0(7) . . . . ? 
C34 C32 C30 C31 1.1(10) . . . . ? 
N3 C27 C28 C29 -0.4(10) . . . . ? 
C3 C4 C5 C6 0.2(10) . . . . ? 
C27 C28 C29 C30 -2.4(10) . . . . ? 
C31 C30 C29 C28 2.6(9) . . . . ? 
C32 C30 C29 C28 -177.3(6) . . . . ? 
N4 C39 C35 C36 0.1(9) . . . . ? 
C31 C39 C35 C36 -179.7(6) . . . . ? 
N4 C39 C35 C34 177.2(5) . . . . ? 
C31 C39 C35 C34 -2.7(9) . . . . ? 
C32 C34 C35 C36 178.2(7) . . . . ? 
C32 C34 C35 C39 1.3(10) . . . . ? 
C19 C15 C16 N2 -0.3(10) . . . . ? 
C14 C15 C16 N2 174.4(6) . . . . ? 
N4 C38 C37 C36 -1.5(10) . . . . ? 
C21 C20 C25 C24 2.2(9) . . . . ? 
C18 C20 C25 C24 -175.6(6) . . . . ? 
C21 C20 C25 C26 -177.4(6) . . . . ? 
C18 C20 C25 C26 4.8(10) . . . . ? 
C23 C24 C25 C20 -0.5(10) . . . . ? 
C23 C24 C25 C26 179.1(6) . . . . ? 
O8 C26 C25 C20 -174.6(7) . . . . ? 
O7 C26 C25 C20 15.1(11) . . . . ? 
O8 C26 C25 C24 5.8(11) . . . . ? 
O7 C26 C25 C24 -164.5(7) . . . . ? 
C15 C16 N2 C17 -0.4(10) . . . . ? 
C38 C37 C36 C35 -0.9(10) . . . . ? 
C39 C35 C36 C37 1.5(10) . . . . ? 
C34 C35 C36 C37 -175.4(6) . . . . ? 
C21 C22 C23 C24 3.3(10) . . . . ? 
C25 C24 C23 C22 -2.2(10) . . . . ? 
C25 C20 C21 C22 -1.1(10) . . . . ? 
C18 C20 C21 C22 176.9(6) . . . . ? 
C23 C22 C21 C20 -1.7(11) . . . . ? 
C2 C7 C6 C5 0.0(10) . . . . ? 
C8 C7 C6 C5 -177.7(6) . . . . ? 
C4 C5 C6 C7 -0.6(11) . . . . ? 
C15 C19 C18 C17 0.6(8) . . . . ? 
C15 C19 C18 C20 175.3(5) . . . . ? 
C21 C20 C18 C17 71.7(8) . . . . ? 
C25 C20 C18 C17 -110.4(7) . . . . ? 
C21 C20 C18 C19 -102.8(7) . . . . ? 
C25 C20 C18 C19 75.1(8) . . . . ? 
C16 N2 C17 C18 1.2(10) . . . . ? 
C19 C18 C17 N2 -1.4(10) . . . . ? 
C20 C18 C17 N2 -176.1(6) . . . . ? 
 
loop_ 
 _geom_hbond_atom_site_label_D 
 _geom_hbond_atom_site_label_H 
 _geom_hbond_atom_site_label_A 
 _geom_hbond_distance_DH 
 _geom_hbond_distance_HA 
 _geom_hbond_distance_DA 
 _geom_hbond_angle_DHA 
 _geom_hbond_site_symmetry_A 
O9 H2W N2  0.85 2.02 2.869(8) 178.8 2_766 
O9 H1W O10  0.83 2.52 2.913(10) 110.3 . 
O10 H4W O9  0.82 2.10 2.913(10) 170.1 . 
O10 H3W O6  0.82 2.10 2.921(8) 178.7 2_666 
O7 H7 N1  0.82 1.93 2.729(7) 164.9 2_656 
 
_diffrn_measured_fraction_theta_max    0.979 
_diffrn_reflns_theta_full              25.50 
_diffrn_measured_fraction_theta_full   0.979 
_refine_diff_density_max    1.994 
_refine_diff_density_min   -1.698 
_refine_diff_density_rms    0.142 

#===END
 
data_p-1 (Compound 12)
 
_audit_creation_method            SHELXL-97 
_chemical_name_systematic 
; 
 ? 
; 
_chemical_name_common             ? 
_chemical_melting_point           ? 
_chemical_formula_moiety          ? 
_chemical_formula_sum 
 'C38 H27 Gd N4 O10' 
_chemical_formula_weight          856.89 
 
loop_ 
 _atom_type_symbol 
 _atom_type_description 
 _atom_type_scat_dispersion_real 
 _atom_type_scat_dispersion_imag 
 _atom_type_scat_source 
 'C'  'C'   0.0033   0.0016 
 'International Tables Vol C Tables 4.2.6.8 and 6.1.1.4' 
 'H'  'H'   0.0000   0.0000 
 'International Tables Vol C Tables 4.2.6.8 and 6.1.1.4' 
 'Gd'  'Gd'  -0.1653   3.9035 
 'International Tables Vol C Tables 4.2.6.8 and 6.1.1.4' 
 'N'  'N'   0.0061   0.0033 
 'International Tables Vol C Tables 4.2.6.8 and 6.1.1.4' 
 'O'  'O'   0.0106   0.0060 
 'International Tables Vol C Tables 4.2.6.8 and 6.1.1.4' 
 
_symmetry_cell_setting            Triclinic 
_symmetry_space_group_name_H-M    P-1 
 
loop_ 
 _symmetry_equiv_pos_as_xyz 
 'x, y, z' 
 '-x, -y, -z' 
 
_cell_length_a                    9.141(3) 
_cell_length_b                    13.712(4) 
_cell_length_c                    14.123(5) 
_cell_angle_alpha                 97.311(3) 
_cell_angle_beta                  96.607(3) 
_cell_angle_gamma                 105.351(3) 
_cell_volume                      1672.6(9) 
_cell_formula_units_Z             2 
_cell_measurement_temperature     293(2) 
_cell_measurement_reflns_used     ? 
_cell_measurement_theta_min       ? 
_cell_measurement_theta_max       ? 
 
_exptl_crystal_description        block
_exptl_crystal_colour             colourless
_exptl_crystal_size_max           0.28 
_exptl_crystal_size_mid           0.26 
_exptl_crystal_size_min           0.24 
_exptl_crystal_density_meas       ? 
_exptl_crystal_density_diffrn     1.701 
_exptl_crystal_density_method     'not measured' 
_exptl_crystal_F_000              854 
_exptl_absorpt_coefficient_mu     2.052 
_exptl_absorpt_correction_type    multi-scan  
_exptl_absorpt_correction_T_min   0.5973 
_exptl_absorpt_correction_T_max   0.6387 
_exptl_absorpt_process_details    ? 
 
_exptl_special_details 
; 
 ? 
; 
 
_diffrn_ambient_temperature       293(2) 
_diffrn_radiation_wavelength      0.71073 
_diffrn_radiation_type            MoK\a 
_diffrn_radiation_source          'fine-focus sealed tube' 
_diffrn_radiation_monochromator   graphite 
_diffrn_measurement_device_type   'Bruker APEX-II CCD'  
_diffrn_measurement_method        '\f and \w scans' 
_diffrn_detector_area_resol_mean  ? 
_diffrn_reflns_number             12091 
_diffrn_reflns_av_R_equivalents   0.0324 
_diffrn_reflns_av_sigmaI/netI     0.0529 
_diffrn_reflns_limit_h_min        -11 
_diffrn_reflns_limit_h_max        11 
_diffrn_reflns_limit_k_min        -15 
_diffrn_reflns_limit_k_max        16 
_diffrn_reflns_limit_l_min        -17 
_diffrn_reflns_limit_l_max        15 
_diffrn_reflns_theta_min          2.32 
_diffrn_reflns_theta_max          25.50 
_reflns_number_total              6130 
_reflns_number_gt                 5301 
_reflns_threshold_expression      >2sigma(I) 
 
_computing_data_collection        'Bruker APEX2' 
_computing_cell_refinement        'Bruker SAINT' 
_computing_data_reduction         'Bruker SAINT' 
_computing_structure_solution     'SHELXS-97 (Sheldrick, 2008)' 
_computing_structure_refinement   'SHELXL-97 (Sheldrick, 2008)' 
_computing_molecular_graphics     'Bruker SHELXTL'  
_computing_publication_material   'Bruker SHELXTL'  
 
_refine_special_details 
; 
 Refinement of F^2^ against ALL reflections.  The weighted R-factor wR and 
 goodness of fit S are based on F^2^, conventional R-factors R are based 
 on F, with F set to zero for negative F^2^. The threshold expression of 
 F^2^ > 2sigma(F^2^) is used only for calculating R-factors(gt) etc. and is 
 not relevant to the choice of reflections for refinement.  R-factors based 
 on F^2^ are statistically about twice as large as those based on F, and R- 
 factors based on ALL data will be even larger. 
; 
 
_refine_ls_structure_factor_coef  Fsqd  
_refine_ls_matrix_type            full 
_refine_ls_weighting_scheme       calc  
_refine_ls_weighting_details 
 'calc w=1/[\s^2^(Fo^2^)+(0.0560P)^2^+0.0000P] where P=(Fo^2^+2Fc^2^)/3' 
_atom_sites_solution_primary      direct 
_atom_sites_solution_secondary    difmap 
_atom_sites_solution_hydrogens    geom 
_refine_ls_hydrogen_treatment     mixed  
_refine_ls_extinction_method      none 
_refine_ls_extinction_coef        ? 
_refine_ls_number_reflns          6130 
_refine_ls_number_parameters      483 
_refine_ls_number_restraints      1 
_refine_ls_R_factor_all           0.0445 
_refine_ls_R_factor_gt            0.0355 
_refine_ls_wR_factor_ref          0.0942 
_refine_ls_wR_factor_gt           0.0882 
_refine_ls_goodness_of_fit_ref    1.030 
_refine_ls_restrained_S_all       1.031 
_refine_ls_shift/su_max           0.001 
_refine_ls_shift/su_mean          0.000 
 
loop_ 
 _atom_site_label 
 _atom_site_type_symbol 
 _atom_site_fract_x 
 _atom_site_fract_y 
 _atom_site_fract_z 
 _atom_site_U_iso_or_equiv 
 _atom_site_adp_type 
 _atom_site_occupancy 
 _atom_site_symmetry_multiplicity 
 _atom_site_calc_flag 
 _atom_site_refinement_flags 
 _atom_site_disorder_assembly 
 _atom_site_disorder_group 
Gd1 Gd 0.87262(2) 0.860239(16) 0.012067(15) 0.02281(9) Uani 1 1 d . . . 
O2 O 0.7265(3) 0.8690(3) -0.1362(2) 0.0354(8) Uani 1 1 d . . . 
O1 O 0.9062(3) 1.0149(3) -0.0977(2) 0.0353(8) Uani 1 1 d . . . 
O6 O 0.8316(3) 0.7907(3) 0.1618(2) 0.0326(7) Uani 1 1 d . . . 
O5 O 1.0180(4) 0.7562(3) 0.0921(2) 0.0382(8) Uani 1 1 d . . . 
O4 O 0.0605(3) 0.8537(2) -0.0924(2) 0.0314(7) Uani 1 1 d . . . 
O3 O 0.2182(3) 1.0094(2) -0.0923(2) 0.0334(8) Uani 1 1 d . . . 
O8 O 0.6290(6) 0.4262(4) 0.4475(5) 0.0977(19) Uani 1 1 d . . . 
O7 O 0.8274(6) 0.4816(4) 0.3736(4) 0.0658(14) Uani 1 1 d . . . 
N3 N 0.5820(4) 0.7699(3) 0.0023(3) 0.0314(9) Uani 1 1 d . . . 
N4 N 0.7734(4) 0.6733(3) -0.0757(3) 0.0311(9) Uani 1 1 d . . . 
C5 C 0.7191(7) 0.9833(5) -0.4536(4) 0.0524(15) Uani 1 1 d . . . 
H5 H 0.7050 0.9855 -0.5194 0.063 Uiso 1 1 calc R . . 
C25 C 0.7948(6) 0.5920(4) 0.5073(4) 0.0442(13) Uani 1 1 d . . . 
C22 C 0.8808(8) 0.7602(5) 0.6537(4) 0.0573(16) Uani 1 1 d . . . 
H22 H 0.9118 0.8164 0.7032 0.069 Uiso 1 1 calc R . . 
C32 C 0.3094(7) 0.5170(5) -0.0985(5) 0.0609(18) Uani 1 1 d . . . 
H32 H 0.2065 0.4817 -0.1016 0.073 Uiso 1 1 calc R . . 
C31 C 0.5218(5) 0.6717(4) -0.0439(3) 0.0311(11) Uani 1 1 d . . . 
C2 C 0.7618(5) 0.9722(3) -0.2581(3) 0.0279(10) Uani 1 1 d . . . 
C38 C 0.8656(6) 0.6247(4) -0.1128(4) 0.0393(12) Uani 1 1 d . . . 
H38 H 0.9699 0.6588 -0.1039 0.047 Uiso 1 1 calc R . . 
C8 C 0.4756(5) 0.8757(4) -0.2734(3) 0.0272(10) Uani 1 1 d . . . 
C11 C 0.2653(5) 0.8670(3) -0.1836(3) 0.0268(10) Uani 1 1 d . . . 
C7 C 0.6137(5) 0.9307(4) -0.3127(3) 0.0277(10) Uani 1 1 d . . . 
C14 C 0.9495(5) 0.7589(3) 0.1641(3) 0.0287(10) Uani 1 1 d . . . 
C1 C 0.7979(5) 0.9515(3) -0.1576(3) 0.0259(10) Uani 1 1 d . . . 
C24 C 0.7216(7) 0.5938(5) 0.5883(4) 0.0536(15) Uani 1 1 d . . . 
H24 H 0.6429 0.5369 0.5939 0.064 Uiso 1 1 calc R . . 
C12 C 0.3972(5) 0.9240(4) -0.2129(3) 0.0292(10) Uani 1 1 d . . . 
H12 H 0.4330 0.9944 -0.1920 0.035 Uiso 1 1 calc R . . 
C35 C 0.6216(5) 0.6218(4) -0.0865(3) 0.0325(11) Uani 1 1 d . . . 
C19 C 0.9263(6) 0.7091(4) 0.3286(4) 0.0346(11) Uani 1 1 d . . . 
H19 H 0.8246 0.7108 0.3215 0.042 Uiso 1 1 calc R . . 
C13 C 0.1748(5) 0.9144(4) -0.1177(3) 0.0283(10) Uani 1 1 d . . . 
C27 C 0.4887(5) 0.8166(4) 0.0400(4) 0.0407(12) Uani 1 1 d . . . 
H27 H 0.5287 0.8850 0.0687 0.049 Uiso 1 1 calc R . . 
C15 C 1.0107(5) 0.7271(4) 0.2542(4) 0.0324(11) Uani 1 1 d . . . 
N1 N 0.2881(5) 0.7145(3) -0.2774(3) 0.0400(10) Uani 1 1 d . . . 
C3 C 0.8827(5) 1.0186(4) -0.3022(4) 0.0345(11) Uani 1 1 d . . . 
H3 H 0.9798 1.0461 -0.2656 0.041 Uiso 1 1 calc R . . 
C30 C 0.3647(5) 0.6188(4) -0.0489(4) 0.0430(13) Uani 1 1 d . . . 
N2 N 1.2295(5) 0.7039(4) 0.3491(4) 0.0561(13) Uani 1 1 d . . . 
C36 C 0.6641(7) 0.4735(4) -0.1772(4) 0.0541(15) Uani 1 1 d . . . 
H36 H 0.6286 0.4075 -0.2124 0.065 Uiso 1 1 calc R . . 
C9 C 0.4152(5) 0.7709(4) -0.3036(4) 0.0371(12) Uani 1 1 d . . . 
H9 H 0.4662 0.7379 -0.3447 0.045 Uiso 1 1 calc R . . 
C10 C 0.2170(5) 0.7628(4) -0.2182(4) 0.0356(11) Uani 1 1 d . . . 
H10 H 0.1292 0.7239 -0.1988 0.043 Uiso 1 1 calc R . . 
C33 C 0.4024(7) 0.4693(5) -0.1419(5) 0.0614(18) Uani 1 1 d . . . 
H33 H 0.3622 0.4027 -0.1752 0.074 Uiso 1 1 calc R . . 
C20 C 0.9121(6) 0.6782(4) 0.4996(4) 0.0375(12) Uani 1 1 d . . . 
C18 C 0.9943(6) 0.6888(4) 0.4136(4) 0.0387(12) Uani 1 1 d . . . 
C16 C 1.1606(6) 0.7230(4) 0.2680(4) 0.0435(13) Uani 1 1 d . . . 
H16 H 1.2170 0.7343 0.2177 0.052 Uiso 1 1 calc R . . 
C17 C 1.1457(7) 0.6881(5) 0.4199(4) 0.0527(15) Uani 1 1 d . . . 
H17 H 1.1925 0.6757 0.4774 0.063 Uiso 1 1 calc R . . 
C21 C 0.9534(7) 0.7599(4) 0.5739(4) 0.0538(15) Uani 1 1 d . . . 
H21 H 1.0332 0.8169 0.5701 0.065 Uiso 1 1 calc R . . 
C26 C 0.7409(7) 0.4949(5) 0.4370(5) 0.0567(16) Uani 1 1 d . . . 
C4 C 0.8637(6) 1.0253(4) -0.3981(4) 0.0465(14) Uani 1 1 d . . . 
H4 H 0.9467 1.0576 -0.4262 0.056 Uiso 1 1 calc R . . 
C6 C 0.5972(6) 0.9385(5) -0.4098(4) 0.0462(14) Uani 1 1 d . . . 
H6 H 0.5003 0.9125 -0.4468 0.055 Uiso 1 1 calc R . . 
C37 C 0.8159(7) 0.5254(4) -0.1645(4) 0.0487(14) Uani 1 1 d . . . 
H37 H 0.8855 0.4949 -0.1900 0.058 Uiso 1 1 calc R . . 
C34 C 0.5615(6) 0.5208(4) -0.1366(4) 0.0442(13) Uani 1 1 d . . . 
C23 C 0.7630(7) 0.6775(5) 0.6596(4) 0.0548(15) Uani 1 1 d . . . 
H23 H 0.7106 0.6780 0.7123 0.066 Uiso 1 1 calc R . . 
C29 C 0.2742(6) 0.6706(5) -0.0034(4) 0.0508(16) Uani 1 1 d . . . 
H29 H 0.1718 0.6370 -0.0025 0.061 Uiso 1 1 calc R . . 
C28 C 0.3329(6) 0.7695(5) 0.0397(4) 0.0466(14) Uani 1 1 d . . . 
H28 H 0.2715 0.8052 0.0683 0.056 Uiso 1 1 calc R . . 
O9 O 0.4591(6) 0.3008(5) 0.6092(4) 0.0948(18) Uani 1 1 d . . . 
H1W H 0.5519 0.2999 0.6213 0.114 Uiso 1 1 d R . . 
H2W H 0.4443 0.2501 0.6372 0.114 Uiso 1 1 d R . . 
O10 O 0.3464(14) 0.1278(7) 0.7052(8) 0.203(6) Uani 1 1 d D . . 
H3W H 0.2952 0.1514 0.7443 0.243 Uiso 1 1 d R . . 
H4W H 0.2939 0.1496 0.6720 0.25(9) Uiso 1 1 d RD . . 
H7 H 0.796(10) 0.430(7) 0.345(7) 0.12(4) Uiso 1 1 d . . . 
 
loop_ 
 _atom_site_aniso_label 
 _atom_site_aniso_U_11 
 _atom_site_aniso_U_22 
 _atom_site_aniso_U_33 
 _atom_site_aniso_U_23 
 _atom_site_aniso_U_13 
 _atom_site_aniso_U_12 
Gd1 0.02088(12) 0.02296(13) 0.02214(13) 0.00098(9) 0.00441(8) 0.00286(8) 
O2 0.0308(16) 0.040(2) 0.0278(18) 0.0113(15) -0.0022(13) -0.0019(14) 
O1 0.0264(16) 0.041(2) 0.0270(17) -0.0085(15) -0.0009(13) -0.0005(14) 
O6 0.0310(17) 0.0382(19) 0.0334(19) 0.0130(15) 0.0078(14) 0.0135(14) 
O5 0.0358(18) 0.052(2) 0.0327(19) 0.0081(17) 0.0106(15) 0.0192(16) 
O4 0.0309(16) 0.0292(17) 0.0332(18) 0.0010(14) 0.0130(14) 0.0057(14) 
O3 0.0326(17) 0.0258(17) 0.0380(19) -0.0053(15) 0.0126(14) 0.0039(14) 
O8 0.075(3) 0.074(4) 0.120(5) -0.034(3) 0.036(3) -0.005(3) 
O7 0.092(3) 0.037(2) 0.061(3) -0.006(2) 0.039(3) 0.001(2) 
N3 0.0243(19) 0.037(2) 0.030(2) 0.0054(18) 0.0061(16) 0.0029(17) 
N4 0.034(2) 0.026(2) 0.031(2) 0.0037(17) 0.0044(17) 0.0055(17) 
C5 0.065(4) 0.070(4) 0.028(3) 0.016(3) 0.016(3) 0.021(3) 
C25 0.051(3) 0.043(3) 0.040(3) -0.003(3) 0.004(2) 0.022(3) 
C22 0.082(4) 0.056(4) 0.038(3) -0.004(3) 0.002(3) 0.036(3) 
C32 0.040(3) 0.049(4) 0.075(5) 0.015(3) -0.008(3) -0.015(3) 
C31 0.028(2) 0.034(3) 0.027(2) 0.012(2) 0.0006(19) 0.001(2) 
C2 0.032(2) 0.024(2) 0.025(2) 0.0018(19) 0.0058(19) 0.0039(18) 
C38 0.043(3) 0.037(3) 0.041(3) 0.010(2) 0.011(2) 0.012(2) 
C8 0.028(2) 0.034(3) 0.020(2) 0.0051(19) -0.0005(18) 0.0110(19) 
C11 0.027(2) 0.030(2) 0.025(2) 0.0026(19) 0.0057(18) 0.0101(18) 
C7 0.027(2) 0.034(3) 0.024(2) 0.004(2) 0.0072(18) 0.0117(19) 
C14 0.027(2) 0.020(2) 0.033(3) 0.0007(19) 0.0028(19) -0.0003(18) 
C1 0.020(2) 0.030(2) 0.026(2) 0.002(2) 0.0035(17) 0.0061(18) 
C24 0.052(3) 0.059(4) 0.051(4) 0.010(3) 0.016(3) 0.015(3) 
C12 0.027(2) 0.031(2) 0.026(2) 0.000(2) 0.0048(18) 0.0051(19) 
C35 0.035(2) 0.029(3) 0.028(3) 0.008(2) -0.001(2) 0.001(2) 
C19 0.041(3) 0.030(3) 0.035(3) 0.006(2) 0.005(2) 0.013(2) 
C13 0.027(2) 0.031(3) 0.024(2) -0.002(2) 0.0027(18) 0.0068(19) 
C27 0.034(3) 0.044(3) 0.043(3) 0.003(3) 0.012(2) 0.009(2) 
C15 0.040(3) 0.026(2) 0.032(3) 0.005(2) 0.004(2) 0.012(2) 
N1 0.043(2) 0.029(2) 0.046(3) -0.002(2) 0.017(2) 0.0057(18) 
C3 0.037(3) 0.029(3) 0.033(3) 0.002(2) 0.014(2) 0.001(2) 
C30 0.029(2) 0.045(3) 0.049(3) 0.017(3) -0.001(2) -0.001(2) 
N2 0.050(3) 0.080(4) 0.051(3) 0.019(3) 0.008(2) 0.037(3) 
C36 0.074(4) 0.030(3) 0.050(4) -0.005(3) -0.001(3) 0.009(3) 
C9 0.035(3) 0.043(3) 0.037(3) 0.002(2) 0.015(2) 0.017(2) 
C10 0.036(3) 0.033(3) 0.037(3) 0.001(2) 0.016(2) 0.005(2) 
C33 0.054(4) 0.035(3) 0.073(5) -0.001(3) -0.012(3) -0.010(3) 
C20 0.053(3) 0.036(3) 0.028(3) 0.009(2) 0.002(2) 0.021(2) 
C18 0.051(3) 0.031(3) 0.035(3) 0.005(2) 0.006(2) 0.014(2) 
C16 0.044(3) 0.055(3) 0.041(3) 0.016(3) 0.010(2) 0.024(3) 
C17 0.063(4) 0.065(4) 0.038(3) 0.011(3) 0.002(3) 0.033(3) 
C21 0.077(4) 0.038(3) 0.044(3) 0.003(3) 0.007(3) 0.017(3) 
C26 0.054(4) 0.047(4) 0.061(4) -0.010(3) 0.012(3) 0.009(3) 
C4 0.051(3) 0.045(3) 0.042(3) 0.008(3) 0.023(3) 0.003(3) 
C6 0.036(3) 0.071(4) 0.031(3) 0.011(3) 0.002(2) 0.014(3) 
C37 0.068(4) 0.033(3) 0.047(3) -0.003(3) 0.012(3) 0.020(3) 
C34 0.055(3) 0.030(3) 0.040(3) 0.004(2) -0.003(3) 0.004(2) 
C23 0.068(4) 0.072(4) 0.034(3) 0.010(3) 0.016(3) 0.033(3) 
C29 0.024(2) 0.066(4) 0.061(4) 0.030(3) 0.007(2) 0.001(3) 
C28 0.032(3) 0.062(4) 0.048(3) 0.015(3) 0.013(2) 0.012(3) 
O9 0.067(3) 0.126(5) 0.104(4) 0.042(4) 0.010(3) 0.039(3) 
O10 0.340(14) 0.214(11) 0.192(9) 0.128(9) 0.192(9) 0.205(12) 
 
_geom_special_details 
; 
 All esds (except the esd in the dihedral angle between two l.s. planes) 
 are estimated using the full covariance matrix.  The cell esds are taken 
 into account individually in the estimation of esds in distances, angles 
 and torsion angles; correlations between esds in cell parameters are only 
 used when they are defined by crystal symmetry.  An approximate (isotropic) 
 treatment of cell esds is used for estimating esds involving l.s. planes. 
; 
 
loop_ 
 _geom_bond_atom_site_label_1 
 _geom_bond_atom_site_label_2 
 _geom_bond_distance 
 _geom_bond_site_symmetry_2 
 _geom_bond_publ_flag 
Gd1 O1 2.358(3) 2_775 ? 
Gd1 O3 2.378(3) 2_675 ? 
Gd1 O2 2.385(3) . ? 
Gd1 O4 2.402(3) 1_655 ? 
Gd1 O6 2.455(3) . ? 
Gd1 O5 2.480(3) . ? 
Gd1 N4 2.575(4) . ? 
Gd1 N3 2.597(4) . ? 
Gd1 O1 2.756(4) . ? 
Gd1 Gd1 4.0024(10) 2_775 ? 
O2 C1 1.240(5) . ? 
O1 C1 1.272(5) . ? 
O1 Gd1 2.358(3) 2_775 ? 
O6 C14 1.264(5) . ? 
O5 C14 1.256(6) . ? 
O4 C13 1.270(5) . ? 
O4 Gd1 2.402(3) 1_455 ? 
O3 C13 1.248(5) . ? 
O3 Gd1 2.378(3) 2_675 ? 
O8 C26 1.232(7) . ? 
O7 C26 1.288(8) . ? 
O7 H7 0.73(9) . ? 
N3 C27 1.314(6) . ? 
N3 C31 1.357(6) . ? 
N4 C38 1.318(6) . ? 
N4 C35 1.361(6) . ? 
C5 C6 1.376(7) . ? 
C5 C4 1.391(8) . ? 
C5 H5 0.9300 . ? 
C25 C24 1.390(8) . ? 
C25 C20 1.395(7) . ? 
C25 C26 1.485(8) . ? 
C22 C23 1.360(9) . ? 
C22 C21 1.372(8) . ? 
C22 H22 0.9300 . ? 
C32 C33 1.355(9) . ? 
C32 C30 1.411(8) . ? 
C32 H32 0.9300 . ? 
C31 C30 1.416(6) . ? 
C31 C35 1.420(7) . ? 
C2 C3 1.379(6) . ? 
C2 C7 1.411(6) . ? 
C2 C1 1.499(6) . ? 
C38 C37 1.393(7) . ? 
C38 H38 0.9300 . ? 
C8 C9 1.386(7) . ? 
C8 C12 1.389(6) . ? 
C8 C7 1.494(6) . ? 
C11 C10 1.384(6) . ? 
C11 C12 1.391(6) . ? 
C11 C13 1.510(6) . ? 
C7 C6 1.382(7) . ? 
C14 C15 1.493(7) . ? 
C24 C23 1.365(9) . ? 
C24 H24 0.9300 . ? 
C12 H12 0.9300 . ? 
C35 C34 1.407(7) . ? 
C19 C15 1.382(7) . ? 
C19 C18 1.383(7) . ? 
C19 H19 0.9300 . ? 
C27 C28 1.399(7) . ? 
C27 H27 0.9300 . ? 
C15 C16 1.379(7) . ? 
N1 C10 1.330(6) . ? 
N1 C9 1.335(6) . ? 
C3 C4 1.363(7) . ? 
C3 H3 0.9300 . ? 
C30 C29 1.386(8) . ? 
N2 C16 1.332(7) . ? 
N2 C17 1.333(7) . ? 
C36 C37 1.360(8) . ? 
C36 C34 1.407(8) . ? 
C36 H36 0.9300 . ? 
C9 H9 0.9300 . ? 
C10 H10 0.9300 . ? 
C33 C34 1.428(8) . ? 
C33 H33 0.9300 . ? 
C20 C21 1.373(7) . ? 
C20 C18 1.503(7) . ? 
C18 C17 1.379(8) . ? 
C16 H16 0.9300 . ? 
C17 H17 0.9300 . ? 
C21 H21 0.9300 . ? 
C4 H4 0.9300 . ? 
C6 H6 0.9300 . ? 
C37 H37 0.9300 . ? 
C23 H23 0.9300 . ? 
C29 C28 1.351(8) . ? 
C29 H29 0.9300 . ? 
C28 H28 0.9300 . ? 
O9 H1W 0.8495 . ? 
O9 H2W 0.8304 . ? 
O10 H3W 0.8502 . ? 
O10 H4W 0.7739 . ? 
 
loop_ 
 _geom_angle_atom_site_label_1 
 _geom_angle_atom_site_label_2 
 _geom_angle_atom_site_label_3 
 _geom_angle 
 _geom_angle_site_symmetry_1 
 _geom_angle_site_symmetry_3 
 _geom_angle_publ_flag 
O1 Gd1 O3 74.44(11) 2_775 2_675 ? 
O1 Gd1 O2 126.89(11) 2_775 . ? 
O3 Gd1 O2 89.59(12) 2_675 . ? 
O1 Gd1 O4 77.34(11) 2_775 1_655 ? 
O3 Gd1 O4 136.00(11) 2_675 1_655 ? 
O2 Gd1 O4 81.11(12) . 1_655 ? 
O1 Gd1 O6 89.07(11) 2_775 . ? 
O3 Gd1 O6 81.34(11) 2_675 . ? 
O2 Gd1 O6 139.00(11) . . ? 
O4 Gd1 O6 131.28(11) 1_655 . ? 
O1 Gd1 O5 77.18(12) 2_775 . ? 
O3 Gd1 O5 125.58(11) 2_675 . ? 
O2 Gd1 O5 143.65(12) . . ? 
O4 Gd1 O5 78.66(11) 1_655 . ? 
O6 Gd1 O5 52.65(11) . . ? 
O1 Gd1 N4 143.18(12) 2_775 . ? 
O3 Gd1 N4 140.37(11) 2_675 . ? 
O2 Gd1 N4 75.39(12) . . ? 
O4 Gd1 N4 78.42(11) 1_655 . ? 
O6 Gd1 N4 86.50(12) . . ? 
O5 Gd1 N4 71.17(12) . . ? 
O1 Gd1 N3 147.60(12) 2_775 . ? 
O3 Gd1 N3 77.26(12) 2_675 . ? 
O2 Gd1 N3 67.75(11) . . ? 
O4 Gd1 N3 134.95(11) 1_655 . ? 
O6 Gd1 N3 71.25(11) . . ? 
O5 Gd1 N3 107.78(12) . . ? 
N4 Gd1 N3 63.11(12) . . ? 
O1 Gd1 O1 77.28(11) 2_775 . ? 
O3 Gd1 O1 72.63(11) 2_675 . ? 
O2 Gd1 O1 49.65(10) . . ? 
O4 Gd1 O1 68.68(10) 1_655 . ? 
O6 Gd1 O1 152.98(11) . . ? 
O5 Gd1 O1 142.06(10) . . ? 
N4 Gd1 O1 118.28(11) . . ? 
N3 Gd1 O1 108.87(11) . . ? 
O1 Gd1 Gd1 42.20(9) 2_775 2_775 ? 
O3 Gd1 Gd1 68.68(8) 2_675 2_775 ? 
O2 Gd1 Gd1 84.71(8) . 2_775 ? 
O4 Gd1 Gd1 67.69(8) 1_655 2_775 ? 
O6 Gd1 Gd1 127.15(8) . 2_775 ? 
O5 Gd1 Gd1 114.36(8) . 2_775 ? 
N4 Gd1 Gd1 142.93(9) . 2_775 ? 
N3 Gd1 Gd1 136.06(9) . 2_775 ? 
O1 Gd1 Gd1 35.07(6) . 2_775 ? 
C1 O2 Gd1 103.6(3) . . ? 
C1 O1 Gd1 169.5(3) . 2_775 ? 
C1 O1 Gd1 85.1(3) . . ? 
Gd1 O1 Gd1 102.73(11) 2_775 . ? 
C14 O6 Gd1 93.1(3) . . ? 
C14 O5 Gd1 92.2(3) . . ? 
C13 O4 Gd1 138.7(3) . 1_455 ? 
C13 O3 Gd1 138.3(3) . 2_675 ? 
C26 O7 H7 109(8) . . ? 
C27 N3 C31 118.0(4) . . ? 
C27 N3 Gd1 122.1(3) . . ? 
C31 N3 Gd1 119.9(3) . . ? 
C38 N4 C35 117.7(4) . . ? 
C38 N4 Gd1 121.9(3) . . ? 
C35 N4 Gd1 120.4(3) . . ? 
C6 C5 C4 119.2(5) . . ? 
C6 C5 H5 120.4 . . ? 
C4 C5 H5 120.4 . . ? 
C24 C25 C20 118.7(5) . . ? 
C24 C25 C26 115.4(5) . . ? 
C20 C25 C26 125.9(5) . . ? 
C23 C22 C21 119.4(6) . . ? 
C23 C22 H22 120.3 . . ? 
C21 C22 H22 120.3 . . ? 
C33 C32 C30 121.7(5) . . ? 
C33 C32 H32 119.2 . . ? 
C30 C32 H32 119.2 . . ? 
N3 C31 C30 121.7(5) . . ? 
N3 C31 C35 118.2(4) . . ? 
C30 C31 C35 120.1(5) . . ? 
C3 C2 C7 119.7(4) . . ? 
C3 C2 C1 117.9(4) . . ? 
C7 C2 C1 121.5(4) . . ? 
N4 C38 C37 123.8(5) . . ? 
N4 C38 H38 118.1 . . ? 
C37 C38 H38 118.1 . . ? 
C9 C8 C12 117.3(4) . . ? 
C9 C8 C7 118.5(4) . . ? 
C12 C8 C7 124.1(4) . . ? 
C10 C11 C12 117.1(4) . . ? 
C10 C11 C13 120.0(4) . . ? 
C12 C11 C13 122.9(4) . . ? 
C6 C7 C2 117.5(4) . . ? 
C6 C7 C8 118.1(4) . . ? 
C2 C7 C8 124.3(4) . . ? 
O5 C14 O6 120.6(4) . . ? 
O5 C14 C15 119.6(4) . . ? 
O6 C14 C15 119.7(4) . . ? 
O2 C1 O1 120.9(4) . . ? 
O2 C1 C2 118.8(4) . . ? 
O1 C1 C2 120.2(4) . . ? 
C23 C24 C25 121.3(6) . . ? 
C23 C24 H24 119.3 . . ? 
C25 C24 H24 119.3 . . ? 
C8 C12 C11 120.1(4) . . ? 
C8 C12 H12 120.0 . . ? 
C11 C12 H12 120.0 . . ? 
N4 C35 C34 122.4(5) . . ? 
N4 C35 C31 118.3(4) . . ? 
C34 C35 C31 119.3(4) . . ? 
C15 C19 C18 119.5(5) . . ? 
C15 C19 H19 120.3 . . ? 
C18 C19 H19 120.3 . . ? 
O3 C13 O4 125.4(4) . . ? 
O3 C13 C11 117.7(4) . . ? 
O4 C13 C11 116.9(4) . . ? 
N3 C27 C28 123.9(5) . . ? 
N3 C27 H27 118.1 . . ? 
C28 C27 H27 118.1 . . ? 
C16 C15 C19 118.0(5) . . ? 
C16 C15 C14 119.5(5) . . ? 
C19 C15 C14 122.3(4) . . ? 
C10 N1 C9 117.3(4) . . ? 
C4 C3 C2 121.8(5) . . ? 
C4 C3 H3 119.1 . . ? 
C2 C3 H3 119.1 . . ? 
C29 C30 C32 123.7(5) . . ? 
C29 C30 C31 117.4(5) . . ? 
C32 C30 C31 118.9(5) . . ? 
C16 N2 C17 116.6(5) . . ? 
C37 C36 C34 119.4(5) . . ? 
C37 C36 H36 120.3 . . ? 
C34 C36 H36 120.3 . . ? 
N1 C9 C8 123.9(4) . . ? 
N1 C9 H9 118.0 . . ? 
C8 C9 H9 118.0 . . ? 
N1 C10 C11 124.3(4) . . ? 
N1 C10 H10 117.9 . . ? 
C11 C10 H10 117.9 . . ? 
C32 C33 C34 120.4(5) . . ? 
C32 C33 H33 119.8 . . ? 
C34 C33 H33 119.8 . . ? 
C21 C20 C25 118.4(5) . . ? 
C21 C20 C18 117.4(5) . . ? 
C25 C20 C18 124.2(5) . . ? 
C17 C18 C19 117.5(5) . . ? 
C17 C18 C20 120.8(5) . . ? 
C19 C18 C20 121.4(5) . . ? 
N2 C16 C15 123.9(5) . . ? 
N2 C16 H16 118.0 . . ? 
C15 C16 H16 118.0 . . ? 
N2 C17 C18 124.4(5) . . ? 
N2 C17 H17 117.8 . . ? 
C18 C17 H17 117.8 . . ? 
C22 C21 C20 122.2(6) . . ? 
C22 C21 H21 118.9 . . ? 
C20 C21 H21 118.9 . . ? 
O8 C26 O7 122.2(6) . . ? 
O8 C26 C25 120.4(6) . . ? 
O7 C26 C25 116.8(5) . . ? 
C3 C4 C5 119.4(5) . . ? 
C3 C4 H4 120.3 . . ? 
C5 C4 H4 120.3 . . ? 
C5 C6 C7 122.4(5) . . ? 
C5 C6 H6 118.8 . . ? 
C7 C6 H6 118.8 . . ? 
C36 C37 C38 119.1(5) . . ? 
C36 C37 H37 120.5 . . ? 
C38 C37 H37 120.5 . . ? 
C36 C34 C35 117.6(5) . . ? 
C36 C34 C33 122.7(5) . . ? 
C35 C34 C33 119.6(5) . . ? 
C22 C23 C24 120.0(6) . . ? 
C22 C23 H23 120.0 . . ? 
C24 C23 H23 120.0 . . ? 
C28 C29 C30 120.8(5) . . ? 
C28 C29 H29 119.6 . . ? 
C30 C29 H29 119.6 . . ? 
C29 C28 C27 118.0(5) . . ? 
C29 C28 H28 121.0 . . ? 
C27 C28 H28 121.0 . . ? 
H1W O9 H2W 82.2 . . ? 
H3W O10 H4W 77.4 . . ? 
 
loop_ 
 _geom_torsion_atom_site_label_1 
 _geom_torsion_atom_site_label_2 
 _geom_torsion_atom_site_label_3 
 _geom_torsion_atom_site_label_4 
 _geom_torsion 
 _geom_torsion_site_symmetry_1 
 _geom_torsion_site_symmetry_2 
 _geom_torsion_site_symmetry_3 
 _geom_torsion_site_symmetry_4 
 _geom_torsion_publ_flag 
O1 Gd1 O2 C1 2.4(4) 2_775 . . . ? 
O3 Gd1 O2 C1 72.4(3) 2_675 . . . ? 
O4 Gd1 O2 C1 -64.4(3) 1_655 . . . ? 
O6 Gd1 O2 C1 148.7(3) . . . . ? 
O5 Gd1 O2 C1 -121.1(3) . . . . ? 
N4 Gd1 O2 C1 -144.6(3) . . . . ? 
N3 Gd1 O2 C1 148.8(3) . . . . ? 
O1 Gd1 O2 C1 5.1(3) . . . . ? 
Gd1 Gd1 O2 C1 3.8(3) 2_775 . . . ? 
O1 Gd1 O1 C1 172.9(3) 2_775 . . . ? 
O3 Gd1 O1 C1 -109.7(3) 2_675 . . . ? 
O2 Gd1 O1 C1 -4.9(2) . . . . ? 
O4 Gd1 O1 C1 91.7(3) 1_655 . . . ? 
O6 Gd1 O1 C1 -125.8(3) . . . . ? 
O5 Gd1 O1 C1 124.1(3) . . . . ? 
N4 Gd1 O1 C1 28.7(3) . . . . ? 
N3 Gd1 O1 C1 -40.3(3) . . . . ? 
Gd1 Gd1 O1 C1 172.9(3) 2_775 . . . ? 
O1 Gd1 O1 Gd1 0.0 2_775 . . 2_775 ? 
O3 Gd1 O1 Gd1 77.44(12) 2_675 . . 2_775 ? 
O2 Gd1 O1 Gd1 -177.73(19) . . . 2_775 ? 
O4 Gd1 O1 Gd1 -81.19(13) 1_655 . . 2_775 ? 
O6 Gd1 O1 Gd1 61.3(2) . . . 2_775 ? 
O5 Gd1 O1 Gd1 -48.7(2) . . . 2_775 ? 
N4 Gd1 O1 Gd1 -144.14(12) . . . 2_775 ? 
N3 Gd1 O1 Gd1 146.89(12) . . . 2_775 ? 
O1 Gd1 O6 C14 -68.0(3) 2_775 . . . ? 
O3 Gd1 O6 C14 -142.4(3) 2_675 . . . ? 
O2 Gd1 O6 C14 138.4(3) . . . . ? 
O4 Gd1 O6 C14 4.2(3) 1_655 . . . ? 
O5 Gd1 O6 C14 6.6(2) . . . . ? 
N4 Gd1 O6 C14 75.5(3) . . . . ? 
N3 Gd1 O6 C14 138.2(3) . . . . ? 
O1 Gd1 O6 C14 -126.8(3) . . . . ? 
Gd1 Gd1 O6 C14 -87.6(3) 2_775 . . . ? 
O1 Gd1 O5 C14 92.2(3) 2_775 . . . ? 
O3 Gd1 O5 C14 32.2(3) 2_675 . . . ? 
O2 Gd1 O5 C14 -131.0(3) . . . . ? 
O4 Gd1 O5 C14 171.6(3) 1_655 . . . ? 
O6 Gd1 O5 C14 -6.6(2) . . . . ? 
N4 Gd1 O5 C14 -106.9(3) . . . . ? 
N3 Gd1 O5 C14 -54.6(3) . . . . ? 
O1 Gd1 O5 C14 140.9(2) . . . . ? 
Gd1 Gd1 O5 C14 112.6(2) 2_775 . . . ? 
O1 Gd1 N3 C27 28.9(5) 2_775 . . . ? 
O3 Gd1 N3 C27 -0.7(4) 2_675 . . . ? 
O2 Gd1 N3 C27 -95.6(4) . . . . ? 
O4 Gd1 N3 C27 -145.5(4) 1_655 . . . ? 
O6 Gd1 N3 C27 84.3(4) . . . . ? 
O5 Gd1 N3 C27 122.9(4) . . . . ? 
N4 Gd1 N3 C27 -179.9(4) . . . . ? 
O1 Gd1 N3 C27 -67.1(4) . . . . ? 
Gd1 Gd1 N3 C27 -40.2(4) 2_775 . . . ? 
O1 Gd1 N3 C31 -151.9(3) 2_775 . . . ? 
O3 Gd1 N3 C31 178.5(4) 2_675 . . . ? 
O2 Gd1 N3 C31 83.6(3) . . . . ? 
O4 Gd1 N3 C31 33.8(4) 1_655 . . . ? 
O6 Gd1 N3 C31 -96.4(3) . . . . ? 
O5 Gd1 N3 C31 -57.9(4) . . . . ? 
N4 Gd1 N3 C31 -0.7(3) . . . . ? 
O1 Gd1 N3 C31 112.1(3) . . . . ? 
Gd1 Gd1 N3 C31 139.0(3) 2_775 . . . ? 
O1 Gd1 N4 C38 -24.5(5) 2_775 . . . ? 
O3 Gd1 N4 C38 179.9(3) 2_675 . . . ? 
O2 Gd1 N4 C38 108.9(4) . . . . ? 
O4 Gd1 N4 C38 25.2(4) 1_655 . . . ? 
O6 Gd1 N4 C38 -108.2(4) . . . . ? 
O5 Gd1 N4 C38 -56.6(4) . . . . ? 
N3 Gd1 N4 C38 -178.9(4) . . . . ? 
O1 Gd1 N4 C38 83.1(4) . . . . ? 
Gd1 Gd1 N4 C38 49.1(4) 2_775 . . . ? 
O1 Gd1 N4 C35 156.6(3) 2_775 . . . ? 
O3 Gd1 N4 C35 0.9(4) 2_675 . . . ? 
O2 Gd1 N4 C35 -70.1(3) . . . . ? 
O4 Gd1 N4 C35 -153.8(4) 1_655 . . . ? 
O6 Gd1 N4 C35 72.8(3) . . . . ? 
O5 Gd1 N4 C35 124.4(4) . . . . ? 
N3 Gd1 N4 C35 2.1(3) . . . . ? 
O1 Gd1 N4 C35 -95.9(3) . . . . ? 
Gd1 Gd1 N4 C35 -129.8(3) 2_775 . . . ? 
C27 N3 C31 C30 -2.2(7) . . . . ? 
Gd1 N3 C31 C30 178.5(3) . . . . ? 
C27 N3 C31 C35 178.6(4) . . . . ? 
Gd1 N3 C31 C35 -0.6(6) . . . . ? 
C35 N4 C38 C37 2.0(8) . . . . ? 
Gd1 N4 C38 C37 -177.0(4) . . . . ? 
C3 C2 C7 C6 0.3(7) . . . . ? 
C1 C2 C7 C6 -168.9(5) . . . . ? 
C3 C2 C7 C8 177.9(4) . . . . ? 
C1 C2 C7 C8 8.7(7) . . . . ? 
C9 C8 C7 C6 67.7(6) . . . . ? 
C12 C8 C7 C6 -108.0(6) . . . . ? 
C9 C8 C7 C2 -109.9(5) . . . . ? 
C12 C8 C7 C2 74.4(6) . . . . ? 
Gd1 O5 C14 O6 11.9(4) . . . . ? 
Gd1 O5 C14 C15 -166.4(4) . . . . ? 
Gd1 O6 C14 O5 -12.1(4) . . . . ? 
Gd1 O6 C14 C15 166.2(3) . . . . ? 
Gd1 O2 C1 O1 -9.9(5) . . . . ? 
Gd1 O2 C1 C2 165.8(3) . . . . ? 
Gd1 O1 C1 O2 146.8(15) 2_775 . . . ? 
Gd1 O1 C1 O2 8.4(4) . . . . ? 
Gd1 O1 C1 C2 -29(2) 2_775 . . . ? 
Gd1 O1 C1 C2 -167.3(4) . . . . ? 
C3 C2 C1 O2 -139.1(5) . . . . ? 
C7 C2 C1 O2 30.2(7) . . . . ? 
C3 C2 C1 O1 36.6(6) . . . . ? 
C7 C2 C1 O1 -154.1(4) . . . . ? 
C20 C25 C24 C23 -0.4(9) . . . . ? 
C26 C25 C24 C23 178.3(6) . . . . ? 
C9 C8 C12 C11 1.2(7) . . . . ? 
C7 C8 C12 C11 176.9(4) . . . . ? 
C10 C11 C12 C8 -0.8(7) . . . . ? 
C13 C11 C12 C8 179.8(4) . . . . ? 
C38 N4 C35 C34 -1.1(7) . . . . ? 
Gd1 N4 C35 C34 177.9(4) . . . . ? 
C38 N4 C35 C31 177.7(4) . . . . ? 
Gd1 N4 C35 C31 -3.3(6) . . . . ? 
N3 C31 C35 N4 2.6(7) . . . . ? 
C30 C31 C35 N4 -176.6(4) . . . . ? 
N3 C31 C35 C34 -178.6(4) . . . . ? 
C30 C31 C35 C34 2.2(7) . . . . ? 
Gd1 O3 C13 O4 -10.2(8) 2_675 . . . ? 
Gd1 O3 C13 C11 169.9(3) 2_675 . . . ? 
Gd1 O4 C13 O3 -4.4(8) 1_455 . . . ? 
Gd1 O4 C13 C11 175.4(3) 1_455 . . . ? 
C10 C11 C13 O3 -176.3(4) . . . . ? 
C12 C11 C13 O3 3.1(7) . . . . ? 
C10 C11 C13 O4 3.8(7) . . . . ? 
C12 C11 C13 O4 -176.8(4) . . . . ? 
C31 N3 C27 C28 3.4(8) . . . . ? 
Gd1 N3 C27 C28 -177.4(4) . . . . ? 
C18 C19 C15 C16 0.5(7) . . . . ? 
C18 C19 C15 C14 -174.2(4) . . . . ? 
O5 C14 C15 C16 18.2(7) . . . . ? 
O6 C14 C15 C16 -160.1(5) . . . . ? 
O5 C14 C15 C19 -167.1(4) . . . . ? 
O6 C14 C15 C19 14.6(7) . . . . ? 
C7 C2 C3 C4 -0.3(7) . . . . ? 
C1 C2 C3 C4 169.2(5) . . . . ? 
C33 C32 C30 C29 -179.9(6) . . . . ? 
C33 C32 C30 C31 -0.6(9) . . . . ? 
N3 C31 C30 C29 -1.0(7) . . . . ? 
C35 C31 C30 C29 178.1(5) . . . . ? 
N3 C31 C30 C32 179.7(5) . . . . ? 
C35 C31 C30 C32 -1.2(8) . . . . ? 
C10 N1 C9 C8 -0.4(8) . . . . ? 
C12 C8 C9 N1 -0.6(7) . . . . ? 
C7 C8 C9 N1 -176.6(4) . . . . ? 
C9 N1 C10 C11 0.9(8) . . . . ? 
C12 C11 C10 N1 -0.3(8) . . . . ? 
C13 C11 C10 N1 179.2(5) . . . . ? 
C30 C32 C33 C34 1.4(10) . . . . ? 
C24 C25 C20 C21 2.1(8) . . . . ? 
C26 C25 C20 C21 -176.5(6) . . . . ? 
C24 C25 C20 C18 -176.4(5) . . . . ? 
C26 C25 C20 C18 5.1(9) . . . . ? 
C15 C19 C18 C17 0.4(7) . . . . ? 
C15 C19 C18 C20 174.5(5) . . . . ? 
C21 C20 C18 C17 71.4(7) . . . . ? 
C25 C20 C18 C17 -110.1(6) . . . . ? 
C21 C20 C18 C19 -102.4(6) . . . . ? 
C25 C20 C18 C19 76.0(7) . . . . ? 
C17 N2 C16 C15 0.0(9) . . . . ? 
C19 C15 C16 N2 -0.7(8) . . . . ? 
C14 C15 C16 N2 174.2(5) . . . . ? 
C16 N2 C17 C18 1.0(9) . . . . ? 
C19 C18 C17 N2 -1.2(9) . . . . ? 
C20 C18 C17 N2 -175.3(5) . . . . ? 
C23 C22 C21 C20 -0.6(9) . . . . ? 
C25 C20 C21 C22 -1.6(9) . . . . ? 
C18 C20 C21 C22 176.9(5) . . . . ? 
C24 C25 C26 O8 6.6(9) . . . . ? 
C20 C25 C26 O8 -174.9(6) . . . . ? 
C24 C25 C26 O7 -164.7(6) . . . . ? 
C20 C25 C26 O7 13.9(9) . . . . ? 
C2 C3 C4 C5 -0.7(8) . . . . ? 
C6 C5 C4 C3 1.9(9) . . . . ? 
C4 C5 C6 C7 -2.0(9) . . . . ? 
C2 C7 C6 C5 0.9(8) . . . . ? 
C8 C7 C6 C5 -176.8(5) . . . . ? 
C34 C36 C37 C38 -1.0(9) . . . . ? 
N4 C38 C37 C36 -0.9(9) . . . . ? 
C37 C36 C34 C35 1.8(8) . . . . ? 
C37 C36 C34 C33 -176.2(6) . . . . ? 
N4 C35 C34 C36 -0.7(8) . . . . ? 
C31 C35 C34 C36 -179.5(5) . . . . ? 
N4 C35 C34 C33 177.3(5) . . . . ? 
C31 C35 C34 C33 -1.4(8) . . . . ? 
C32 C33 C34 C36 177.6(6) . . . . ? 
C32 C33 C34 C35 -0.3(9) . . . . ? 
C21 C22 C23 C24 2.3(9) . . . . ? 
C25 C24 C23 C22 -1.9(9) . . . . ? 
C32 C30 C29 C28 -177.4(6) . . . . ? 
C31 C30 C29 C28 3.3(8) . . . . ? 
C30 C29 C28 C27 -2.3(8) . . . . ? 
N3 C27 C28 C29 -1.2(9) . . . . ? 
 
loop_ 
 _geom_hbond_atom_site_label_D 
 _geom_hbond_atom_site_label_H 
 _geom_hbond_atom_site_label_A 
 _geom_hbond_distance_DH 
 _geom_hbond_distance_HA 
 _geom_hbond_distance_DA 
 _geom_hbond_angle_DHA 
 _geom_hbond_site_symmetry_A 
O10 H3W O6  0.85 2.07 2.925(8) 179.2 2_666 
O9 H2W O10  0.83 2.09 2.893(10) 164.2 . 
O9 H1W N2  0.85 2.01 2.859(7) 179.2 2_766 
 
_diffrn_measured_fraction_theta_max    0.985 
_diffrn_reflns_theta_full              25.50 
_diffrn_measured_fraction_theta_full   0.985 
_refine_diff_density_max    1.830 
_refine_diff_density_min   -0.984 
_refine_diff_density_rms    0.130 

#===END
